# Supplementary material
Source: PubMed Central journal article supplement (PMC4447322)

## SUPPORTING INFORMATION

### Methoxy-Directed Aryl-to-Aryl 1,3-Rhodium Migration

Jing Zhang,<sup>†</sup> Jun-Feng Liu,<sup>‡</sup> Angel Ugrinov,<sup>†</sup> Anthony F. X. Pillai,<sup>†</sup> Zhong-Ming Sun,<sup>\*,‡</sup> and Pinjing Zhao<sup>\*,†</sup>

<sup>†</sup>Department of Chemistry and Biochemistry, North Dakota State University, Fargo, ND 58102, United States

<sup>‡</sup>State Key Laboratory of Rare Earth Resource Utilization, Changchun Institute of Applied Chemistry, Chinese Academy of Sciences (CAS), Changchun, Jilin 130022, China

#### Table of Contents

|                                                                                             |     |
|---------------------------------------------------------------------------------------------|-----|
| General Experimental Procedure and Reagent Availability.                                    | S2  |
| Synthesis of Deuterium-Labeled 2,6-Dimethoxybenzoic Acid Derivatives.                       | S3  |
| Rh(I)-Catalyzed Protodecarboxylation of Arenecarboxylic Acids.                              | S5  |
| Synthesis of 3-(2,6-Dimethoxyphenyl)-Propionic Acid <i>tert</i> -Butyl Ester ( <b>7a</b> ). | S7  |
| Rh(I)-Catalyzed Decarboxylative Conjugate Addition to Form <b>8a</b> .                      | S7  |
| Rh(I)-Catalyzed Arenebornic Acid Conjugate Addition to Form <b>8a</b> .                     | S8  |
| Single Crystal X-ray Diffraction Data of Complexes <b>2b</b> , <b>3b</b> , and <b>4b</b> .  | S9  |
| Synthesis of Complexes <b>2b</b> , <b>3b</b> , and <b>4b</b> .                              | S11 |
| References.                                                                                 | S14 |
| NMR Spectra.                                                                                | S15 |

## General Experimental Procedure and Reagent Availability

Unless otherwise noted, all manipulations were carried out under a nitrogen atmosphere using standard Schlenk-line or glovebox techniques. All glassware was oven-dried for at least 1 h prior to use. THF, diethyl ether, toluene, benzene, hexane and pentane were degassed by purging with nitrogen for 45 min and dried with a solvent purification system (MBraun MB-SPS). Pyridine, C<sub>6</sub>D<sub>6</sub>, C<sub>7</sub>D<sub>8</sub>, D<sub>2</sub>O, and THF-*d*<sub>8</sub> were degassed by purging with nitrogen and dried over activated 3 Å molecular sieves. Other reagents and substrates were purchased from VWR, Strem, Aldrich or Alfa-Aesar and were used as received. TLC plates were visualized by exposure to ultraviolet light or by exposure to I<sub>2</sub> sealed in a bottle at room temperature. Organic solutions were concentrated by rotary evaporation at ~10 torr. Flash column chromatography was performed with 32–63 microns silica gel.

GC analyses were carried on Shimadzu GC-2010 with *n*-dodecane as internal standard material. <sup>1</sup>H NMR spectra were obtained on a 400 or 500 MHz spectrometer, and chemical shifts were recorded relative to residual protiated solvent. <sup>2</sup>H NMR spectra were obtained on a 76.7 MHz spectrometer. <sup>13</sup>C NMR spectra were obtained at 100 MHz, and chemical shifts were recorded relative to the solvent resonance. Both <sup>1</sup>H and <sup>13</sup>C NMR chemical shifts were reported in parts per million downfield from tetramethylsilane ( $\delta = 0$ ). <sup>31</sup>P NMR spectra were obtained at 121.5 MHz, and chemical shifts were reported in parts per million downfield of 85% H<sub>3</sub>PO<sub>4</sub> ( $\delta = 0$ ). <sup>19</sup>F NMR spectra were obtained at 282.4 MHz, and all chemical shifts were reported in parts per million upfield of CF<sub>3</sub>COOH ( $\delta = -78.5$  ppm).

## Synthesis of Deuterium-Labeled 2,6-Dimethoxybenzoic Acid Derivatives: General Scheme

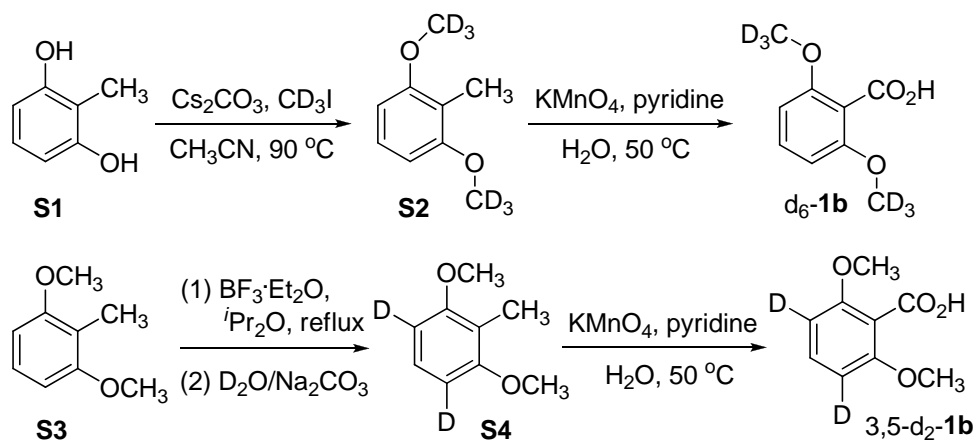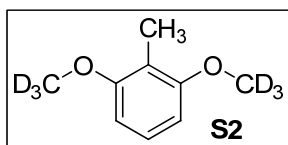

### Synthesis of Deuterium-Labeled (2 x CD<sub>3</sub>) 2,6-Dimethoxy Toluene Derivative S2.

Compound **S2** was synthesized according to a modified literature procedure.<sup>1</sup> Into a 250 mL round-bottom flask was placed a mixture of 2-methylresorcinol (**S1**, 993 mg, 8.0 mmol, 1.0 equiv.) and Cs<sub>2</sub>CO<sub>3</sub> (10.43g, 32.0 mmol, 4.0 equiv.) in 100 mL of acetonitrile. The mixture was refluxed at 90 °C for 1 hour and then CD<sub>3</sub>I (3.5 g, 24 mmol, 99.9% D) was injected under nitrogen. The whole mixture was continuously refluxed for 12 hours. After the reaction was cooled, all volatile materials were removed under reduced pressure. The residue was extracted into Et<sub>2</sub>O (2 × 100 mL), washed with brine (3 x 20 mL), and dried over anhydrous MgSO<sub>4</sub>. The solution was then filtered and concentrated under reduced pressure to remove all volatiles to afford the crude product. Further purification was achieved by flash-column chromatography (EtOAc: Hexane, 1:5) and gave 760 mg of product (yield 77%, D% > 99.5%) as a white solid. <sup>1</sup>H-NMR (400 MHz, CDCl<sub>3</sub>): δ 7.12 (t, 1H, *J* = 8.4 Hz), 6.54 (d, 2H, *J* = 8.4 Hz), 2.13 (s, 3H), <sup>2</sup>H-NMR (76.7 MHz, CH<sub>2</sub>Cl<sub>2</sub>): δ 3.85 (s). <sup>13</sup>C-NMR (100 MHz, CDCl<sub>3</sub>): δ 158.9, 126.5, 115.1, 104.1, 55.0 (very weak, m), 8.4.

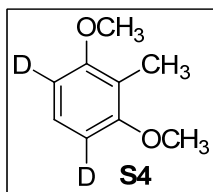

**Synthesis of Deuterium-Labeled (4,6-d<sub>2</sub>) 2,6-Dimethoxy Toluene Derivative S4.** Compound **S4** was synthesized according to a modified literature procedure.<sup>2</sup> To a solution of 1.0 g of 2,6-dimethoxytoluene (**S3**, 6.57 mmol, 1.0 equiv) in 40 mL of <sup>i</sup>Pr<sub>2</sub>O, 10 mL of BF<sub>3</sub>·Et<sub>2</sub>O (81.0 mmol, 12.3 equiv) was added under nitrogen. The mixture was refluxed at 85 °C for 12 hours and then quenched using 15 mL of a 10% Na<sub>2</sub>CO<sub>3</sub>/D<sub>2</sub>O solution and continuously stirred for 4 hours. The organic layer was separated and washed with H<sub>2</sub>O (2 × 5 mL), dried over anhydrous Na<sub>2</sub>SO<sub>4</sub>, filtered and concentrated under reduced pressure to afford the crude product. Further purification was achieved by flash-column chromatography (EtOAc: Hexane, 1:5) and gave 880 mg of product **S4** as a white solid (yield 88%, D% = 70% based on <sup>1</sup>H-NMR). <sup>1</sup>H-NMR (400 MHz, CDCl<sub>3</sub>): δ 7.15 (s, broad, 1H), 6.57 (dd, 0.6 H, *J*<sub>1</sub> = 8.4 Hz, *J*<sub>2</sub> = 1.6 Hz), 3.85 (s, 6H), 2.16 (s, 3H), <sup>2</sup>H-NMR (76.7 MHz, CH<sub>2</sub>Cl<sub>2</sub>): δ 6.57 (s). <sup>13</sup>C-NMR (100 MHz, CDCl<sub>3</sub>): δ 158.6 (d, *J* = 4.1 Hz), 126.4 (t, *J* = 10.2 Hz), 114.7, 103.7, 55.9, 8.4.

**General Procedure for the Oxidation of Deuterium-Labeled 2,6-Dimethoxy Toluene Derivatives (S2, S4) to Form Deuterium-Labeled 2,6-Dimethoxy Benzoic Acid Derivatives (d<sub>6</sub>-1b, 3,5-d<sub>2</sub>-1b).** The oxidation was carried out according to a modified literature procedure.<sup>3</sup> Into a 100 mL round-bottom flask was placed into 500 mg of **S2** or **S4** (3.67 mmol, 1.0 equiv), 5.0 mL of pyridine, and 20 mL of H<sub>2</sub>O under stirring. The mixture was heated at 50 °C for 12 hours during which time 1.8 g of KMnO<sub>4</sub> (11.3 mmol, 3.0 equiv.) was added in small portions over a period of 1 hour. After cooling down to room temperature, the mixture was filtered through Celite and washed twice with 20 mL of H<sub>2</sub>O. The combined filtrate was concentrated to ~5 mL under reduced pressure and then treated by 2 mL of 40% H<sub>2</sub>SO<sub>4</sub>. The resulting white deposit was collected, washed with 30 mL of cold water (~4 °C), and dried at 60 °C to give the benzoic acid product as a white solid: 328 mg for d<sub>6</sub>-**1b** (49% yield) and 302 mg for 3,5-d<sub>2</sub>-**1b** (46%) respectively, without loss of deuterium content (D%) from reactants **S2** and **S4**.

**General Procedure for Rh(I)-Catalyzed Protodecarboxylation of 2,6-Dialkoxy Substituted Benzoic Acids.** Into a 4 mL scintillation vial equipped with a magnetic stir bar was placed hydroxy(1,5-cyclooctadiene)rhodium(I) dimer ( $[(\text{cod})\text{Rh}(\text{OH})]_2$ , 1.5 mg, 0.0034 mmol, 0.015 equiv), DPPP ligand (3.0 mg, 0.007 mmol, 0.03 equiv), and 1.5 mL of toluene. The mixture was stirred at room temperature for 5 minutes until the materials were completely dissolved. Next, the mixture was charged with benzoic acid substrate (0.225 mmol, 1.0 equiv),  $\text{Na}_2\text{CO}_3$  (24.0 mg, 1.0 equiv), and  $\text{H}_2\text{O}$  or  $\text{D}_2\text{O}$  (250  $\mu\text{L}$ , degassed). The vial was then sealed with a silicone-lined screw-cap, transferred out of the glovebox, and stirred at 120  $^\circ\text{C}$  for 30 hours. After the reaction mixture was cooled to room temperature, all volatile materials were removed under reduced pressure. The residue was extracted into ethyl acetate (30 mL), washed with brine (3 x 20 mL), and dried over anhydrous  $\text{MgSO}_4$ . The solution was filtered and the filtrate was concentrated under reduced pressure to give the crude product. Further purification was achieved by flash-column chromatography (EtOAc: Hexane, 1:10). Isolated yields are based on the average of two runs under identical conditions.

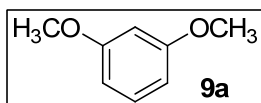

1,3-Dimethoxybenzene (**9a**) was acquired by Rh(I)-catalyzed protodecarboxylation of 2,6-dimethoxybenzoic acid (**1b**) in  $\text{H}_2\text{O}$ /toluene mixed solvent following the general procedure as a colorless oil in 64% yield.  $^1\text{H-NMR}$  (400 MHz,  $\text{CDCl}_3$ ):  $\delta$  7.18 (t, 1H,  $J = 8.4$  Hz), 6.51 (dd, 2H,  $J_1 = 8.4$  Hz,  $J_2 = 2.4$  Hz), 6.47 (t, 1H,  $J = 2.0$  Hz), 3.78 (s, 6H).  $^{13}\text{C-NMR}$  (100 MHz,  $\text{CDCl}_3$ ):  $\delta$  161.1, 130.1, 106.4, 100.7, 55.4.

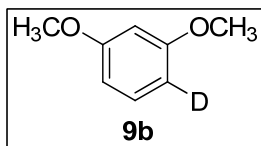

4-*d*-1,3-Dimethoxybenzene (**9b**) was acquired by Rh(I)-catalyzed protodecarboxylation of 2,6-dimethoxybenzoic acid (**1b**) in  $\text{D}_2\text{O}$ /toluene mixed solvent following the general procedure as a colorless oil in 61% yield.  $^1\text{H-NMR}$  (400 MHz,  $\text{CDCl}_3$ ):  $\delta$  7.18 (t, 1H,  $J = 8.4$  Hz), 6.50 (dt, 1.3 H,  $J_1 = 7.2$  Hz,  $J_2 = 1.2$  Hz), 6.46 (d, 1H,  $J = 2.4$  Hz), 3.78 (s, 6H);  $^2\text{H-NMR}$  (76.7 MHz,

CH<sub>2</sub>Cl<sub>2</sub>):  $\delta$  6.50 (s, 1.0 D), 3.77 (s, trace). <sup>13</sup>C-NMR (100 MHz, CDCl<sub>3</sub>):  $\delta$  161.1, 130.0 (d,  $J$  = 8.1 Hz), 106.4, 100.7, 55.4. D% >90% based on <sup>1</sup>H-NMR.

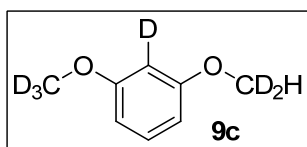

Compound **9c** was acquired by Rh(I)-catalyzed protodecarboxylation of methoxy-deuterated 2,6-dimethoxybenzoic acid (d<sub>6</sub>-**1b**) in H<sub>2</sub>O/toluene following the general procedure as a colorless oil in 67% yield. <sup>1</sup>H-NMR (400 MHz, CDCl<sub>3</sub>):  $\delta$  7.16 (m, 1H), 6.42-6.52 (m, 2H), 3.73 (s, 1H); <sup>2</sup>H-NMR (76.7 MHz, CH<sub>2</sub>Cl<sub>2</sub>):  $\delta$  6.51 (s, 1D), 3.76 (s, 5D). <sup>13</sup>C-NMR (100 MHz, CDCl<sub>3</sub>):  $\delta$  161.1, 130.0 (m), 106.4, 100.7, 54.9 (t,  $J$  = 21.6 Hz). D% >90% based on <sup>1</sup>H-NMR.

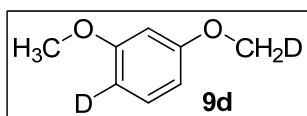

Compound **9d** was acquired by Rh(I)-catalyzed protodecarboxylation of 3,5-deuterated 2,6-dimethoxybenzoic acid (3,5-d<sub>2</sub>-**1b**) in H<sub>2</sub>O/toluene mixed solvent following the general procedure as a colorless oil in 59% yield. <sup>1</sup>H-NMR (500 MHz, CDCl<sub>3</sub>):  $\delta$  7.22 (m, 1H), 6.54 (dd, 1.4 H,  $J_1$  = 6.8 Hz,  $J_2$  = 2.4 Hz), 6.50 (t, 1H,  $J$  = 2.0 Hz), 3.83 (s, 3H), 3.81 (t,  $J$  = 2.4 Hz); <sup>2</sup>H-NMR (76.7 MHz, CH<sub>2</sub>Cl<sub>2</sub>):  $\delta$  6.55 (s, 1D), 3.81 (s, 1D). <sup>13</sup>C-NMR (100 MHz, CDCl<sub>3</sub>):  $\delta$  161.1, 130.0 (d,  $J$  = 10.8 Hz), 106.4, 100.7, 55.5, 55.2 (t,  $J$  = 18.5 Hz). D% ~60% based on <sup>1</sup>H-NMR (Note: 70% deuterium content for the reactant 3,5-d<sub>2</sub>-**1b**).

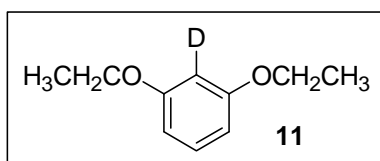

Compound **11** was acquired by Rh(I)-catalyzed protodecarboxylation of 2,6-diethoxybenzoic acid (**10**) in D<sub>2</sub>O/toluene mixed solvent following the general procedure as a colorless oil in 85% yield. <sup>1</sup>H-NMR (500 MHz, CDCl<sub>3</sub>):  $\delta$  7.14 (t, 1H,  $J$  = 8.0 Hz), 6.47 (d, 2H,  $J$  = 8.4 Hz), 4.00 (q, 4H,  $J$  = 7.2 Hz), 1.39 (t, 6H,  $J$  = 6.8 Hz). <sup>2</sup>H-NMR (76.7 MHz, CH<sub>2</sub>Cl<sub>2</sub>): 6.41 (s). <sup>13</sup>C-NMR (100 MHz, CDCl<sub>3</sub>):  $\delta$  160.4, 130.0, 106.9, 101.6, 63.6, 15.0. D% >90% based on <sup>1</sup>H-NMR.

### Synthesis of 3-(2,6-Dimethoxyphenyl)-Propionic Acid *tert*-Butyl Ester (**7a**)

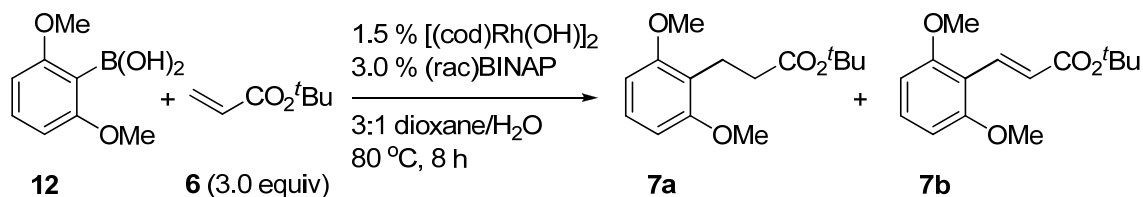

Compound **7a** was independently synthesized for comparison using a modified literature procedure.<sup>4</sup> Into a 4 mL scintillation vial equipped with a magnetic stir bar was placed 2,6-dimethoxyphenylboronic acid (**12**, 182 mg, 1.0 mmol), *tert*-butyl acrylate (**6**, 302 mg, 3.0 mmol), [(cod)Rh(OH)<sub>2</sub>]<sub>2</sub> (6.8 mg, 0.015 mmol, 0.015 equiv), BINAP ligand (18.7 mg, 0.030 mmol, 0.030 equiv) and mixed dioxane/H<sub>2</sub>O (1.5 mL : 0.5 mL). The vial was then sealed with a silicone-lined screw-cap, transferred out of the glovebox, and stirred at 80 °C for 8 hours. After the reaction, the mixture was quenched by H<sub>2</sub>O (50 mL) and extracted by EtOAc (25 mL × 2). The combined organic phase was washed by saturated NaHCO<sub>3</sub> (30 mL × 2), brine (30 mL × 2) and concentrated under reduced pressure to give the crude product as a 2:1 mixture of **7a** and olefination product **7b** in 65% overall yield by GC analysis. Further purification by flash-column chromatography (10% ethyl acetate in hexane) gave **7a** as a colorless oil (107 mg, 43%). <sup>1</sup>H-NMR (400 MHz, CDCl<sub>3</sub>): δ 7.11 (t, 1H, *J* = 8.0 Hz), 6.50 (d, 2H, *J* = 8.4 Hz), 3.78 (s, 6H), 2.91 (t, 2H, *J* = 8.0 Hz), 2.39 (t, 2H, *J* = 8.0 Hz), 1.42 (s, 9H). <sup>13</sup>C-NMR (100 MHz, CDCl<sub>3</sub>): δ 173.4, 158.5, 127.3, 117.4, 103.8, 79.9, 55.8, 34.9, 28.3, 18.9. HRMS: calcd for C<sub>15</sub>H<sub>22</sub>O<sub>4</sub>Na<sup>+</sup> 289.1410, found 289.1398; C<sub>11</sub>H<sub>14</sub>O<sub>4</sub>Na<sup>+</sup> 233.0784, found 233.0792 (*t*-Bu group loss).

### Rh(I)-Catalyzed Decarboxylative Conjugate Addition to Form 1,3-Migration Product **8a**.

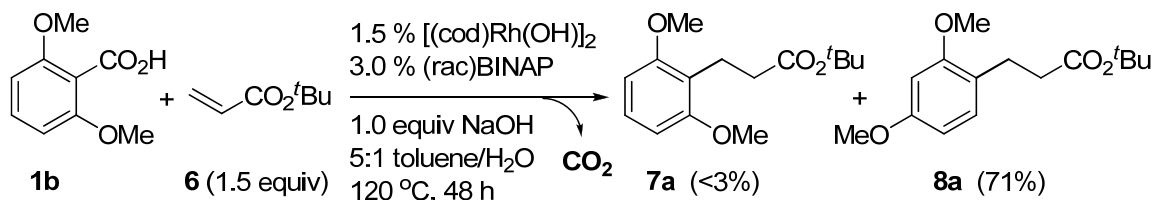

Into a 20 mL scintillation vial equipped with a magnetic stir bar was placed [(cod)Rh(OH)<sub>2</sub>]<sub>2</sub> (15 mg, 0.034 mmol), BINAP (42 mg, 0.068 mmol), and 10.0 mL of toluene. The mixture was stirred at 60 °C for 1 hour until the materials were completely dissolved to form a stock solution.

Next, into a 4 mL screw-cap vial equipped with a magnetic stir bar was placed 2,6-dimethoxybenzoic acid **1b** (41.0 mg, 0.225 mmol, 1.0 equiv), *t*-butyl acrylate **6** (43.3 mg, 0.338 mmol, 1.5 equiv equiv), NaOH (9.0 mg, 1.0 equiv), H<sub>2</sub>O (200  $\mu$ L, degassed), and 1.0 mL of the Rh/phosphine stock solution in toluene (containing 0.015 equiv of [(cod)Rh(OH)]<sub>2</sub> and 0.030 equiv of BINAP). The vial was sealed with a silicone-lined screw-cap, transferred out of the glovebox, and stirred at 120 °C for 48 hours. After the reaction mixture was cooled, all volatile materials were removed under reduced pressure. The residue was extracted into ethyl acetate (30 mL), washed with brine (3  $\times$  20 mL), dried over anhydrous MgSO<sub>4</sub>, filtered and concentrated under reduced pressure to give the crude product. Further purification was achieved by flash-column chromatography (EtOAc/Hexane) to give **8a** as colorless oil (42.5 mg, 71% yield). <sup>1</sup>H-NMR (400 MHz, CDCl<sub>3</sub>):  $\delta$  7.04 (d, 1H, *J* = 8.0 Hz), 6.43 (d, 1H, *J* = 2.4 Hz), 6.39 (dd, 1H, *J*<sub>1</sub> = 8.0 Hz, *J*<sub>2</sub> = 2.4 Hz), 3.80 (s, 3H), 3.79 (s, 3H), 2.82 (t, 2H, *J* = 8.0 Hz), 2.47 (t, 2H, *J* = 8.0 Hz), 1.42 (s, 9H). <sup>13</sup>C-NMR (100 MHz, CDCl<sub>3</sub>):  $\delta$  173.1, 159.6, 158.6, 130.3, 121.8, 103.9, 80.2, 55.4, 35.9, 28.3, 25.7. HRMS: calcd for C<sub>15</sub>H<sub>22</sub>O<sub>4</sub>Na<sup>+</sup> 289.1410, found 289.1408. C<sub>11</sub>H<sub>14</sub>O<sub>4</sub>Na<sup>+</sup> 233.0784, found 233.0787 (*t*-Bu group loss).

#### Rh(I)-Catalyzed Areneboronic Acid Conjugate Addition to Form 1,3-Migration Product **8a**.

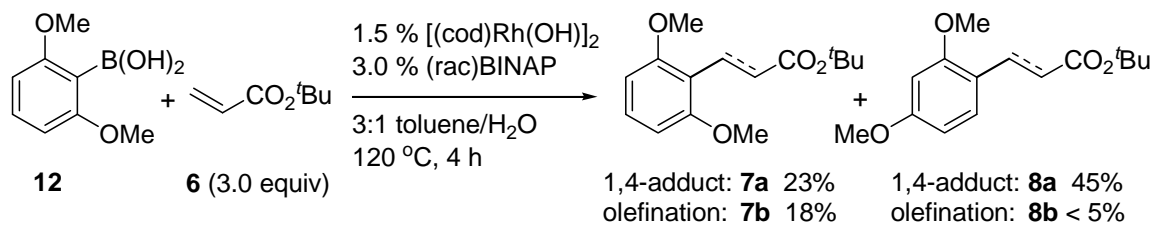

Into a 20 mL scintillation vial equipped with a magnetic stir bar was placed [(cod)Rh(OH)]<sub>2</sub> (15 mg, 0.034 mmol), BINAP (42 mg, 0.068 mmol), and 10.0 mL of toluene. The mixture was stirred at 60 °C for 1 hour until the materials were completely dissolved to form a stock solution. Next, into a 4 mL scintillation vial equipped with a magnetic stir bar was placed 2,6-dimethoxybenzeneboronic acid (**12**, 41 mg, 0.225 mmol, 1.0 equiv), *tert*-butyl acrylate (**6**, 68 mg, 0.675 mmol, 3.0 equiv), 1.0 mL of the Rh/BINAP stock solution (0.015 equiv [(cod)Rh(OH)]<sub>2</sub> and 0.030 equiv BINAP ligand) and 330  $\mu$ L of H<sub>2</sub>O to make a 3:1 toluene/H<sub>2</sub>O solution. The vial was then sealed with a silicone-lined screw-cap, transferred out of the glovebox, and stirred at 120 °C for 4 hours. The yields of **7a**, **7b**, **8a** and **8b** were determined by GC analysis.



**Table S1. Summary of Cell Parameters, Data Collection and Structural Refinements.**

|                                                                                           |                                                                            |                                                                             |                                                                                                         |
|-------------------------------------------------------------------------------------------|----------------------------------------------------------------------------|-----------------------------------------------------------------------------|---------------------------------------------------------------------------------------------------------|
| Empirical formula                                                                         | C <sub>45</sub> H <sub>37</sub> O <sub>4</sub> P <sub>2</sub> Rh <b>2b</b> | C <sub>50</sub> H <sub>42</sub> NO <sub>4</sub> P <sub>2</sub> Rh <b>3b</b> | C <sub>100</sub> H <sub>84</sub> N <sub>2</sub> O <sub>8</sub> P <sub>4</sub> Rh <sub>2</sub> <b>4b</b> |
| Formula weight                                                                            | 806.60                                                                     | 885.70                                                                      | 1771.39                                                                                                 |
| Temperature, K                                                                            |                                                                            | 293(2)                                                                      |                                                                                                         |
| Wavelength, λ(Å)                                                                          |                                                                            | Mo K <sub>α</sub> , 0.71073                                                 |                                                                                                         |
| space group                                                                               | C2/c                                                                       | P-1                                                                         | P2 <sub>1</sub> /n                                                                                      |
| a/Å                                                                                       | 13.498(5)                                                                  | 13.0849(9)                                                                  | 21.6627(17)                                                                                             |
| b/Å                                                                                       | 26.851(10)                                                                 | 13.2803(9)                                                                  | 17.5320(14)                                                                                             |
| c/Å                                                                                       | 14.881(5)                                                                  | 14.9486(11)                                                                 | 25.769(2)                                                                                               |
| α, deg                                                                                    | 90                                                                         | 78.0370(10)                                                                 | 90                                                                                                      |
| β, deg                                                                                    | 101.799(7)                                                                 | 70.5080(10)                                                                 | 98.035(2)                                                                                               |
| γ, deg                                                                                    | 90                                                                         | 87.3840(10)                                                                 | 90                                                                                                      |
| V, Å <sup>3</sup>                                                                         | 5279(3)                                                                    | 2394.8(3)                                                                   | 9690.8(13)                                                                                              |
| Z                                                                                         | 4                                                                          | 2                                                                           | 4                                                                                                       |
| D <sub>calcd</sub> , g.cm <sup>-3</sup>                                                   | 1.015                                                                      | 1.228                                                                       | 1.214                                                                                                   |
| μ, mm <sup>-1</sup>                                                                       | 0.415                                                                      | 0.464                                                                       | 0.459                                                                                                   |
| F(000)                                                                                    | 1656                                                                       | 912                                                                         | 3648                                                                                                    |
| Theta range, deg                                                                          | 1.52 to 24.96                                                              | 1.48 to 27.00                                                               | 1.15 to 23.28                                                                                           |
| hkl ranges                                                                                | [-15, 11], [-30, 31], ±17                                                  | [-15, 16], ±16, ±19                                                         | [-24, 23], [-18, 19], ±28                                                                               |
| Refltns collected/unique                                                                  | 13886/4605 ( <i>R</i> <sub>int</sub> = 0.0544)                             | 21525/10303 ( <i>R</i> <sub>int</sub> = 0.0304)                             | 62598/13914 ( <i>R</i> <sub>int</sub> = 0.0528)                                                         |
| GOOF on F <sup>2</sup>                                                                    | 1.001                                                                      | 0.998                                                                       | 1.077                                                                                                   |
| <i>R</i> <sub>1</sub> , w <i>R</i> <sub>2</sub> ( <i>I</i> > 2σ( <i>I</i> )) <sup>a</sup> | 0.0528/0.1269                                                              | 0.0475/0.1387                                                               | 0.0399/0.1223                                                                                           |
| <i>R</i> <sub>1</sub> , w <i>R</i> <sub>2</sub> (all data)                                | 0.0889/0.1355                                                              | 0.0660/0.1490                                                               | 0.0519/0.1283                                                                                           |
| Largest diff. peak and hole (e. Å <sup>-3</sup> )                                         | 0.402 / -0.678                                                             | 0.472 / -0.596                                                              | 0.511 / -0.577                                                                                          |

<sup>a</sup>  $R_1 = \sum ||F_o| - |F_c|| / \sum |F_o|$ ,  $wR_2 = \{ \sum w[(F_o)^2 - (F_c)^2]^2 / \sum w[(F_o)^2]^2 \}^{1/2}$

**Table S2. Selected Bond Lengths [Å] and Bond Angles [degree].**

---

| <b>C<sub>45</sub>H<sub>39</sub>O<sub>4</sub>P<sub>2</sub>Rh 2b</b>                            |            |                    |            |
|-----------------------------------------------------------------------------------------------|------------|--------------------|------------|
| Rh(1)-O(1)                                                                                    | 2.161(3)   | Rh(1)-P(1)         | 2.1763(12) |
| Rh(1)-O(1)#1                                                                                  | 2.161(3)   | Rh(1)-P(1)#1       | 2.1763(12) |
| Rh(1)-C(22)                                                                                   | 2.505(6)   | P(1)-C(13)         | 1.821(5)   |
| P(1)-C(7)                                                                                     | 1.823(4)   | C(21)-O(2)         | 1.328(6)   |
| C(22)-O(1)                                                                                    | 1.284(4)   | C(24)-O(2)         | 1.443(5)   |
| O(1)-Rh(1)-O(1) #1                                                                            | 61.66(16)  | O(1) #1-Rh(1)-P(1) | 103.68(9)  |
| O(1)-Rh(1)-P(1)                                                                               | 165.23(8)  | P(1)-Rh(1)-P(1) #1 | 91.02(6)   |
| <b>C<sub>50</sub>H<sub>44</sub>NO<sub>4</sub>P<sub>2</sub>Rh 3b</b>                           |            |                    |            |
| Rh(1)-O(1)                                                                                    | 2.110(2)   | Rh(1)-N(1)         | 2.136(3)   |
| Rh(1)-P(2)                                                                                    | 2.2298(9)  | Rh(1)-P(1)         | 2.1987(8)  |
| P(1)-C(13)                                                                                    | 1.836(3)   | P(1)-C(7)          | 1.840(3)   |
| P(1)-C(1)                                                                                     | 1.841(4)   | P(2)-C(25)         | 1.836(3)   |
| P(2)-C(31)                                                                                    | 1.840(3)   | P(2)-C(19)         | 1.857(3)   |
| O(1)-Rh(1)-N(1)                                                                               | 81.48(11)  | O(1)-Rh(1)-P(2)    | 94.22(7)   |
| N(1)-Rh(1)-P(2)                                                                               | 173.77(10) | O(1)-Rh(1)-P(1)    | 172.87(7)  |
| N(1)-Rh(1)-P(1)                                                                               | 92.32(9)   | P(2)-Rh(1)-P(1)    | 92.23(3)   |
| <b>C<sub>113</sub>H<sub>112</sub>N<sub>2</sub>O<sub>8</sub>P<sub>4</sub>Rh<sub>2</sub> 4b</b> |            |                    |            |
| Rh(1)-O(5)                                                                                    | 2.120(2)   | Rh(1)-N(1)         | 2.145(3)   |
| Rh(1)-P(2)                                                                                    | 2.1892(9)  | Rh(1)-P(1)         | 2.2099(9)  |
| Rh(2)-O(1)                                                                                    | 2.094(3)   | Rh(2)-N(2)         | 2.141(3)   |
| Rh(2)-P(3)                                                                                    | 2.2029(10) | Rh(2)-P(4)         | 2.1841(9)  |
| P(1)-C(7)                                                                                     | 1.828(4)   | P(1)-C(1)          | 1.855(4)   |
| P(1)-C(13)                                                                                    | 1.840(3)   | P(2)-C(25)         | 1.835(4)   |
| P(2)-C(19)                                                                                    | 1.844(3)   | P(2)-C(31)         | 1.855(4)   |
| P(3)-C(57)                                                                                    | 1.833(4)   | P(3)-C(51)         | 1.838(4)   |
| P(3)-C(63)                                                                                    | 1.837(4)   | P(4)-C(69)         | 1.836(3)   |
| P(4)-C(75)                                                                                    | 1.838(4)   | P(4)-C(81)         | 1.843(4)   |

|                 |           |                 |            |
|-----------------|-----------|-----------------|------------|
| O(5)-Rh(1)-N(1) | 85.35(10) | O(5)-Rh(1)-P(2) | 176.26(7)  |
| N(1)-Rh(1)-P(2) | 94.52(8)  | O(5)-Rh(1)-P(1) | 89.39(7)   |
| N(1)-Rh(1)-P(1) | 170.71(8) | P(2)-Rh(1)-P(1) | 91.22(3)   |
| O(1)-Rh(2)-N(2) | 80.43(12) | O(1)-Rh(2)-P(4) | 171.01(10) |
| N(2)-Rh(2)-P(4) | 92.80(9)  | O(1)-Rh(2)-P(3) | 95.32(9)   |
| N(2)-Rh(2)-P(3) | 168.48(9) | P(4)-Rh(2)-P(3) | 92.42(4)   |

---

Symmetry transformations used to generate equivalent atoms: #1: -x+1, y, -z+1/2

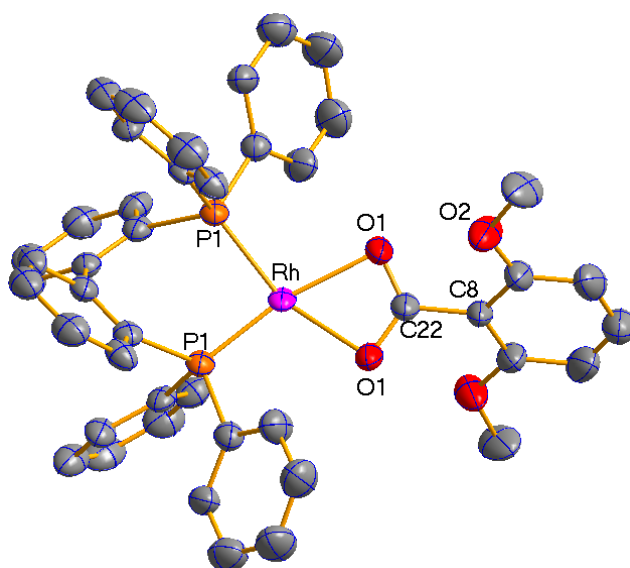

**Preparation of  $\{(\text{BIPHEP})\text{RhOCO}[\eta^2\text{-OCO}(2,6\text{-OMe-C}_6\text{H}_3)]\}\cdot\text{hexane}$  (2b).** Into a 20 mL scintillation vial equipped with a magnetic stir bar was placed  $[(\text{COD})\text{Rh}(\mu\text{-OH})_2]$  (15.0 mg, 0.034 mmol, 1.0 equiv), BIPHEP (40.0 mg, 0.076 mmol, 2.2 equiv), and 4.0 mL of THF. The mixture was stirred at 80 °C for 1 hour. After cooling down to room temperature, all volatile materials were removed under reduced pressure, and the residue was re-dissolved using THF (4.0 mL). 12.4 mg of 2,6-dimethoxybenzoic acid (0.068 mmol, 2.0 equiv) was added as a powder and the mixture was stirred at 60 °C for 2 hours to reach full conversion, as determined by  $^{31}\text{P}$

NMR spectroscopy. The solvent THF was removed under reduced pressure, and the residue was extracted into 3.0 mL of toluene. After gentle heating at 60 °C (~ 30 min), the solution was filtered through a pad of tightly packed glass wool. The filtrate was transferred into a 7 mL vial, carefully layered with hexane (3 mL), and left undisturbed. Maroon-colored block crystals of **2b** were obtained after three days (38.0 mg, 61% yield based on Rh). This complex is air-sensitive and satisfactory element analysis could not be obtained. <sup>31</sup>P-NMR spectra are provided to demonstrate purity. <sup>31</sup>P-NMR (121.5 MHz, toluene): δ 53.86 (d,  $J_{\text{Rh-P}} = 196.8$  Hz).

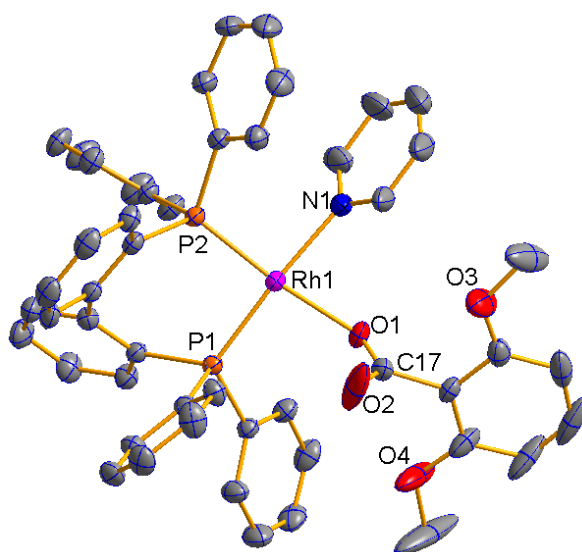

**Preparation of {(BIPHEP)RhOCO[(2,6-(OMe)<sub>2</sub>-C<sub>6</sub>H<sub>3</sub>)(pyridine)]}·(toluene) (3b).** Into a 20 mL scintillation vial equipped with a magnetic stir bar was placed [(COD)Rh(μ-OH)]<sub>2</sub> (15.0 mg, 0.034 mmol, 1.0 equiv), BIPHEP (40.0 mg, 0.076 mmol, 2.2 equiv), and 4.0 mL of THF. The mixture was stirred at 80 °C for 1 hour. After cooling down to room temperature, all volatile materials were removed under reduced pressure, and the residue was re-dissolved using THF (4.0 mL). 2,6- Dimethoxybenzoic acid (12.4 mg, 0.068 mmol, 2.0 equiv) was added as a powder and the mixture was stirred at 60 °C for 2 hours to reach full conversion, as determined by <sup>31</sup>P NMR spectroscopy. The solvent THF was removed under reduced pressure, and the residue was added 8.0 mg of pyridine (0.10 mmol, 1.5 equiv) and then extracted into 3.0 mL of toluene to form a homogeneous solution. The solution was filtered through a pad of tightly packed glass wool. The filtrate was transferred into a 7 mL vial, carefully layered with hexane (3.0 mL), and

left undisturbed. Red needle-like crystals of **3b** were obtained after three days (34.0 mg, 52% yield based on Rh). This complex is air-sensitive and satisfactory element analysis could not be obtained.  $^{31}\text{P}$ -NMR spectra are provided to demonstrate purity.  $^{31}\text{P}$ -NMR (202.3 MHz, toluene, 263.0 K):  $\delta$  54.1 (broad doublet,  $J_{\text{Rh-P}} = 166.1$  Hz), 48.6 (d,  $J_{\text{Rh-P}} = 141.2$  Hz).

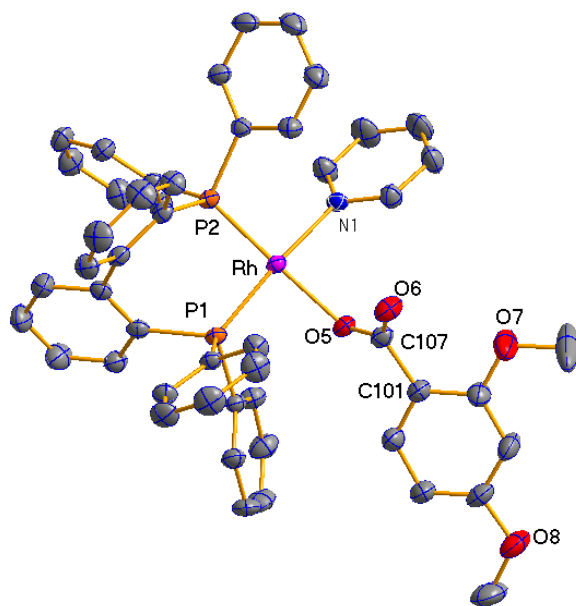

**Preparation of  $\{(\text{BIPHEP})\text{Rh}[(2,4\text{-OMe-C}_6\text{H}_3)(\text{pyridine})]\} \cdot (\text{toluene})(\text{hexane})$  (**4b**).** Into a 4 mL scintillation vial equipped with a magnetic stir bar was placed  $\{(\text{BIPHEP})\text{RhOCO}[(2,6\text{-OMe-C}_6\text{H}_3)(\text{pyridine})]\} \cdot (\text{toluene})$  (100 mg, 0.10 mmol, 1.0 equiv), pyridine (12 mg, 0.15 mmol, 1.5 equiv), and 3.0 mL of toluene. The mixture was stirred at 120 °C for 3 hours to reach full conversion. After cooling down to room temperature, the solution was filtered through a pad of tightly packed glass wool. The filtrate was transferred into a 7 mL vial, carefully layered with hexane (3.0 mL), and left undisturbed. Red needle-like crystals of **4b** were obtained after three days (18 mg, 18% yield based on Rh). The yield could be increased to 71% ( $^1\text{H}$ NMR yield using dodecahydrotriphenylene as internal standard) under 1 atm of  $\text{CO}_2$  after heating at 120°C for 2 hours with >95% conversion. This complex is air-sensitive and satisfactory element analysis could not be obtained.  $^{31}\text{P}$ -NMR spectra are provided to demonstrate purity.  $^{31}\text{P}$ -NMR (202.3 MHz, toluene, 263.0 K):  $\delta$  55.7 (broad doublet,  $J_{\text{Rh-P}} = 169.7$  Hz), 50.4 (d,  $J_{\text{Rh-P}} = 145.0$  Hz).

## References

1. J. C. Lee, J. Y. Yuk, S.H. Cho, *Synth. Commun.* **1995**, *25*, 1367-1370.
2. A. Kreuchunas, *J. Org. Chem.* **1956**, *21*, 368-369.
3. A. R. Makriyannis, A. Charalambous, C. J. van der Schyf, A. Makriyannis, *J. Labelled. Comp. Radiopharm.* **1987**, *24*, 1479-1482.
4. T. Hayashi, M. Takahashi, Y. Takaya, M. Ogasawara, *J. Am. Chem. Soc.* **2002**, *124*, 5052-5058.

zsun-III-142-H1

Pulse Sequence: s2pu1

Solvent: cdcl3

Ambient temperature

Operator: zsun

File: zsun-III-142-H1

Mercury-300BB "vnmr300"

Relax. delay 1.000 sec  
Pulse 66.3 degrees  
Acq. time 1.997 sec  
Width 3301.4 Hz  
40 repetitions  
OBSERVE H1, 300.1377222 MHz  
DATA PROCESSING  
Line broadening 0.1 Hz  
FT size 16384  
Total time 8 min, 11sec

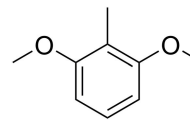

S3

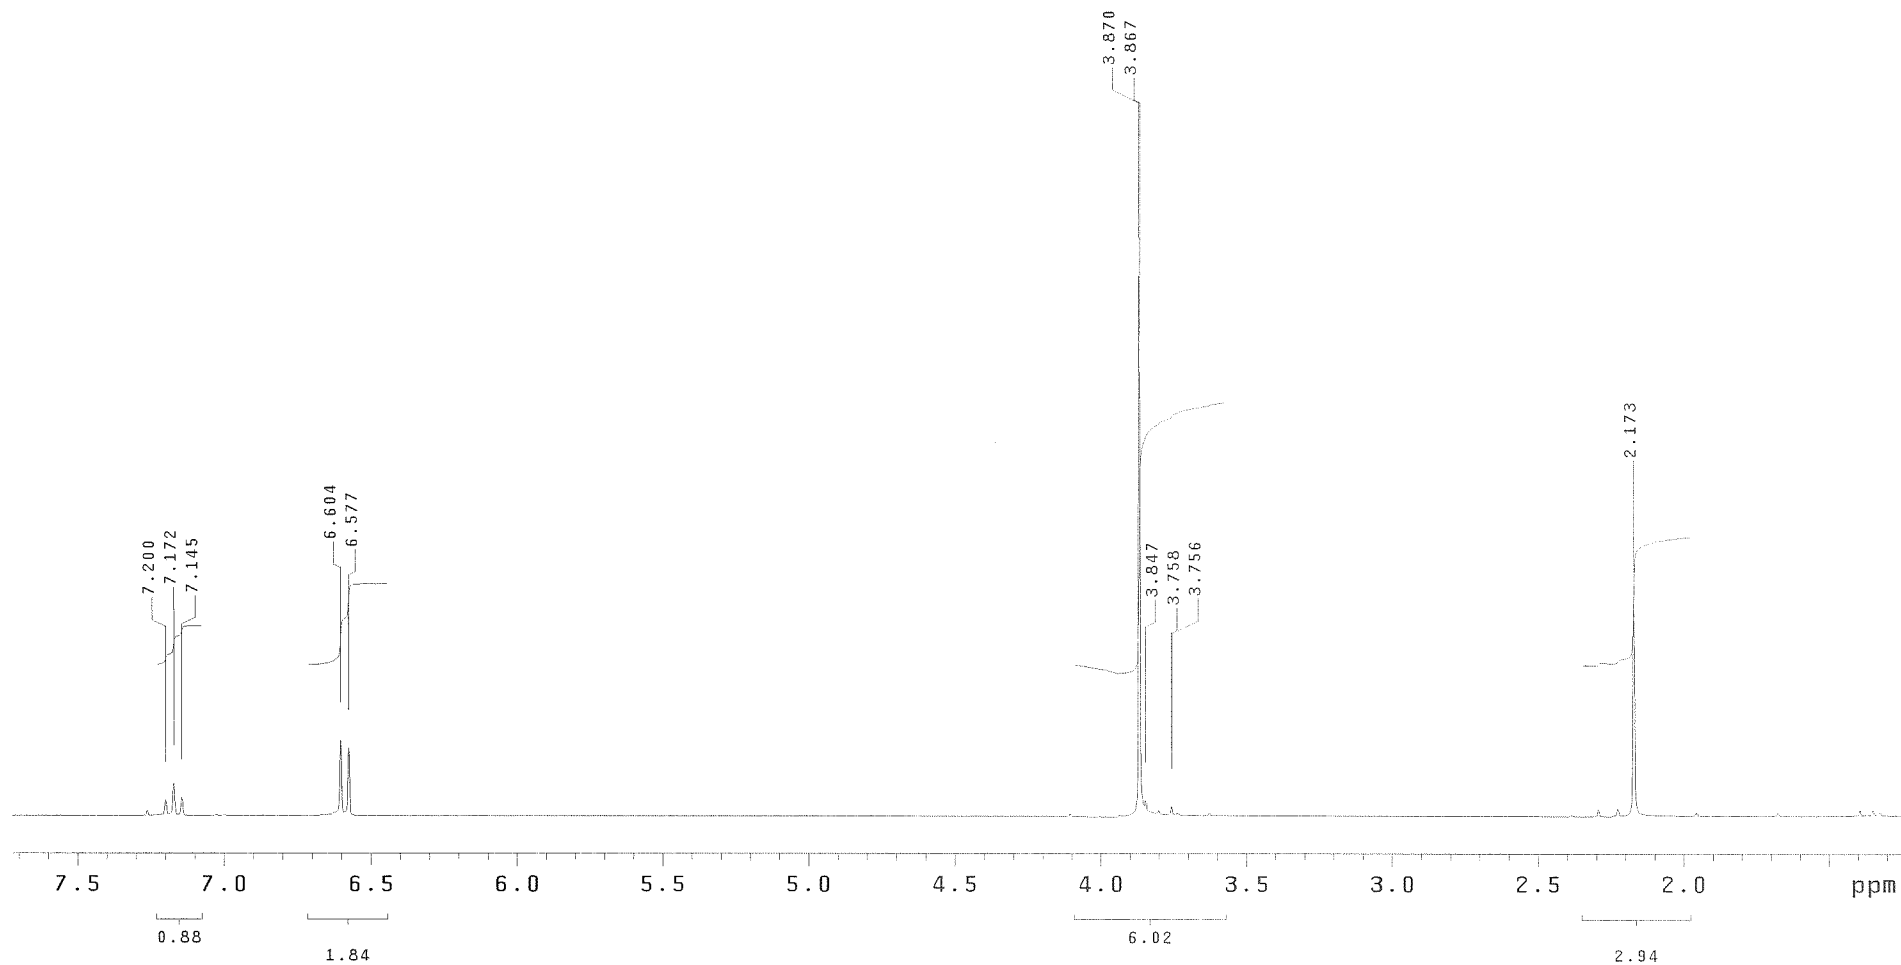

zsun-III-142-C13

Pulse Sequence: s2pu1

Solvent: cdcl3

Ambient temperature

Operator: zsun

File: zsun-III-142-C13

Mercury-300BB "vnmr300"

Relax. delay 0.200 sec  
Pulse 44.6 degrees  
Acq. time 1.927 sec  
Width 16611.3 Hz  
204 repetitions  
OBSERVE C13, 75.4696723 MHz  
DECOUPLE H1, 300.1391844 MHz  
Power 43 dB  
on during acquisition  
off during delay  
WALTZ-16 modulated  
DATA PROCESSING  
Line broadening 1.0 Hz  
FT size 65536  
Total time 3 hr, 30 min, 52 sec

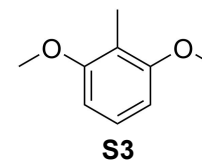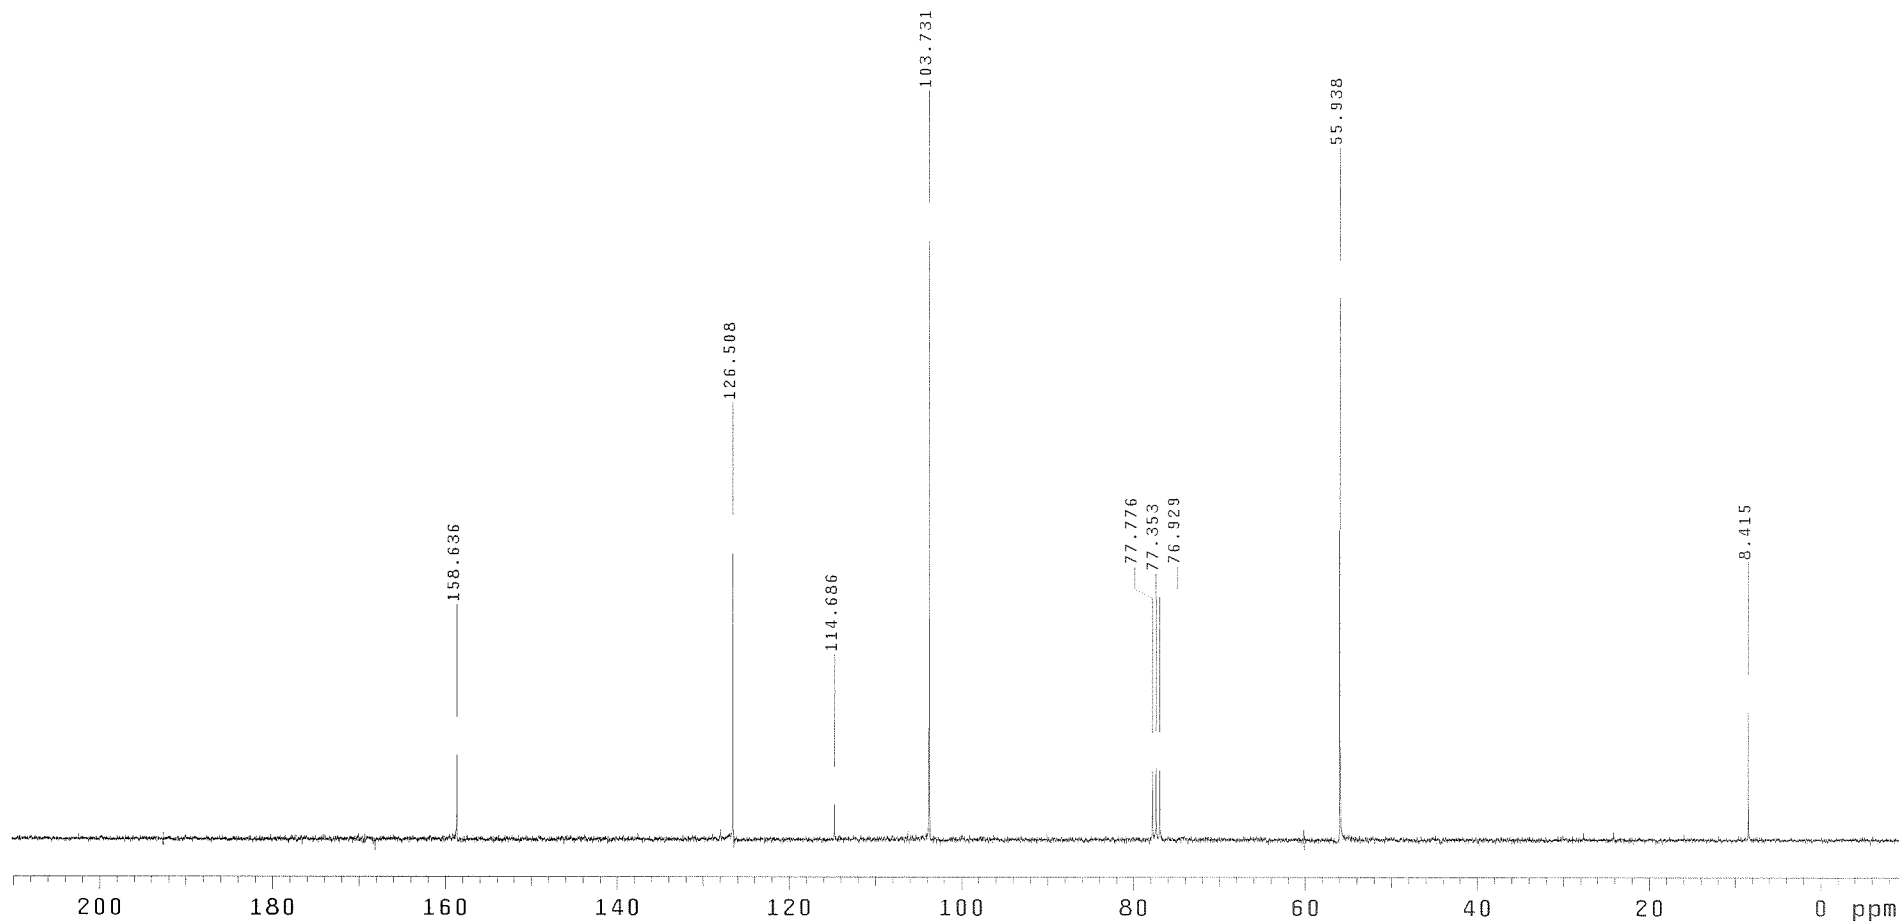



zsun-III-143-H1

Pulse Sequence: s2pu1

Solvent: cdcl3

Temp. 25.0 C / 298.1 K

File: zsun-III-143-H1

INOVA-400 "vnmr400"

Relax. delay 0.300 sec

Pulse 45.0 degrees

Acq. time 3.334 sec

Width 4662.0 Hz

60 repetitions

OBSERVE H1, 399.9356500 MHz

DATA PROCESSING

FT size 262144

Total time 3 min, 38 sec

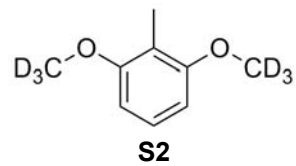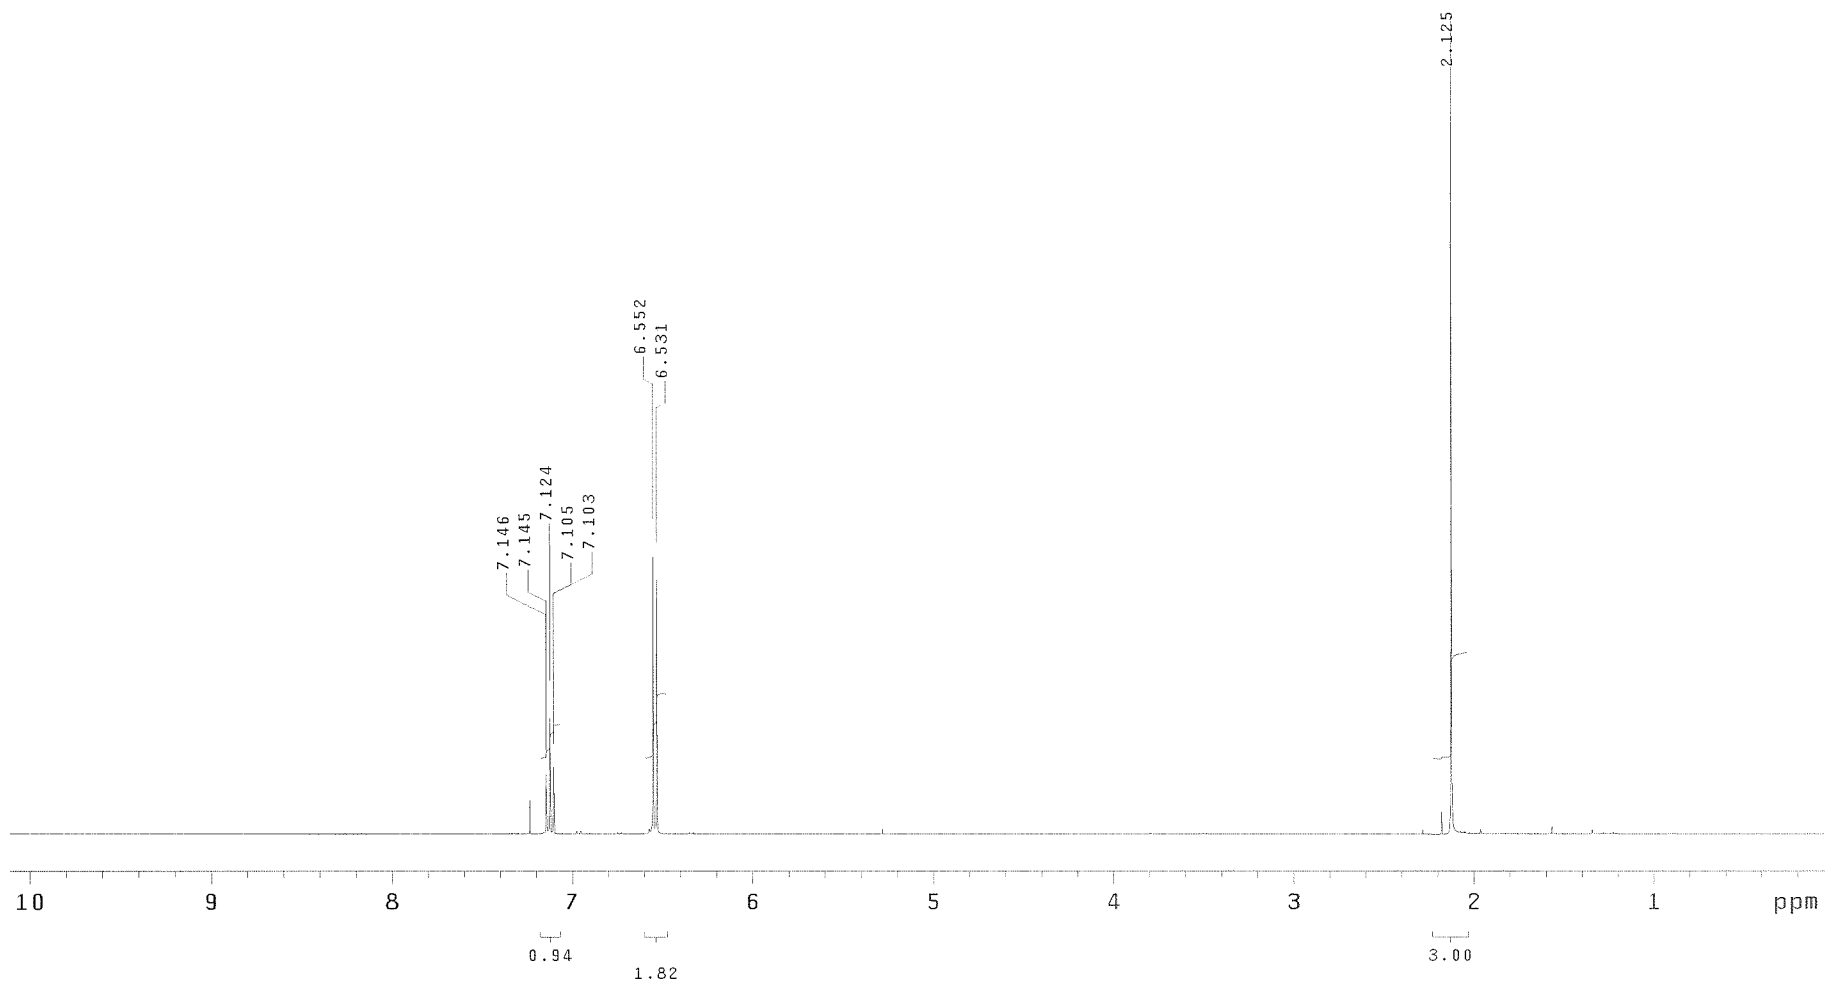

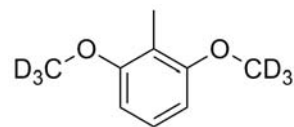

S2

zsun-III-143-H2

Pulse Sequence: s2pu1

Solvent: CDC13

Temp. 25.0 C / 298.1 K

Operator: zsun

INOVA-500 "vnmr500"

Pulse 16.7 degrees

Acq. time 1.334 sec

Width 1534.7 Hz

120 repetitions

OBSERVE H2, 76.7003325 MHz

DATA PROCESSING

Line broadening 3.0 Hz

FT size 4096

Total time 8 min, 57 sec

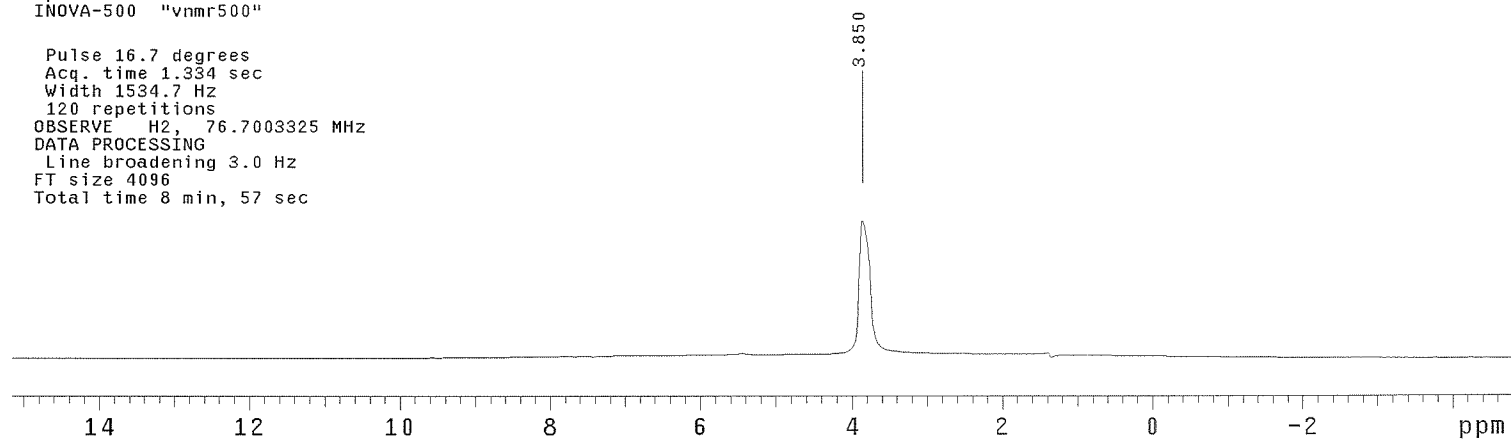

C220PPM

Pulse Sequence: s2pu1

Solvent: cdcl3

Temp. 45.0 C / 318.1 K

INOVA-400 "vnmr400"

Relax. delay 0.300 sec

Pulse 45.0 degrees

Acq. time 0.720 sec

Width 22222.2 Hz

520 repetitions

OBSERVE C13, 100.5638587 MHz

DECOUPLE H1, 399.9376499 MHz

Power 35 dB

on during acquisition

off during delay

WALTZ-16 modulated

DATA PROCESSING

Line broadening 1.0 Hz

FT size 32768

Total time 51 min, 28 sec

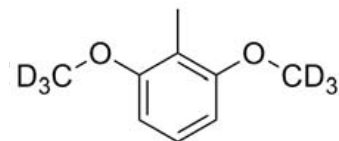

S2

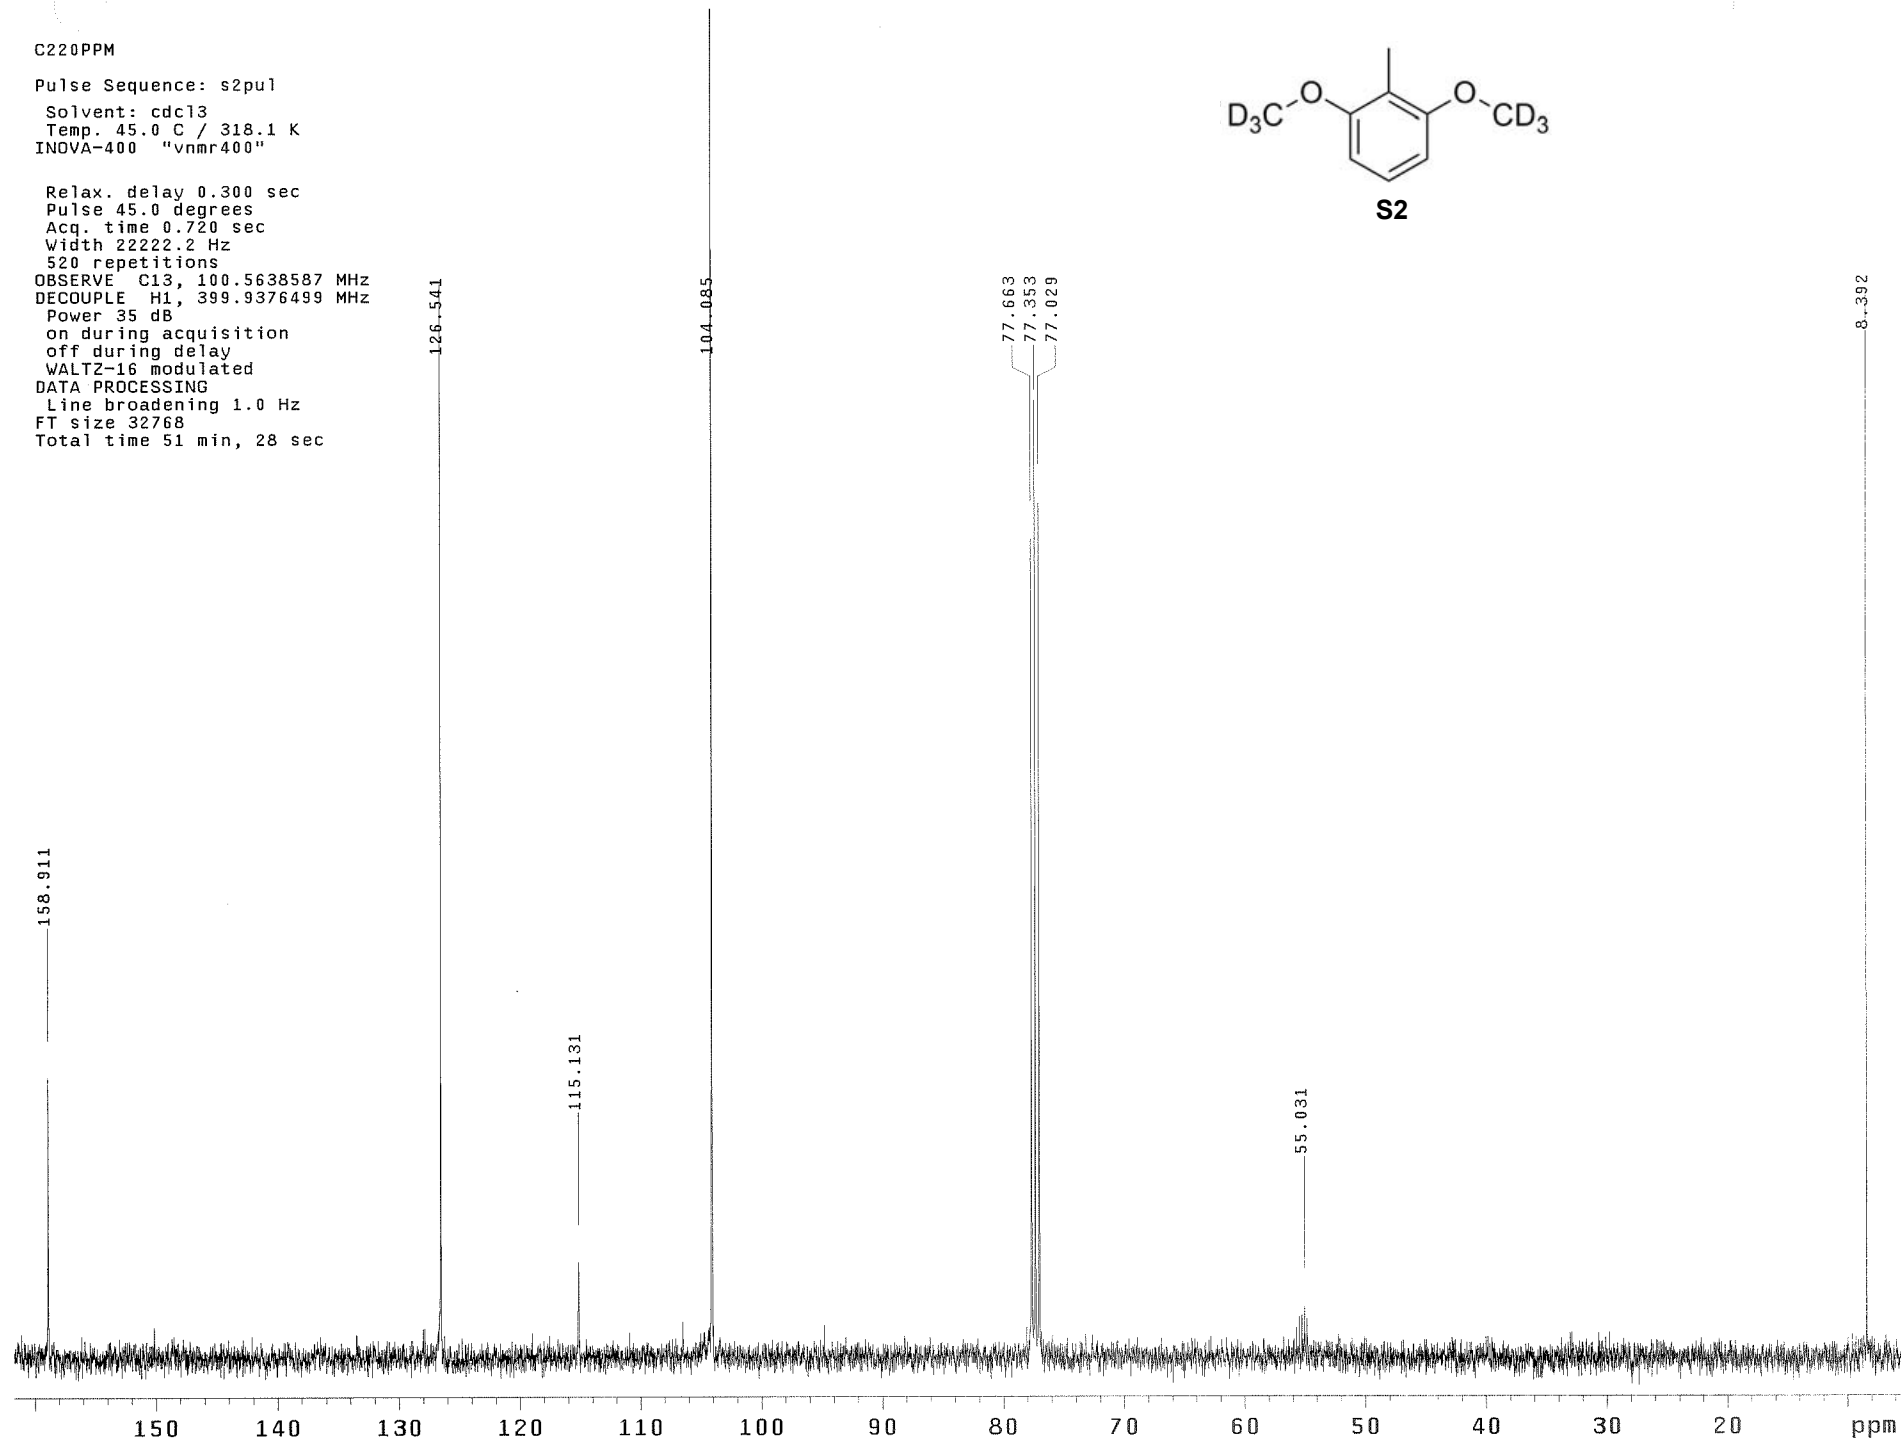

S19

zsun-IV-58-H1

Pulse Sequence: s2pul

Solvent: cdcl3  
Temp. 25.0 C / 298.1 K  
INOVA-400 "vnmr400"

Relax. delay 0.300 sec  
Pulse 45.0 degrees  
Acq. time 3.334 sec  
Width 4662.0 Hz  
60 repetitions  
OBSERVE H1, 399.9356500 MHz  
DATA PROCESSING  
FT size 262144  
Total time 3 min, 38 sec

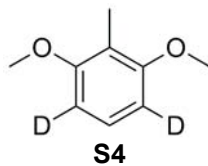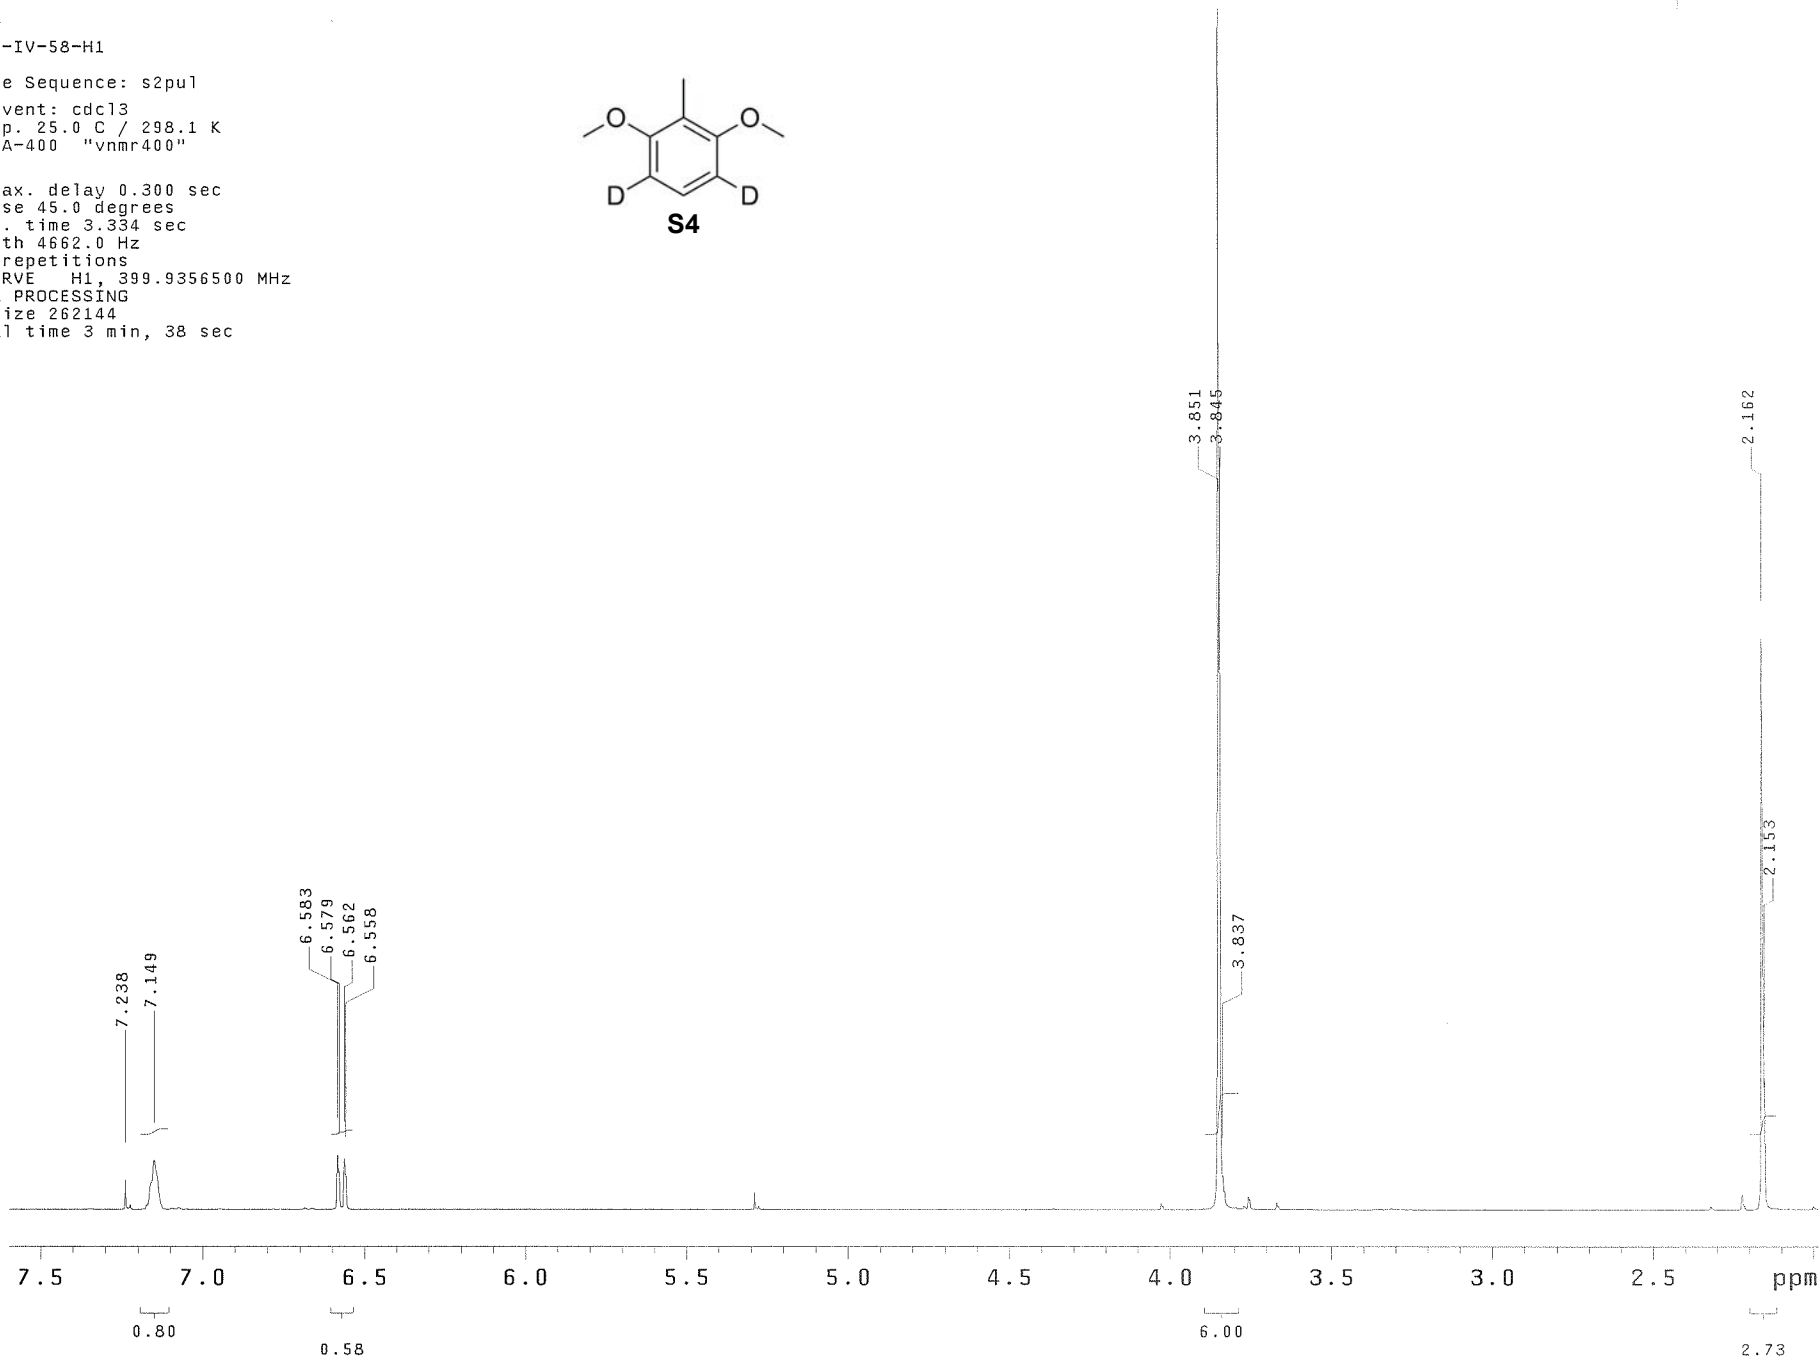

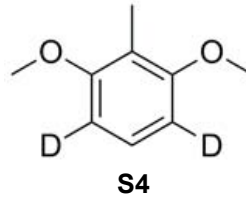

zsun-IV-58-H2

Pulse Sequence: s2pu1

Solvent: CDC13

Temp. 25.0 C / 298.1 K

Operator: zsun

INOVA-500 "vnmr500"

Pulse 16.7 degrees

Acq. time 1.334 sec

Width 1534.7 Hz

176 repetitions

OBSERVE H2, 76.7003378 MHz

DATA PROCESSING

Line broadening 3.0 Hz

FT size 4096

Total time 4 min, 28 sec

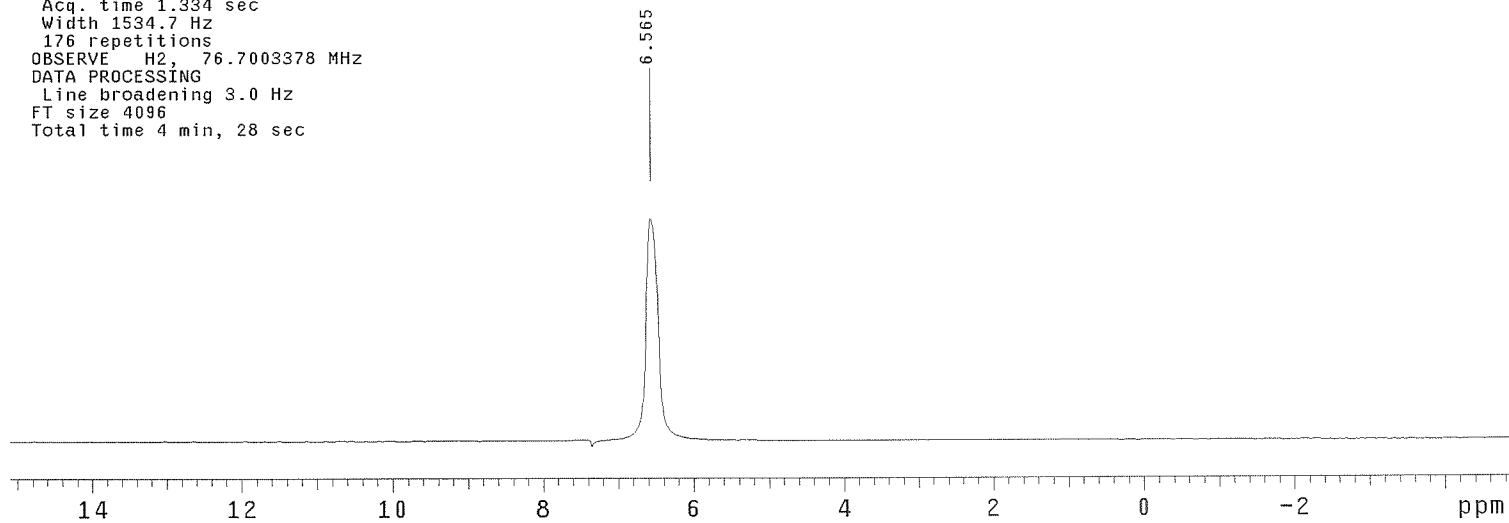

S21

zsun-IV-58-C13

Pulse Sequence: s2pul

Solvent: CDCl3  
Temp. 25.0 C / 298.1 K  
INOVA-400 "vnmr400"

Relax. delay 0.300 sec  
Pulse 45.0 degrees  
Acq. time 0.720 sec  
Width 22222.2 Hz  
200 repetitions  
OBSERVE C13, 100.5638752 MHz  
DECOUPLE H1, 399.9376499 MHz  
Power 35 dB  
on during acquisition  
off during delay  
WALTZ-16 modulated  
DATA PROCESSING  
Line broadening 1.0 Hz  
FT size 32768  
Total time 1 hr, 8 min, 37 sec

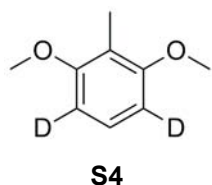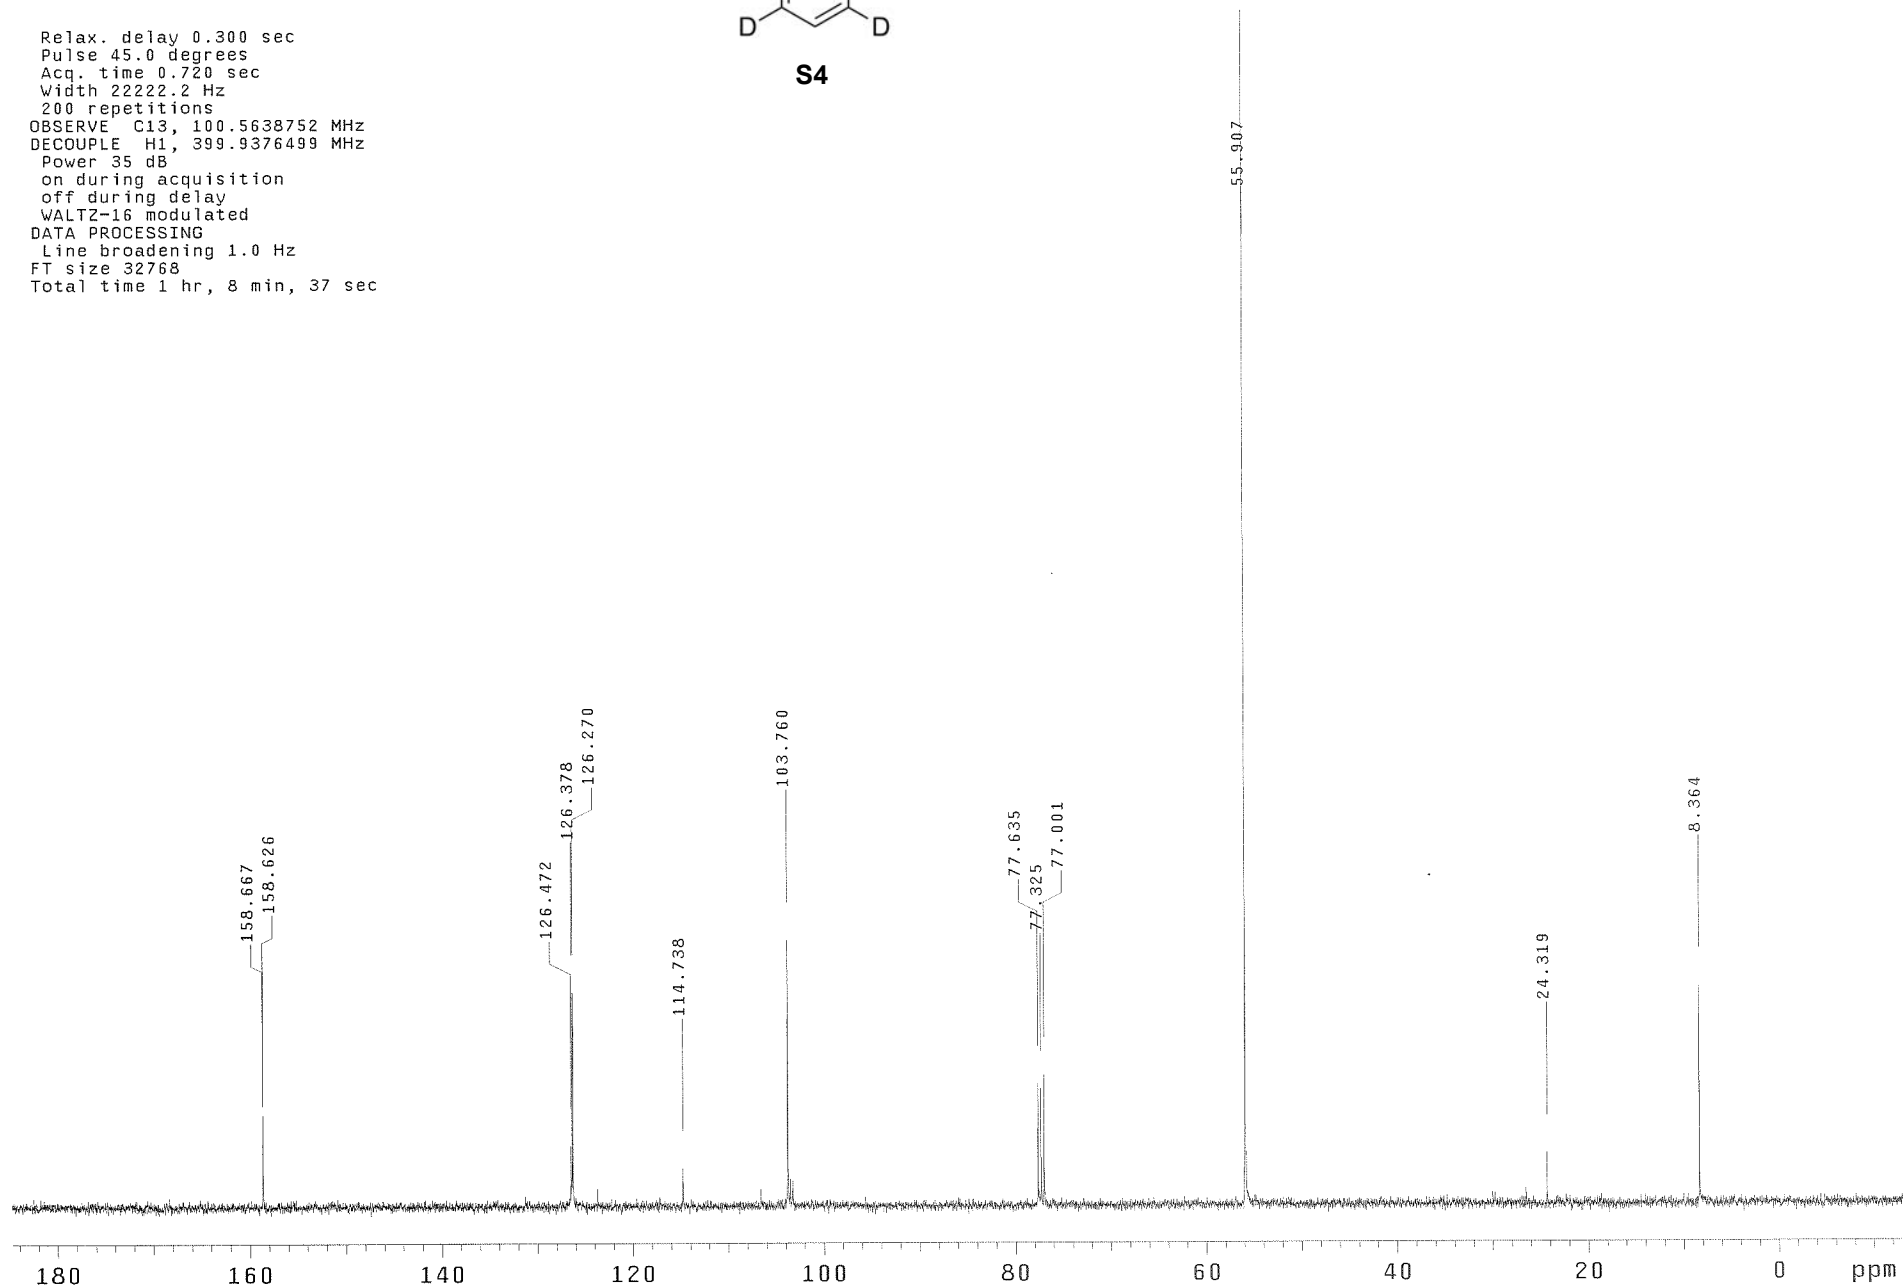

S22

zsun-IV-14-Standard-H1

Pulse Sequence: s2pu1

Solvent: cdc13

Temp. 25.0 C / 298.1 K

INOVA-400 "vnmr400"

Relax. delay 0.300 sec

Pulse 45.0 degrees

Acq. time 3.334 sec

Width 4662.0 Hz

32 repetitions

OBSERVE H1, 399.9356500 MHz

DATA PROCESSING

FT size 262144

Total time 3 min, 38 sec

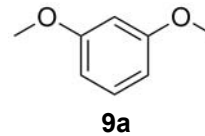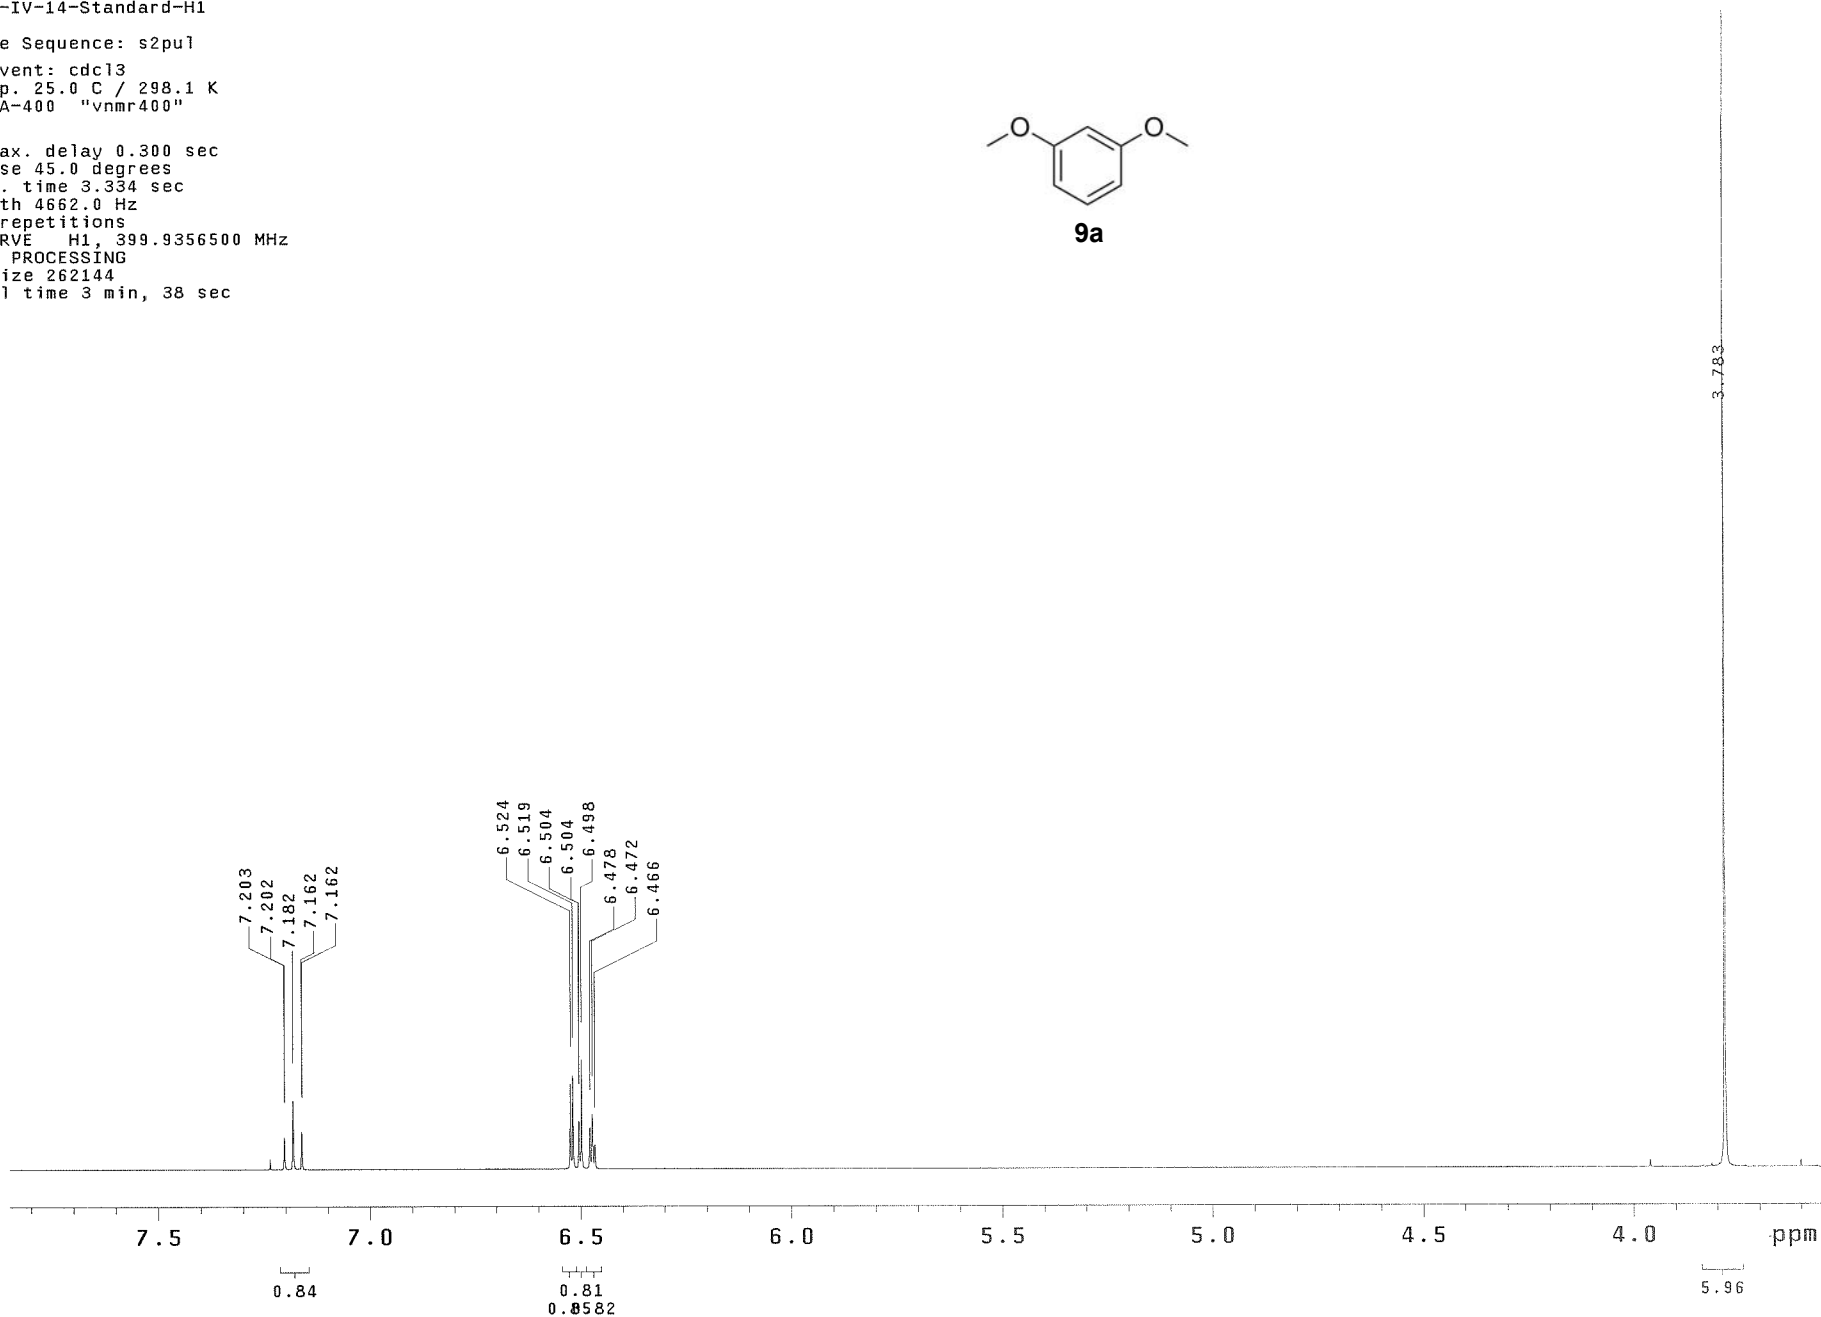

zsun-IV-14-Standard-H1

Pulse Sequence: s2pul

Solvent: cdcl3  
Temp. 25.0 C / 298.1 K  
INOVA-400 "vnmr400"

Relax. delay 0.300 sec  
Pulse 45.0 degrees  
Acq. time 3.334 sec  
Width 4662.0 Hz  
40 repetitions  
OBSERVE H1, 399.9356500 MHz  
DATA PROCESSING  
FT size 262144  
Total time 3 min, 38 sec

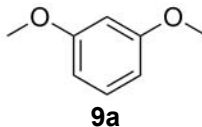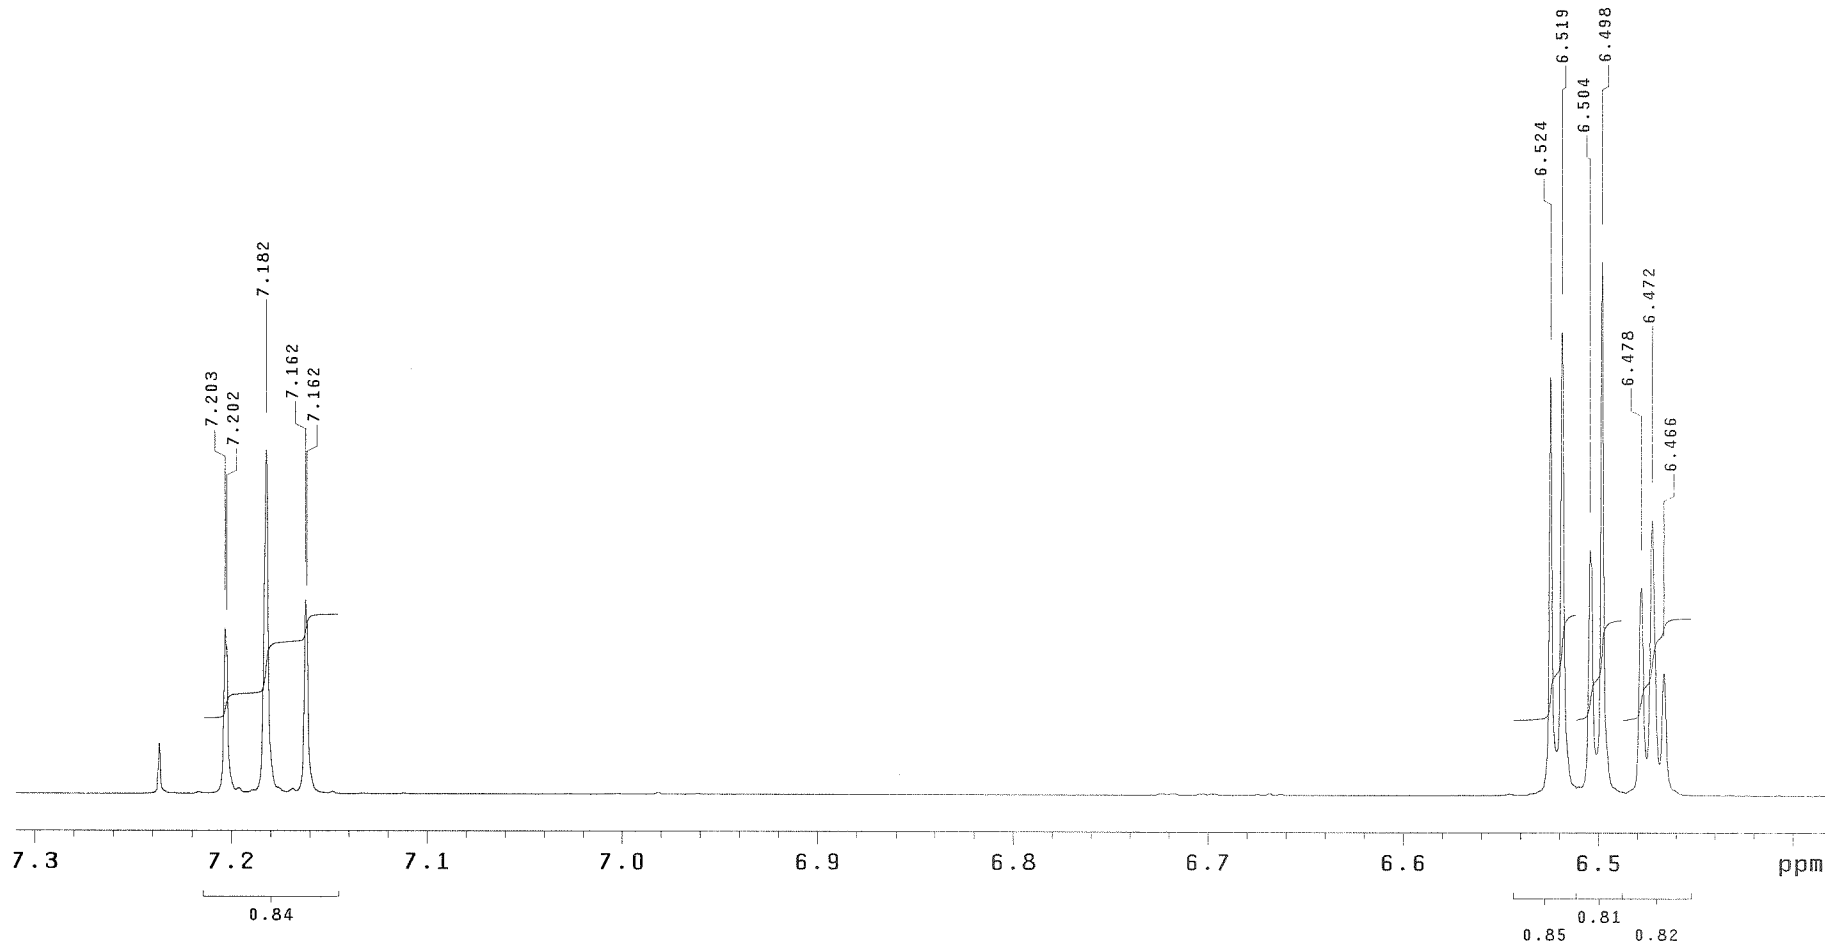



zsun-IV-14-Standard-C13

Pulse Sequence: s2pu1

Solvent: CDCl3

Temp. 25.0 C / 298.1 K

INOVA-400 "vnmr400"

Relax. delay 0.300 sec

Pulse 45.0 degrees

Acq. time 0.720 sec

Width 22222.2 Hz

200 repetitions

OBSERVE C13, 100.5638752 MHz

DECOUPLE H1, 399.9376499 MHz

Power 35 dB

on during acquisition

off during delay

WALTZ-16 modulated

DATA PROCESSING

Line broadening 1.0 Hz

FT size 32768

Total time 6 min, 53 sec

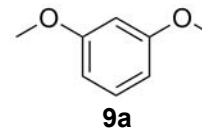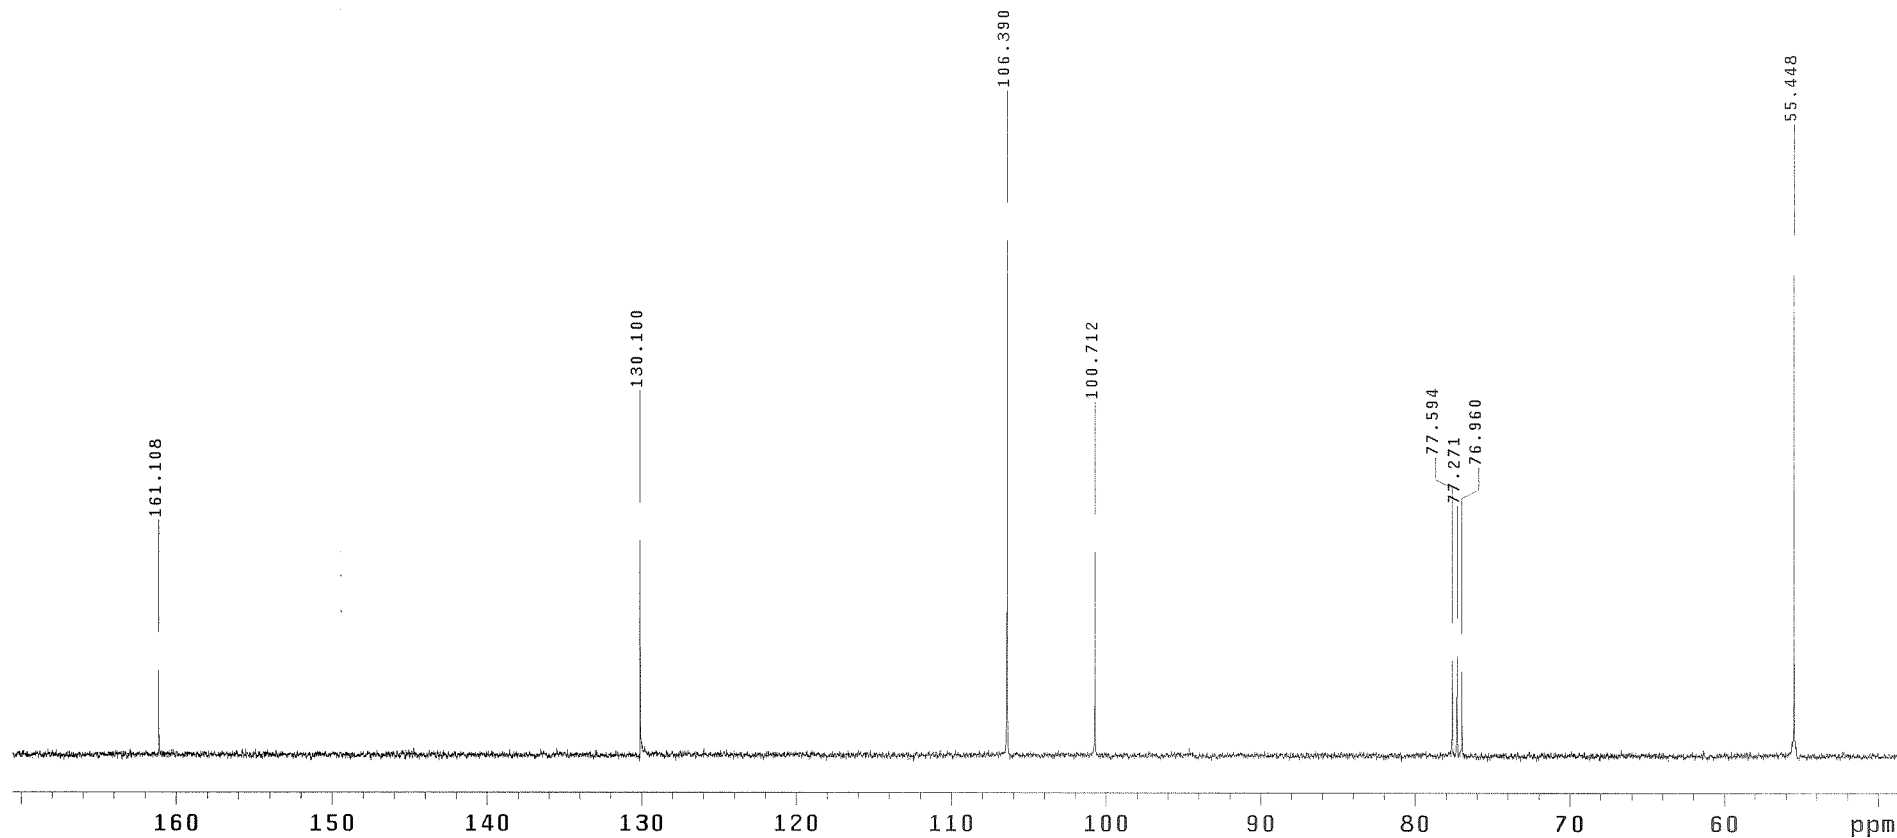

zsun-IV-68-H1

Pulse Sequence: s2pu1

Solvent: cdcl3

Temp. 25.0 C / 298.1 K

INOVA-400 "vnmr400"

Relax. delay 0.300 sec

Pulse 45.0 degrees

Acq. time 3.334 sec

Width 4662.0 Hz

60 repetitions

OBSERVE H1, 399.9356500 MHz

DATA PROCESSING

FT size 262144

Total time 3 min, 38 sec

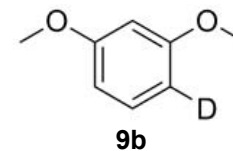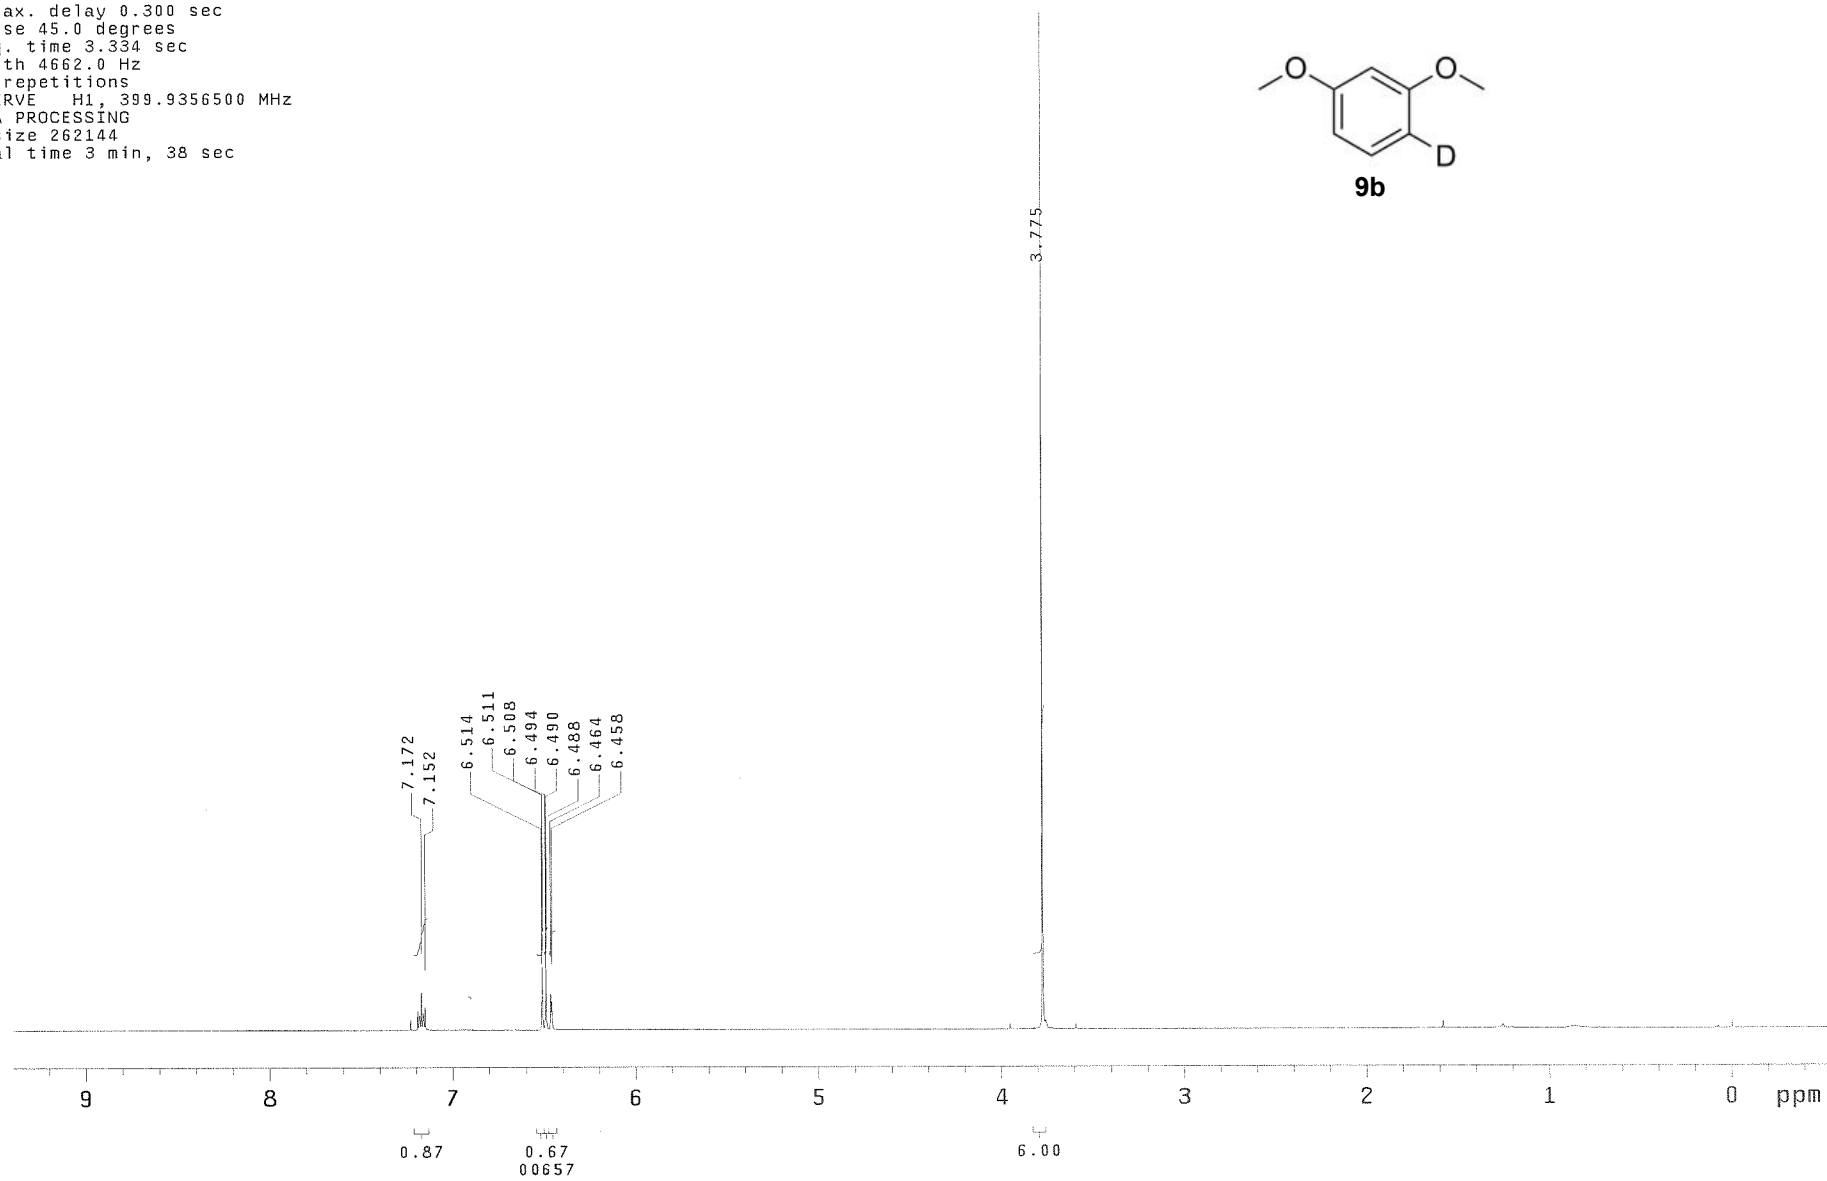

zsun-IV-68-H1

Pulse Sequence: s2pu1

Solvent: cdcl3  
Temp. 25.0 C / 298.1 K  
INOVA-400 "vnmr400"

Relax. delay 0.300 sec  
Pulse 45.0 degrees  
Acq. time 3.334 sec  
Width 4662.0 Hz  
60 repetitions  
OBSERVE H1, 399.9356500 MHz  
DATA PROCESSING  
FT size 262144  
Total time 3 min, 38 sec

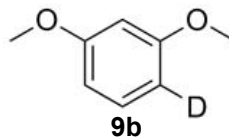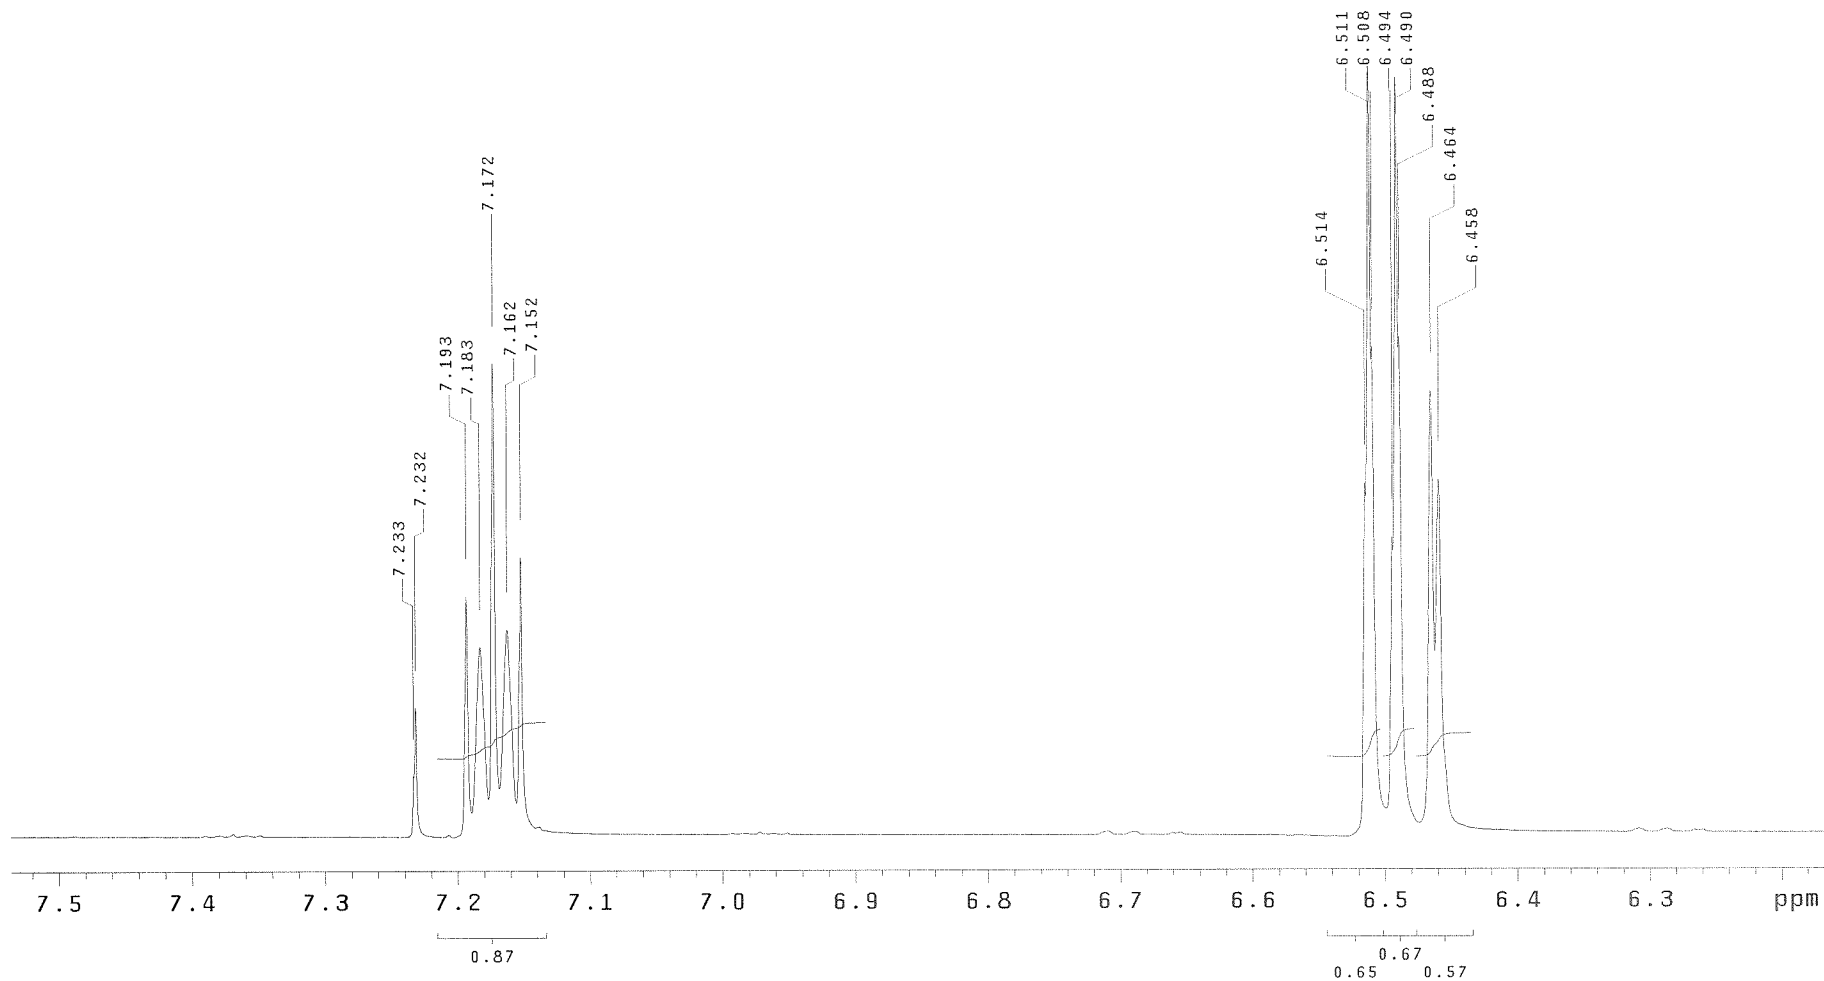

zsun-IV-68-H2

Pulse Sequence: s2pu1

Solvent: CDCl3

Temp. 25.0 C / 298.1 K

Operator: zsun

INOVA-500 "vnmr500"

Pulse 16.7 degrees

Acq. time 1.334 sec

Width 1534.7 Hz

152 repetitions

OBSERVE H2, 76.7003414 MHz

DATA PROCESSING

Line broadening 1.5 Hz

FT size 4096

Total time 19 min, 52 sec

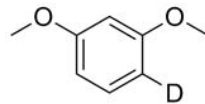

9b

6.479

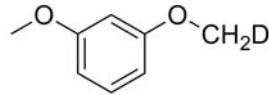

3.753

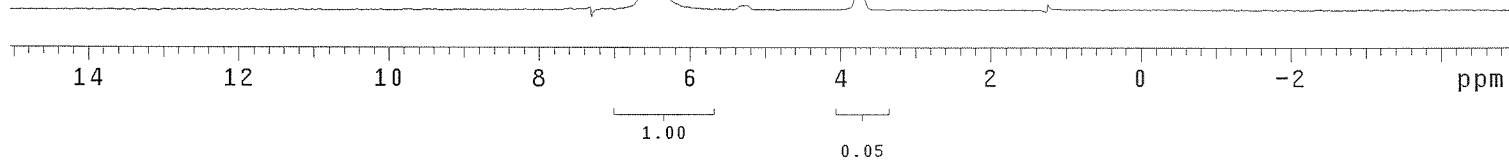

zsun-IV-68-C13

Pulse Sequence: s2pul

Solvent: CDCl3  
Temp. 25.0 C / 298.1 K  
INOVA-400 "vnmr400"

Relax. delay 0.300 sec  
Pulse 45.0 degrees  
Acq. time 0.720 sec  
Width 22222.2 Hz  
268 repetitions  
OBSERVE C13, 100.5638752 MHz  
DECOUPLE H1, 399.9376499 MHz  
Power 35 dB  
on during acquisition  
off during delay  
WALTZ-16 modulated  
DATA PROCESSING  
Line broadening 1.0 Hz  
FT size 32768  
Total time 51 min, 28 sec

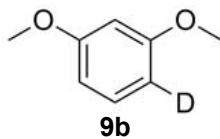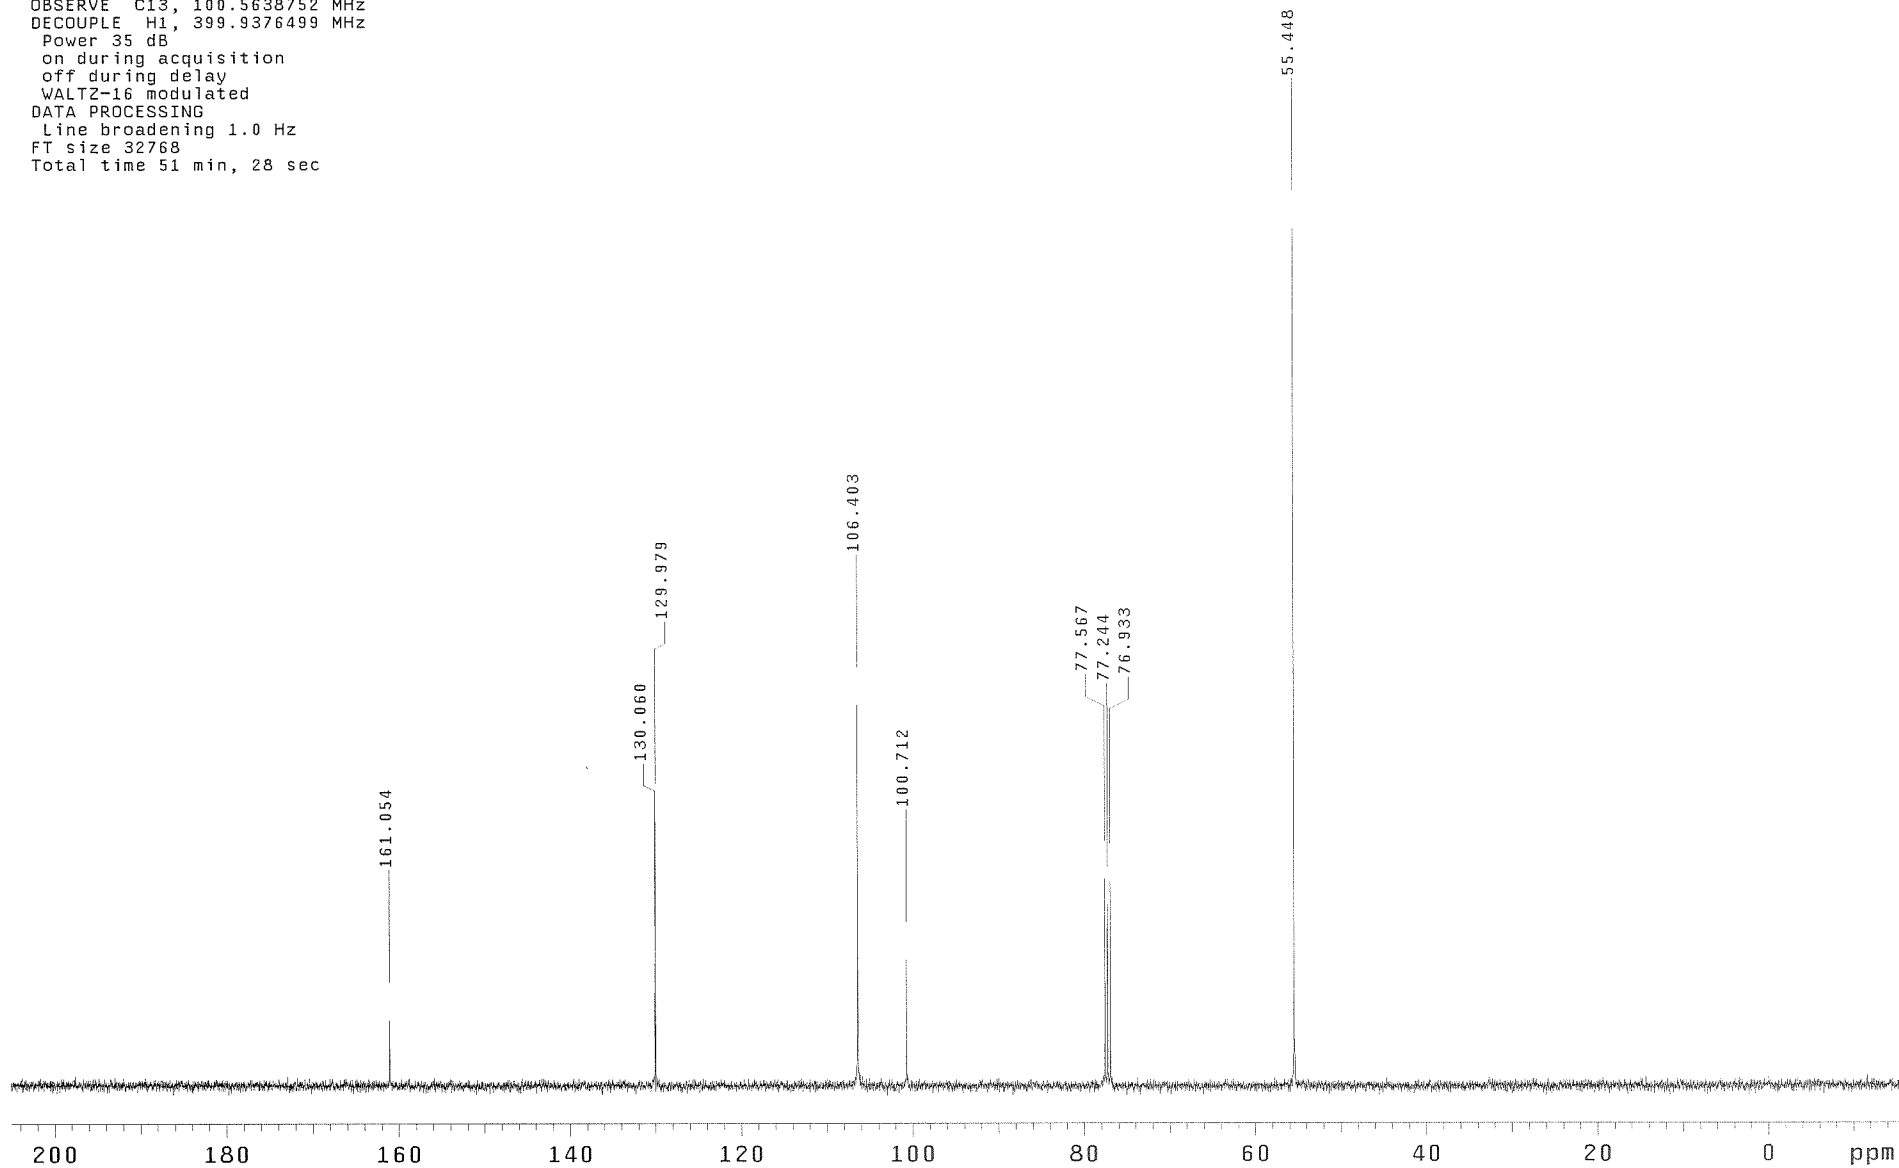

S29

zsun-iv-79-H1

Pulse Sequence: s2pu1

Solvent: cdc13  
Temp. 25.0 C / 298.1 K  
INNOVA-400 "vnmr400"

Relax. delay 0.300 sec  
Pulse 45.0 degrees  
Acq. time 3.334 sec  
Width 4662.0 Hz  
60 repetitions  
OBSERVE H1, 399.9356500 MHz  
DATA PROCESSING  
F1 size 262144  
Total time 3 min, 38 sec

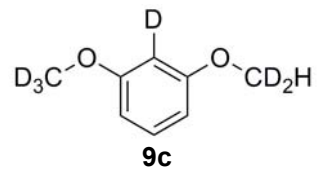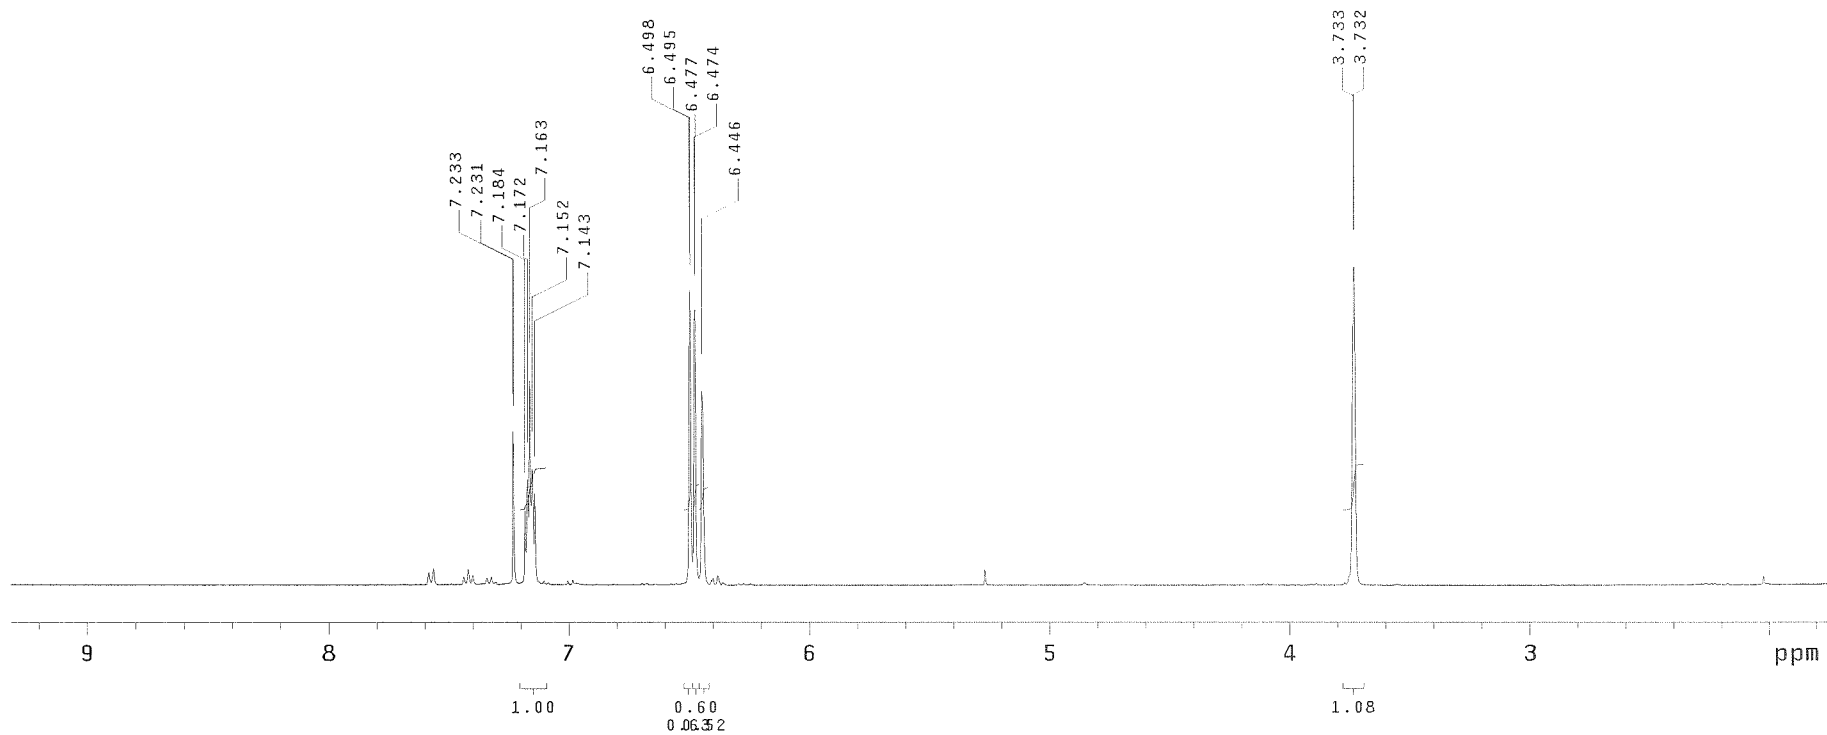

zsun-iv-79-H1

Pulse Sequence: s2pu1

Solvent: cdcl3

Temp. 25.0 C / 298.1 K

INOVA-400 "vnmr400"

Relax. delay 0.300 sec

Pulse 45.0 degrees

Acq. time 3.334 sec

Width 4662.0 Hz

60 repetitions

OBSERVE H1, 399.9356500 MHz

DATA PROCESSING

FT size 262144

Total time 3 min, 38 sec

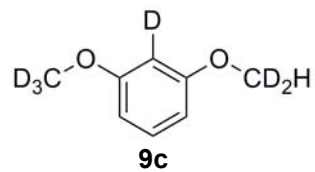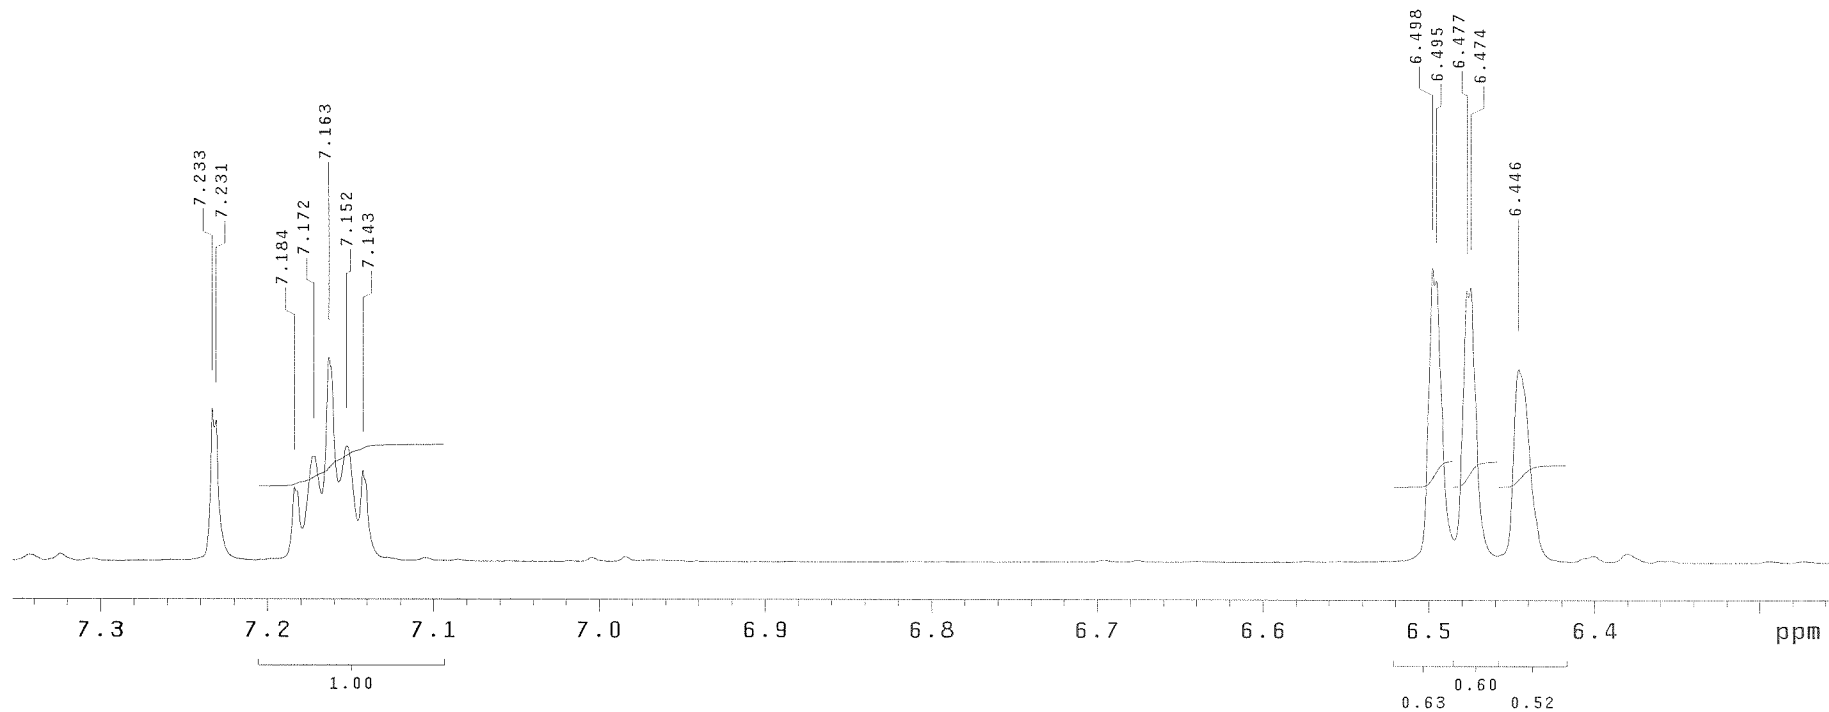

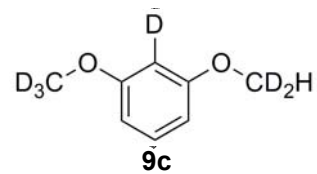

zsun-IV-79-H2

Pulse Sequence: s2pu1

Solvent: CDC13

Temp. 25.0 C / 298.1 K

Operator: zsun

File: zsun-IV-79-H2

INOVA-500 "vnmr500"

Pulse 16.7 degrees

Acq. time 1.334 sec

Width 1534.7 Hz

209 repetitions

OBSERVE H2, 76.7006894 MHz

DATA PROCESSING

Line broadening 1.0 Hz

FT size 4096

Total time 2 hr, 59 min, 7 sec

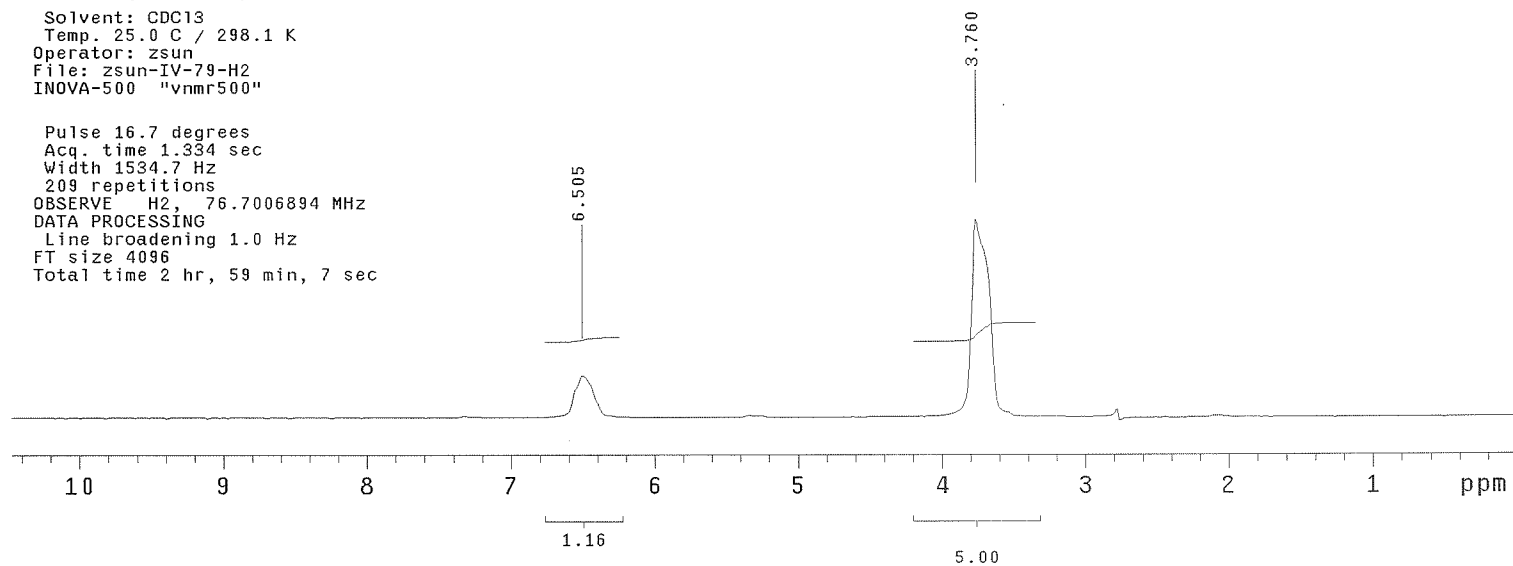



zsun-IV-79-C13

Pulse Sequence: s2pu1

Solvent: CDCl3

Temp. 25.0 C / 298.1 K

INNOVA-400 "vnmr400"

Relax. delay 0.300 sec

Pulse 45.0 degrees

Acq. time 0.720 sec

Width 22222.2 Hz

728 repetitions

OBSERVE C13, 100.5638752 MHz

DECOUPLE H1, 399.9376499 MHz

Power 35 dB

on during acquisition

off during delay

WALTZ-16 modulated

DATA PROCESSING

Line broadening 1.0 Hz

FT size 32768

Total time 1 hr, 42 min, 55 sec

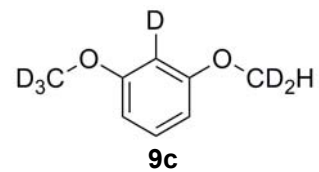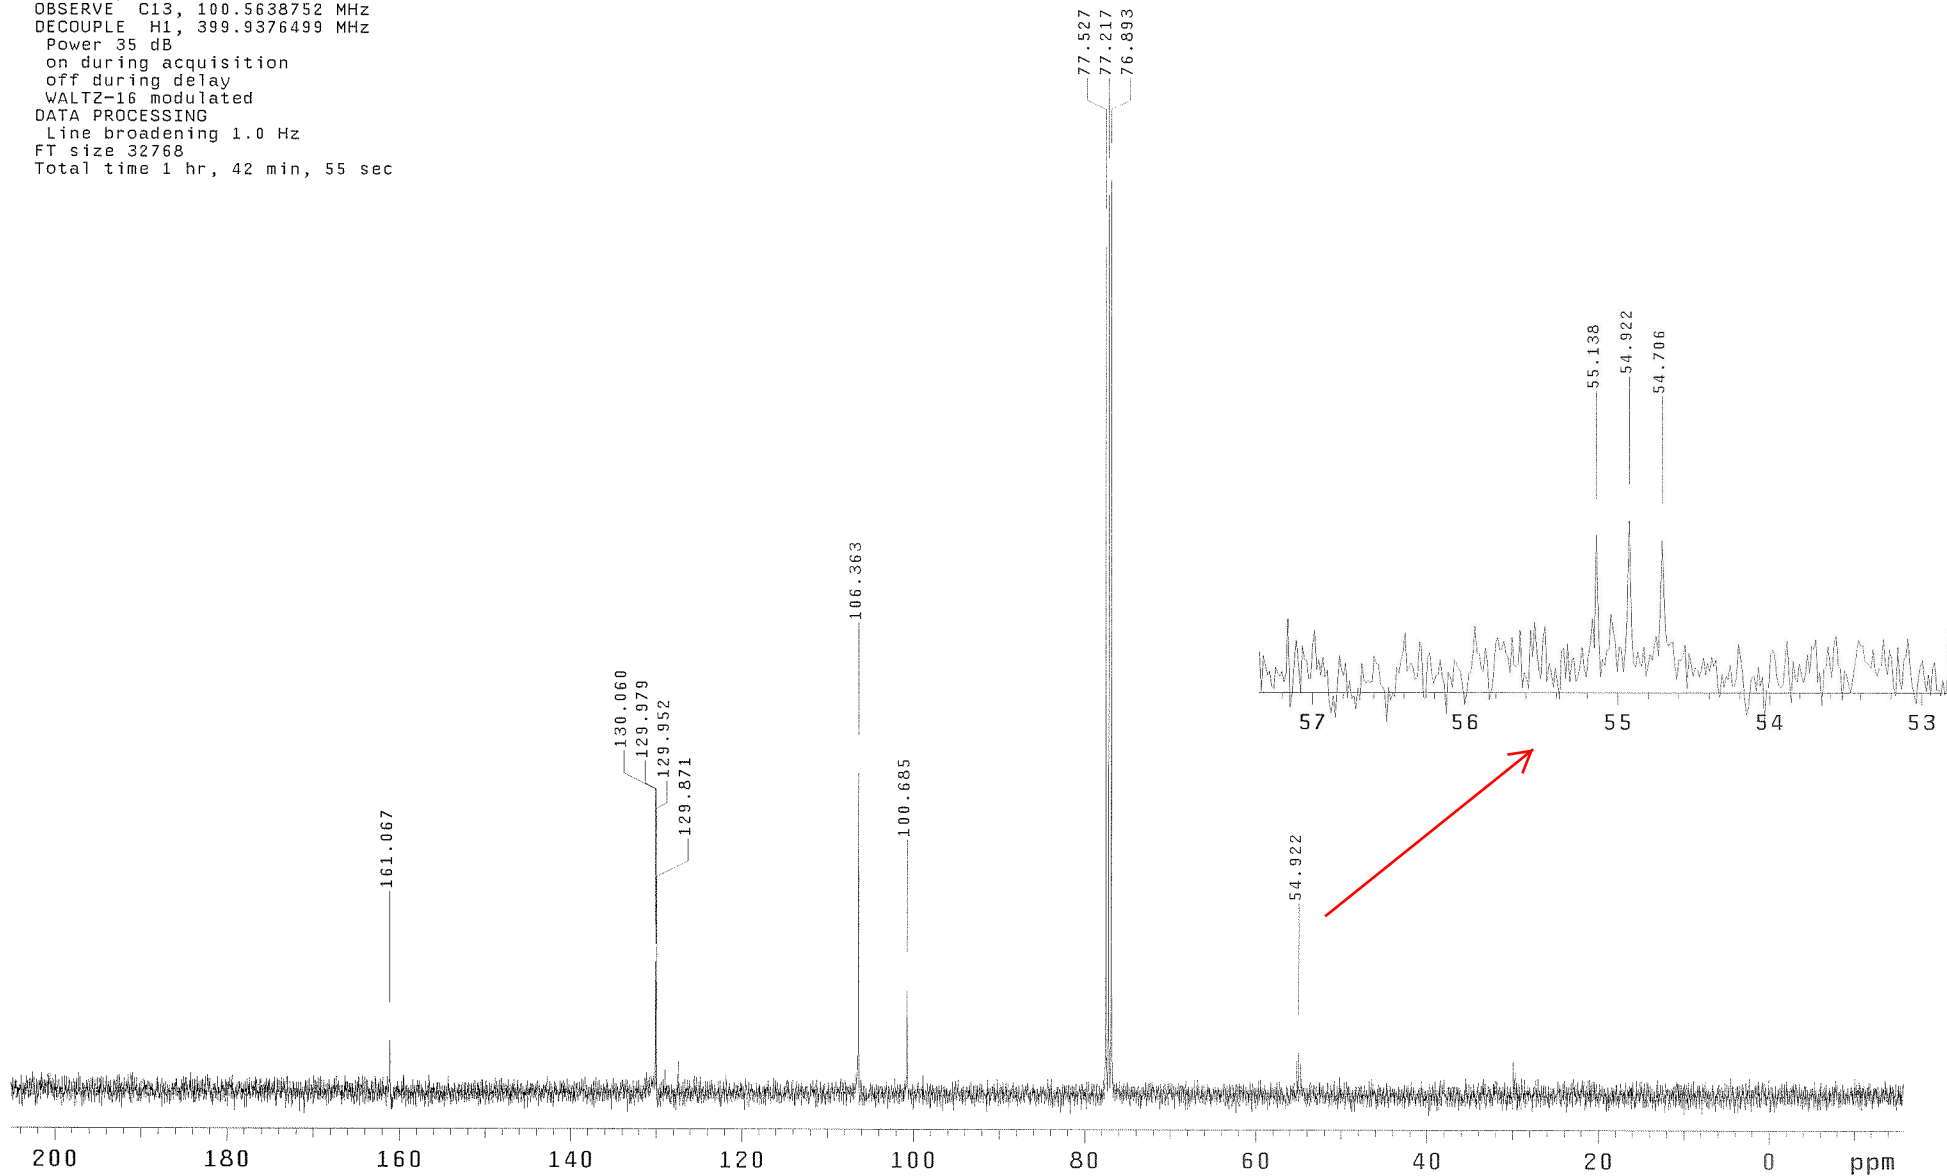

S33

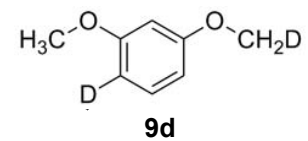

zsun-85-1-H1

Sample directory: proton=test\_02Mar2000  
File: PROTON

Pulse Sequence: s2pu1

Solvent: cdc13  
Temp. 25.0 C / 298.1 K  
Operator: zsun  
INOVA-500 "vnmr500"

Relax. delay 0.300 sec  
Pulse 45.0 degrees  
Acq. time 2.908 sec  
Width 6500.9 Hz  
60 repetitions  
OBSERVE H1, 499.6567083 MHz  
DATA PROCESSING  
Line broadening 0.3 Hz  
FT size 65536  
Total time 3 min, 13 sec

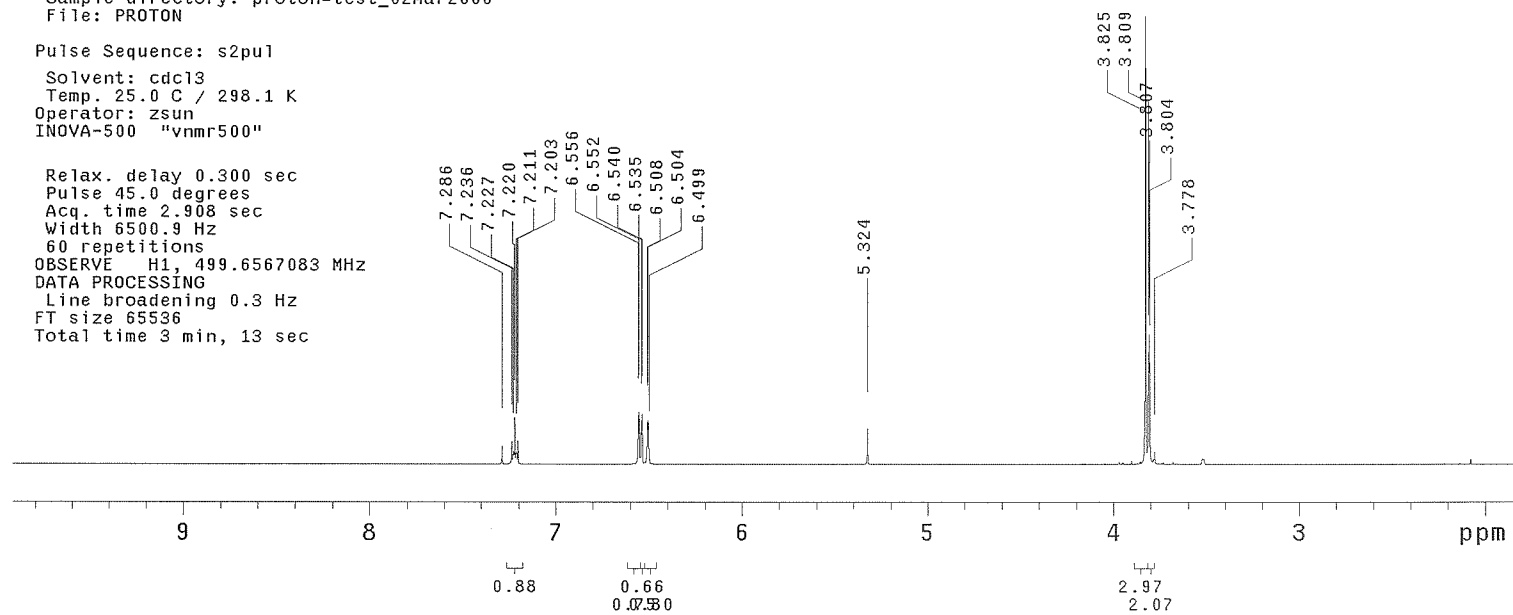

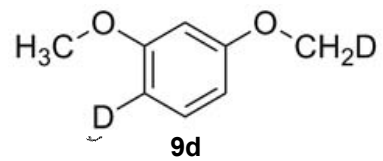

zsun-IV-85-1-H2

Pulse Sequence: s2pul

Solvent: CDCl3

Temp. 25.0 C / 298.1 K

Operator: zsun

INOVA-500 "vnmr500"

Pulse 16.7 degrees

Acq. time 1.334 sec

Width 1534.7 Hz

382 repetitions

OBSERVE H2, 76.7004968 MHz

DATA PROCESSING

Line broadening 1.5 Hz

FT size 4096

Total time 19 min, 52 sec

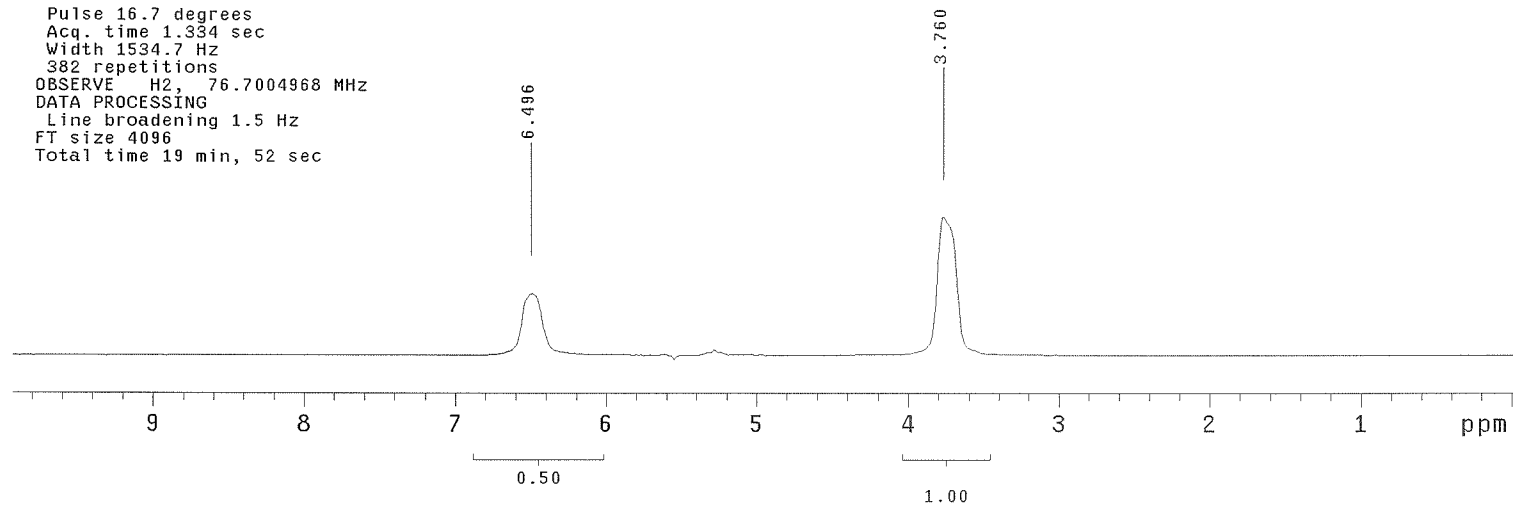

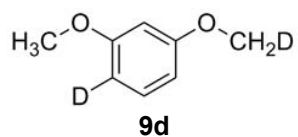

zsun-85-1-H1

Sample directory: proton=test\_02Mar2000  
File: PROTON

Pulse Sequence: s2pu1

Solvent: cdc13  
Temp. 25.0 C / 298.1 K  
Operator: Zsun  
INOVA-500 "vnmr500"

Relax. delay 0.300 sec  
Pulse 45.0 degrees  
Acq. time 2.908 sec  
Width 6500.9 Hz  
60 repetitions  
OBSERVE H1, 499.6567083 MHz  
DATA PROCESSING  
Line broadening 0.3 Hz  
FT size 65536  
Total time 3 min, 13 sec

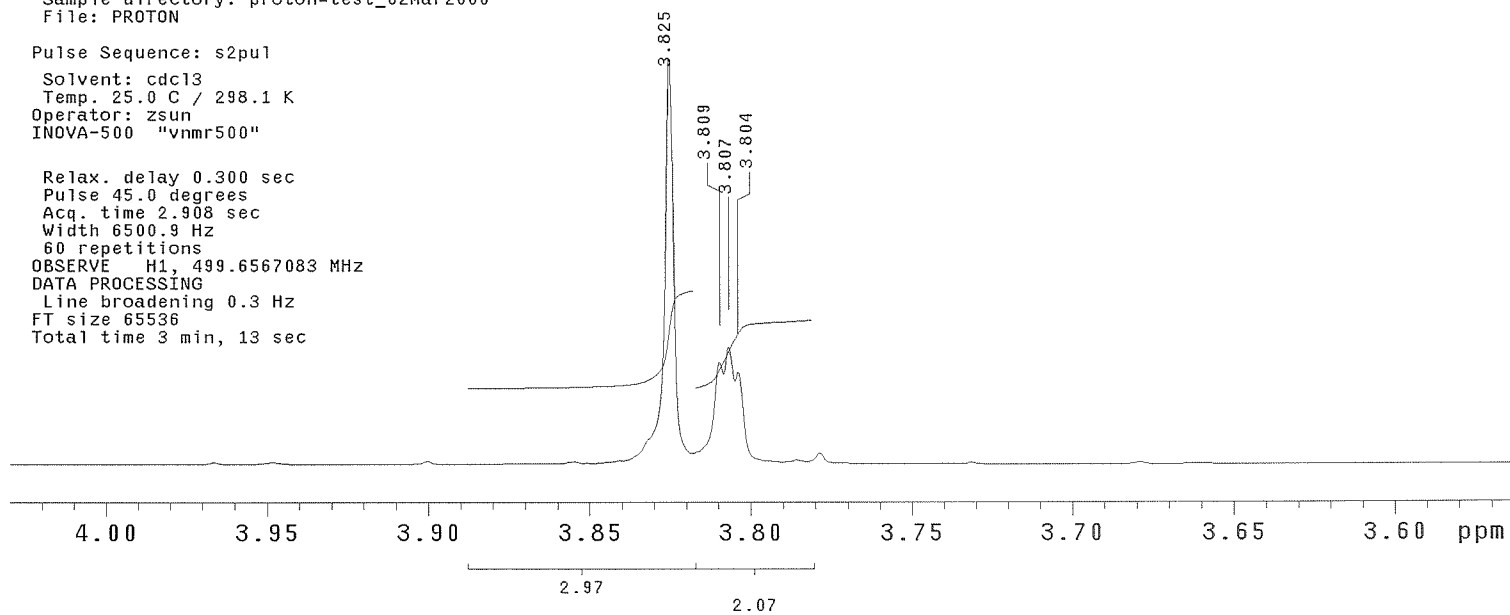

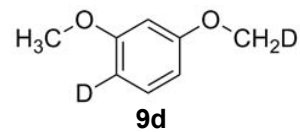

zsun-85-1-H1

Sample directory: proton=test\_02Mar2000  
File: PROTON

Pulse Sequence: s2pu1

Solvent: cdc13  
Temp. 25.0 C / 298.1 K  
Operator: zsun  
INOVA-500 "vnmr500"

Relax. delay 0.300 sec  
Pulse 45.0 degrees  
Acq. time 2.908 sec  
Width 6500.9 Hz  
60 repetitions  
OBSERVE H1, 499.6567083 MHz  
DATA PROCESSING  
Line broadening 0.3 Hz  
FT size 65536  
Total time 3 min, 13 sec

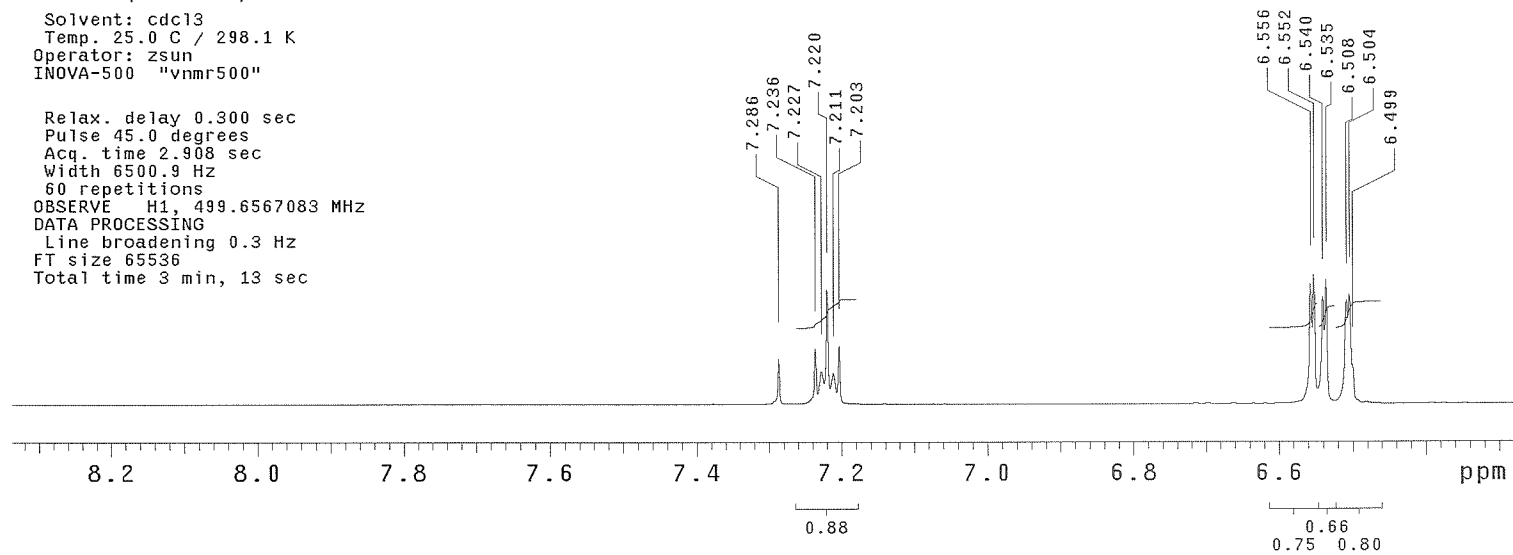

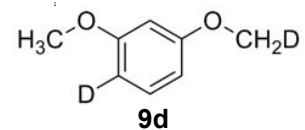

zsun-IV-85-1-C13

Sample directory: eb-chloroform\_01Mar2000  
File: CARBON

Pulse Sequence: s2pu1

Solvent: CDC13  
Temp. 25.0 C / 298.1 K  
Operator: zsun  
INOVA-500 "vnmr500"

Relax. delay 0.300 sec  
Pulse 45.0 degrees  
Acq. time 0.579 sec  
Width 27643.4 Hz  
172 repetitions  
OBSERVE C13, 125.6387492 MHz  
DECOUPLE H1, 499.6592067 MHz  
Power 40 dB  
on during acquisition  
off during delay  
WALTZ-16 modulated  
DATA PROCESSING  
Line broadening 1.0 Hz  
FT size 32768  
Total time 44 min, 23 sec

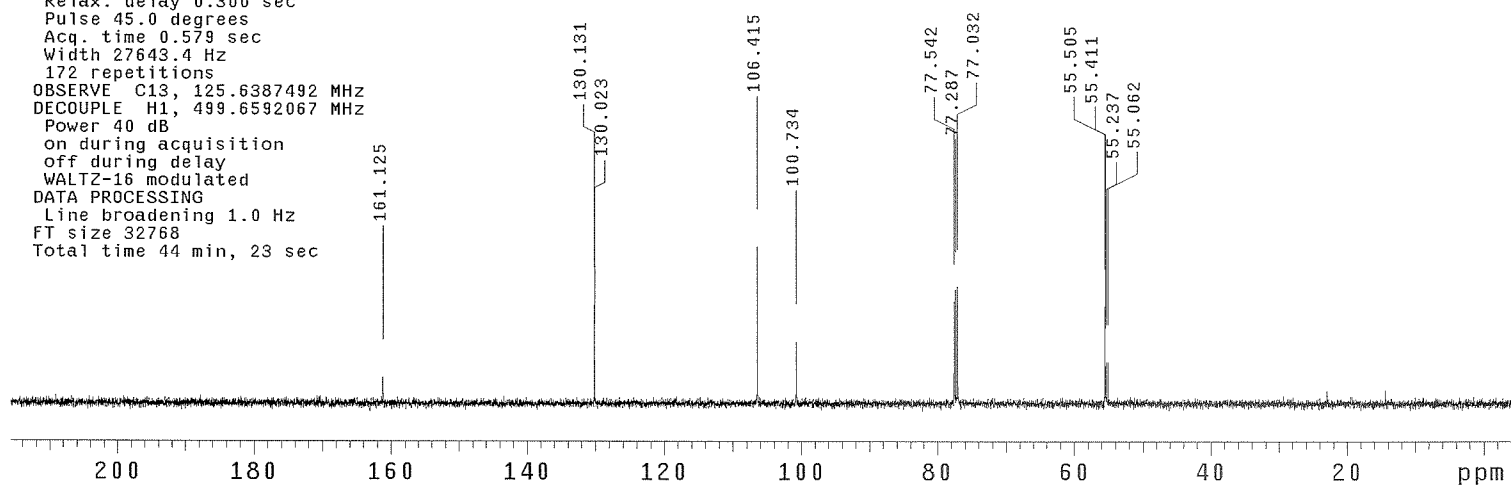

zsun-IV-60-2-H1

Pulse Sequence: s2pu1

Solvent: CDCl3

Temp. 25.0 C / 298.1 K

INOVA-400 "vnmr400"

Relax. delay 0.300 sec

Pulse 45.0 degrees

Acq. time 3.334 sec

Width 4662.0 Hz

60 repetitions

OBSERVE H1, 399.9356500 MHz

DATA PROCESSING

FT size 262144

Total time 3 min, 38 sec

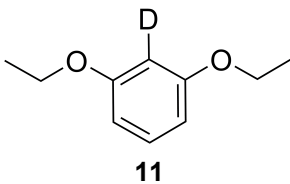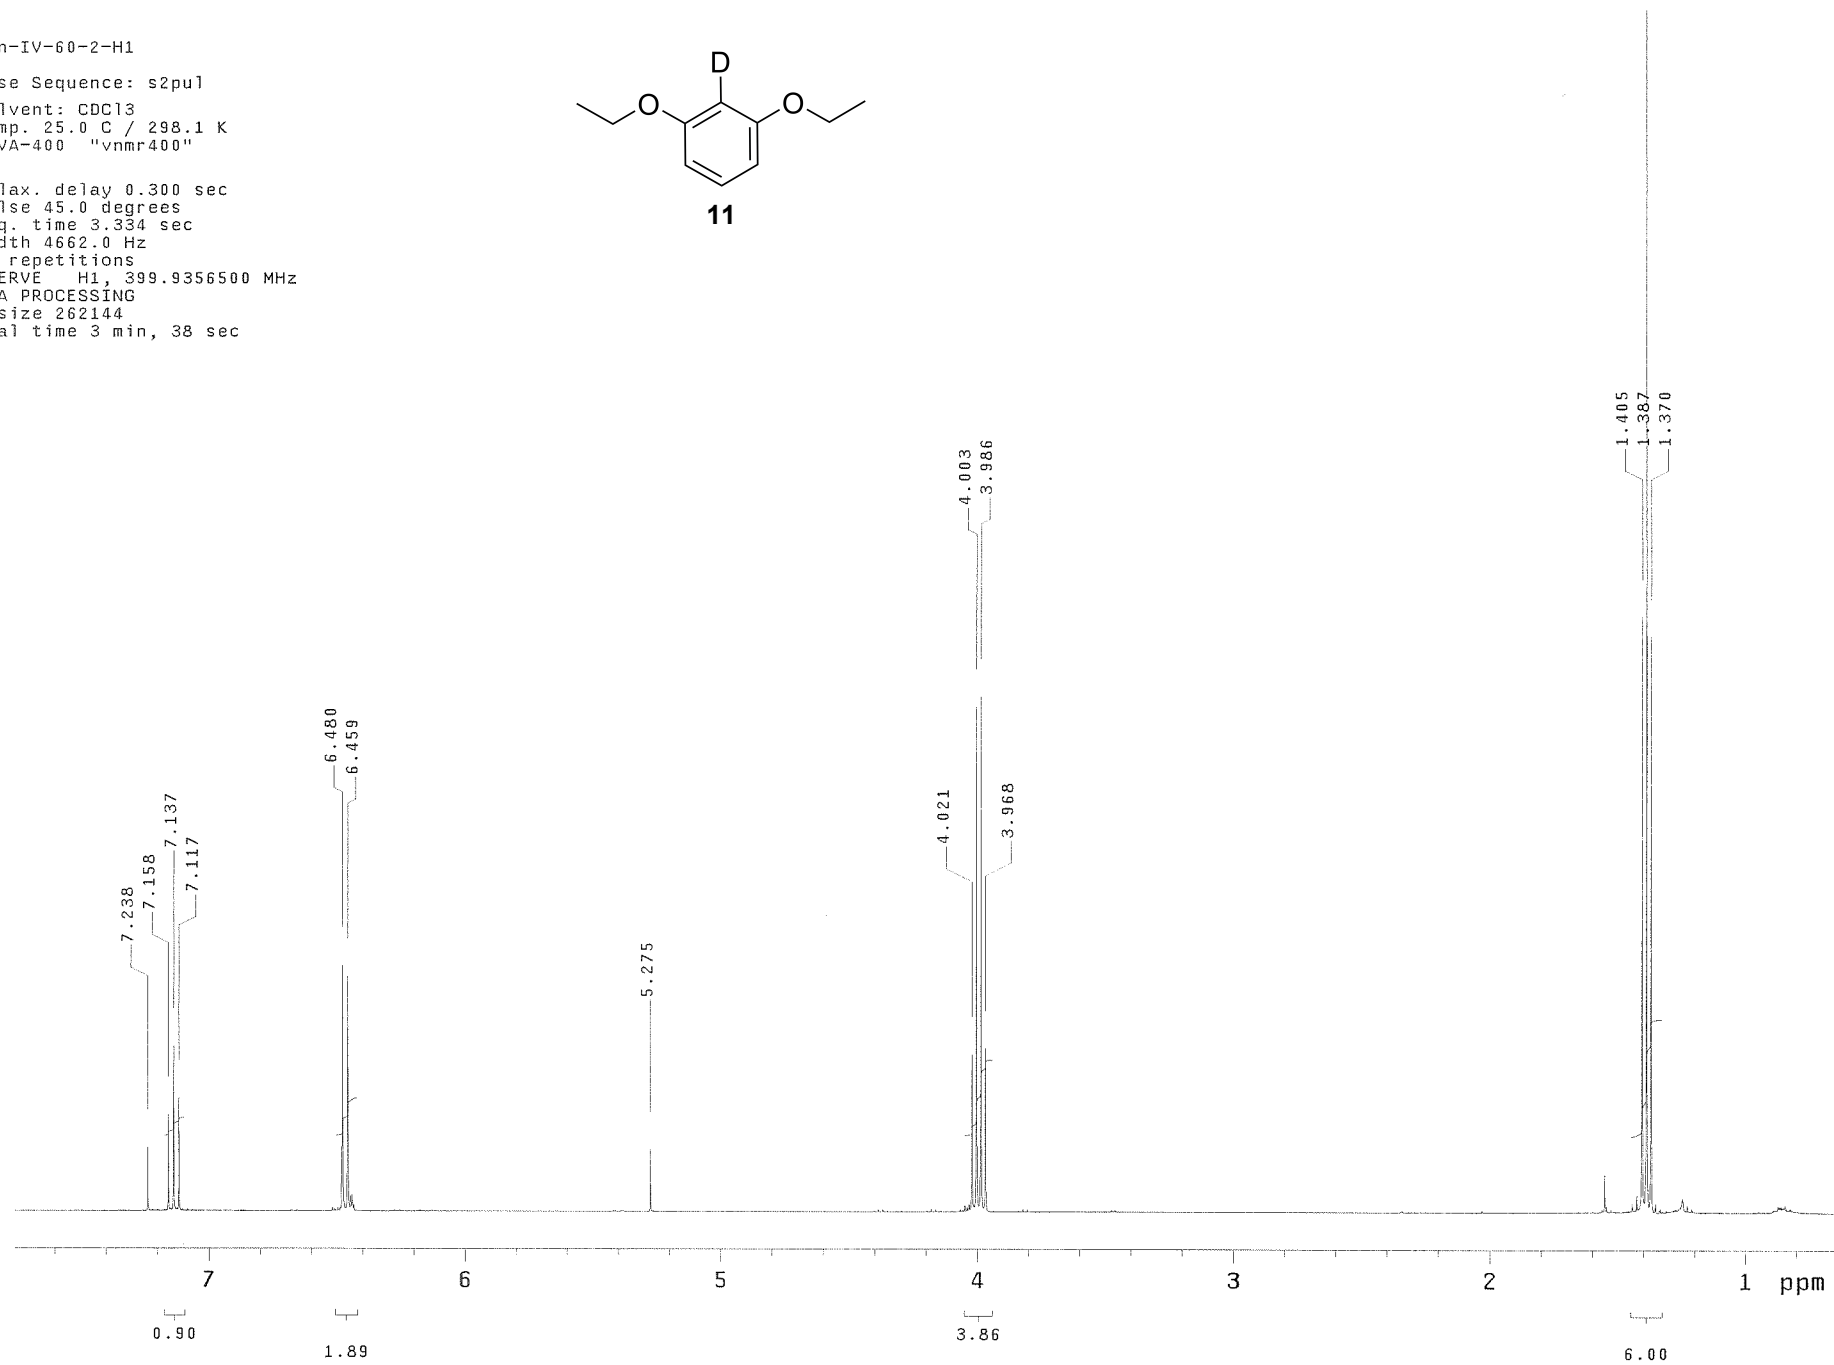

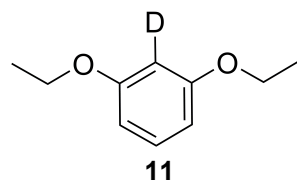

zsun-IV-60-2-H2

Pulse Sequence: s2pu1

Solvent: CDC13

Temp. 25.0 C / 298.1 K

Operator: zsun

INOVA-500 "vnmr500"

Pulse 16.7 degrees

Acq. time 1.334 sec

Width 1534.7 Hz

172 repetitions

OBSERVE H2, 76.7003431 MHz

DATA PROCESSING

Line broadening 3.0 Hz

FT size 4096

Total time 4 min, 28 sec

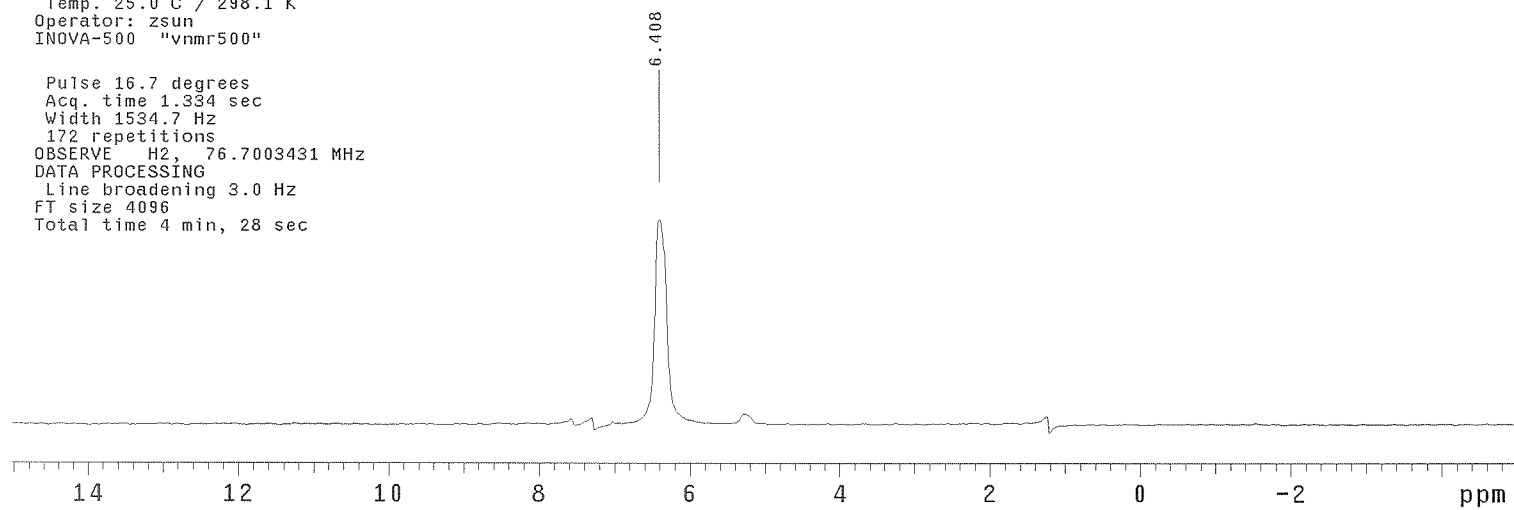



zsun-IV-60-2-C13

Pulse Sequence: s2pu1

Solvent: CDCl3  
Temp. 25.0 C / 298.1 K  
INOVA-400 "vnmr400"

Relax. delay 0.300 sec  
Pulse 45.0 degrees  
Acq. time 0.720 sec  
Width 22222.2 Hz  
384 repetitions  
OBSERVE C13, 100.5638752 MHz  
DECOUPLE H1, 399.9376499 MHz  
Power 35 dB  
on during acquisition  
off during delay  
WALTZ-16 modulated  
DATA PROCESSING  
Line broadening 1.0 Hz  
FT size 32768  
Total time 1 hr, 8 min, 37 sec

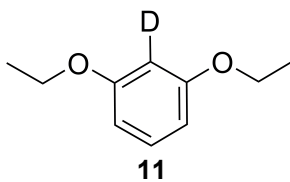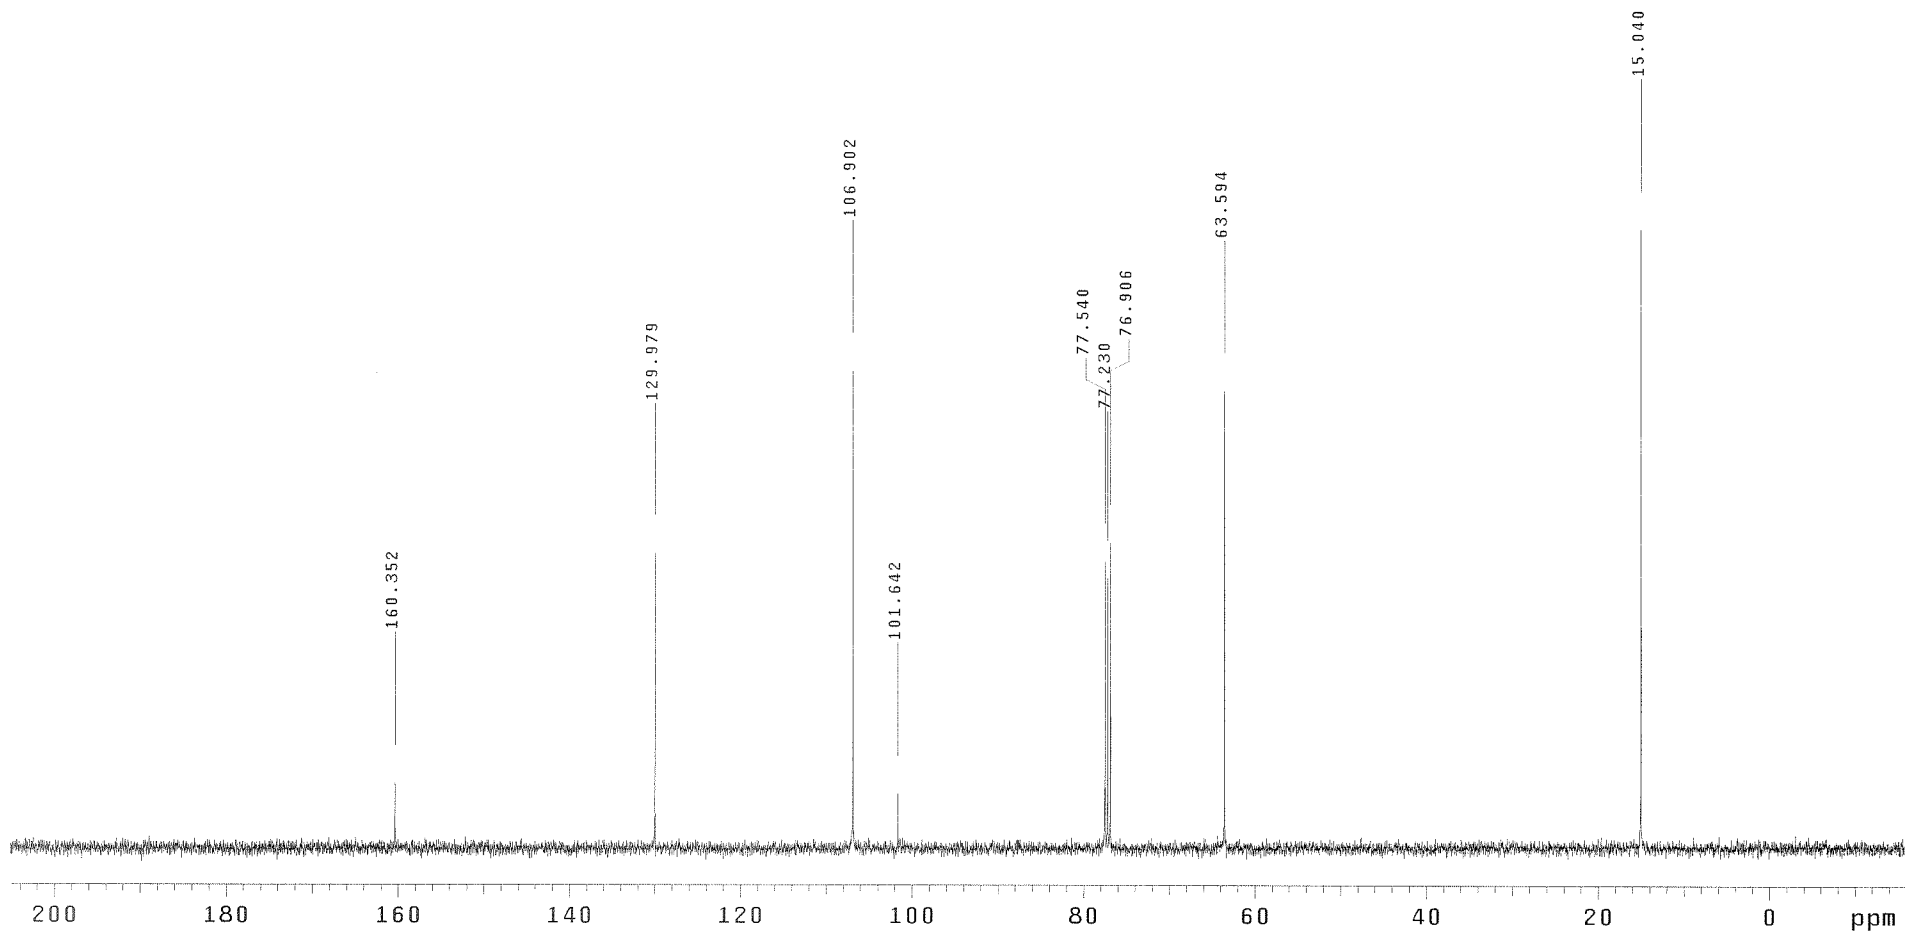

S41

zsun-III-163-1-side-product

Pulse Sequence: s2pu1

Solvent: cdcl3

Temp. 25.0 C / 298.1 K

INOVA-400 "vnmr400"

Relax. delay 0.300 sec

Pulse 45.0 degrees

Acq. time 3.334 sec

Width 4662.0 Hz

60 repetitions

OBSERVE H1, 399.9356500 MHz

DATA PROCESSING

FT size 262144

Total time 3 min, 38 sec

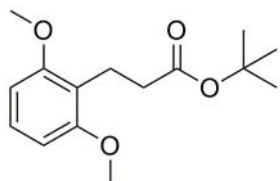

7a

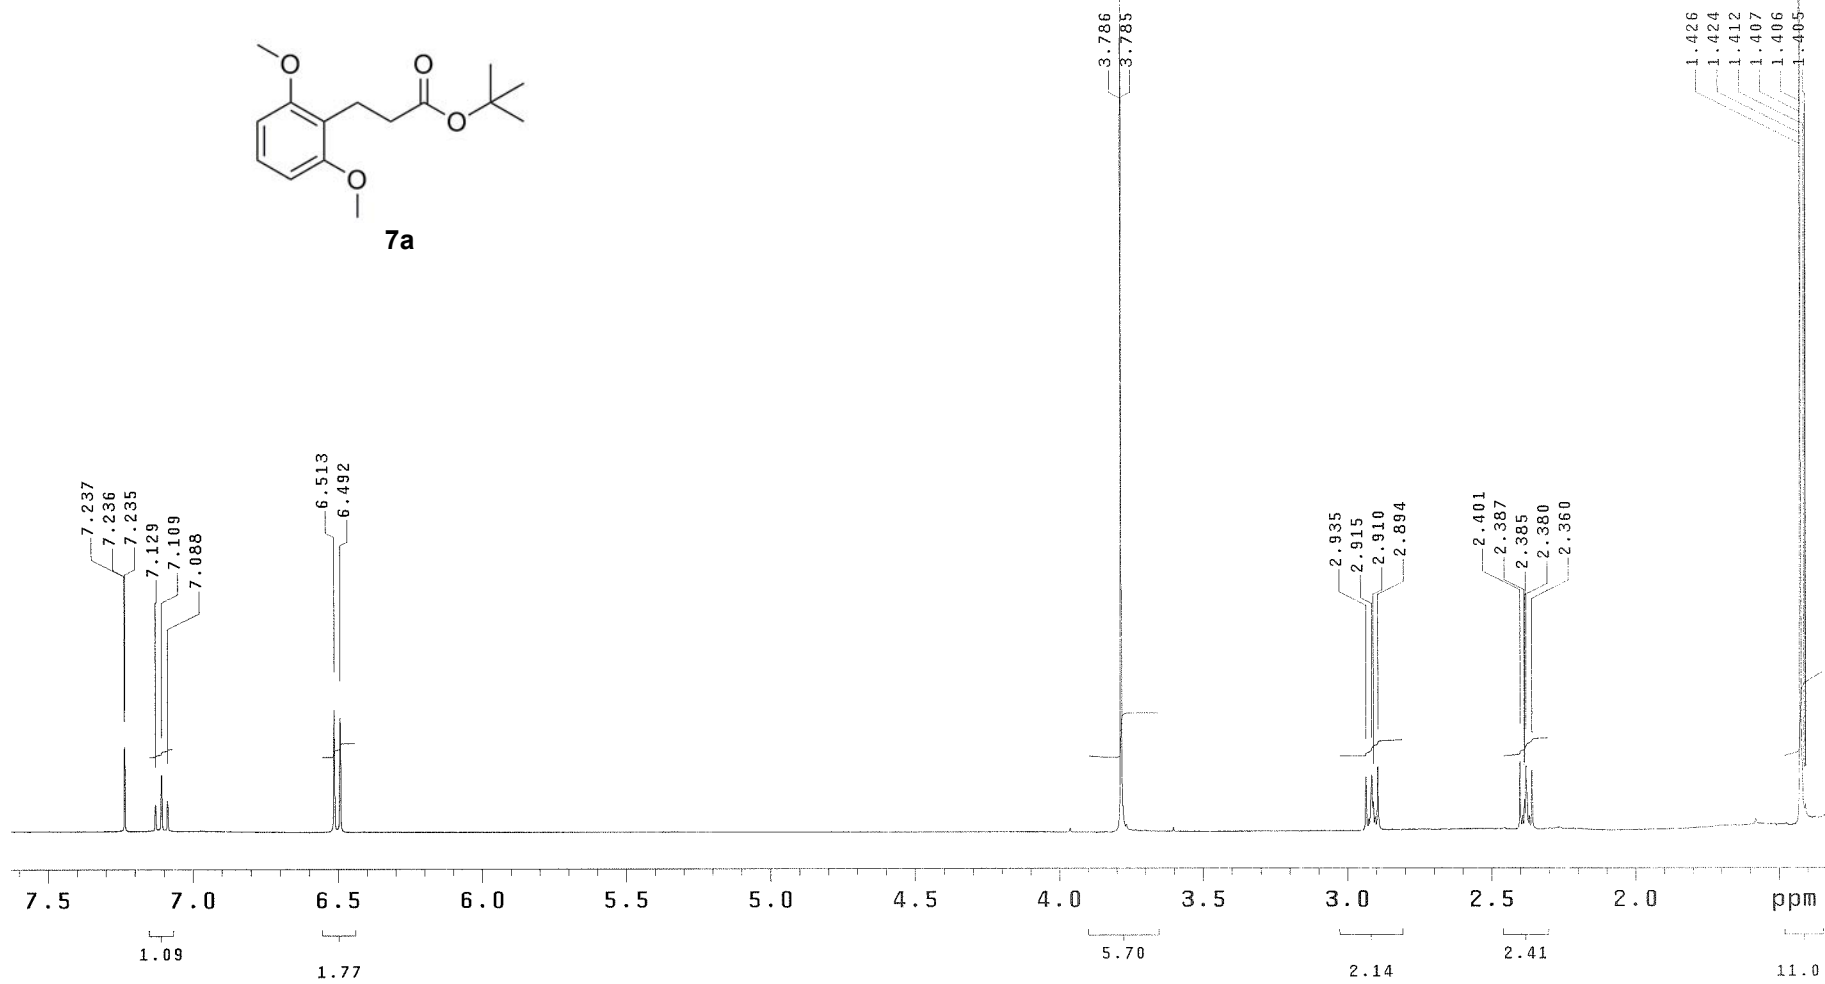

zsun-III-163-1-side-product-C13

Pulse Sequence: s2pu1

Solvent: cdcl3  
Temp. 25.0 C / 298.1 K  
INNOVA-400 "vnmr400"

Relax. delay 0.300 sec  
Pulse 45.0 degrees  
Acq. time 0.720 sec  
Width 22222.2 Hz  
476 repetitions  
OBSERVE C13, 100.5638752 MHz  
DECOUPLE H1, 399.9376499 MHz  
Power 35 dB  
on during acquisition  
off during delay  
WALTZ-16 modulated  
DATA PROCESSING  
Line broadening 1.0 Hz  
FT size 32768  
Total time 51 min, 28 sec

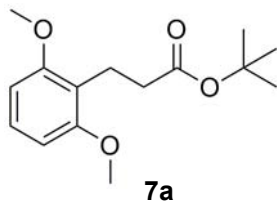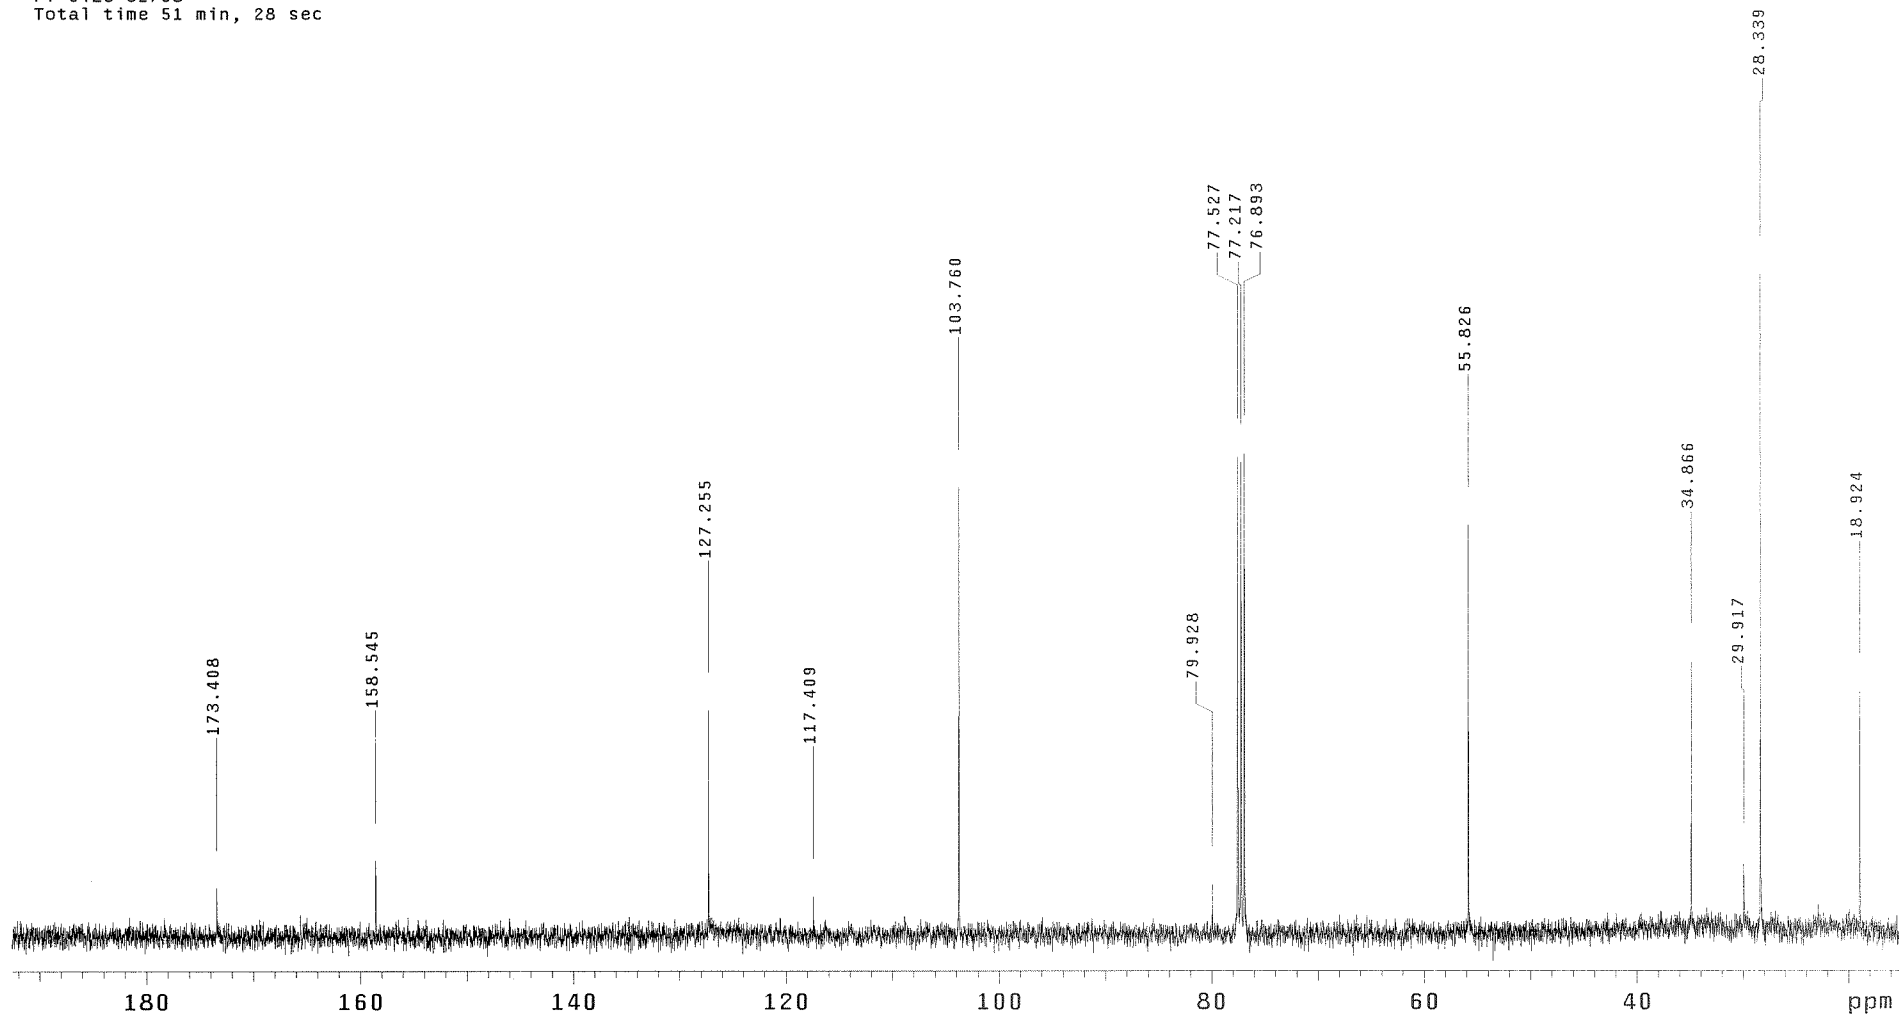

# Generic Display Report

## Analysis Info

Analysis Name D:\Bruker\data\zhosun\I-201b\1.d  
Method user-1pass\_pos\_mid.tofpar  
Sample Name I-201b  
Comment Free format commentsFree format commentsFree format comments

Acquisition Date 12/9/2009 2:00:50 PM

Operator operator name  
Instrument BioTOF II

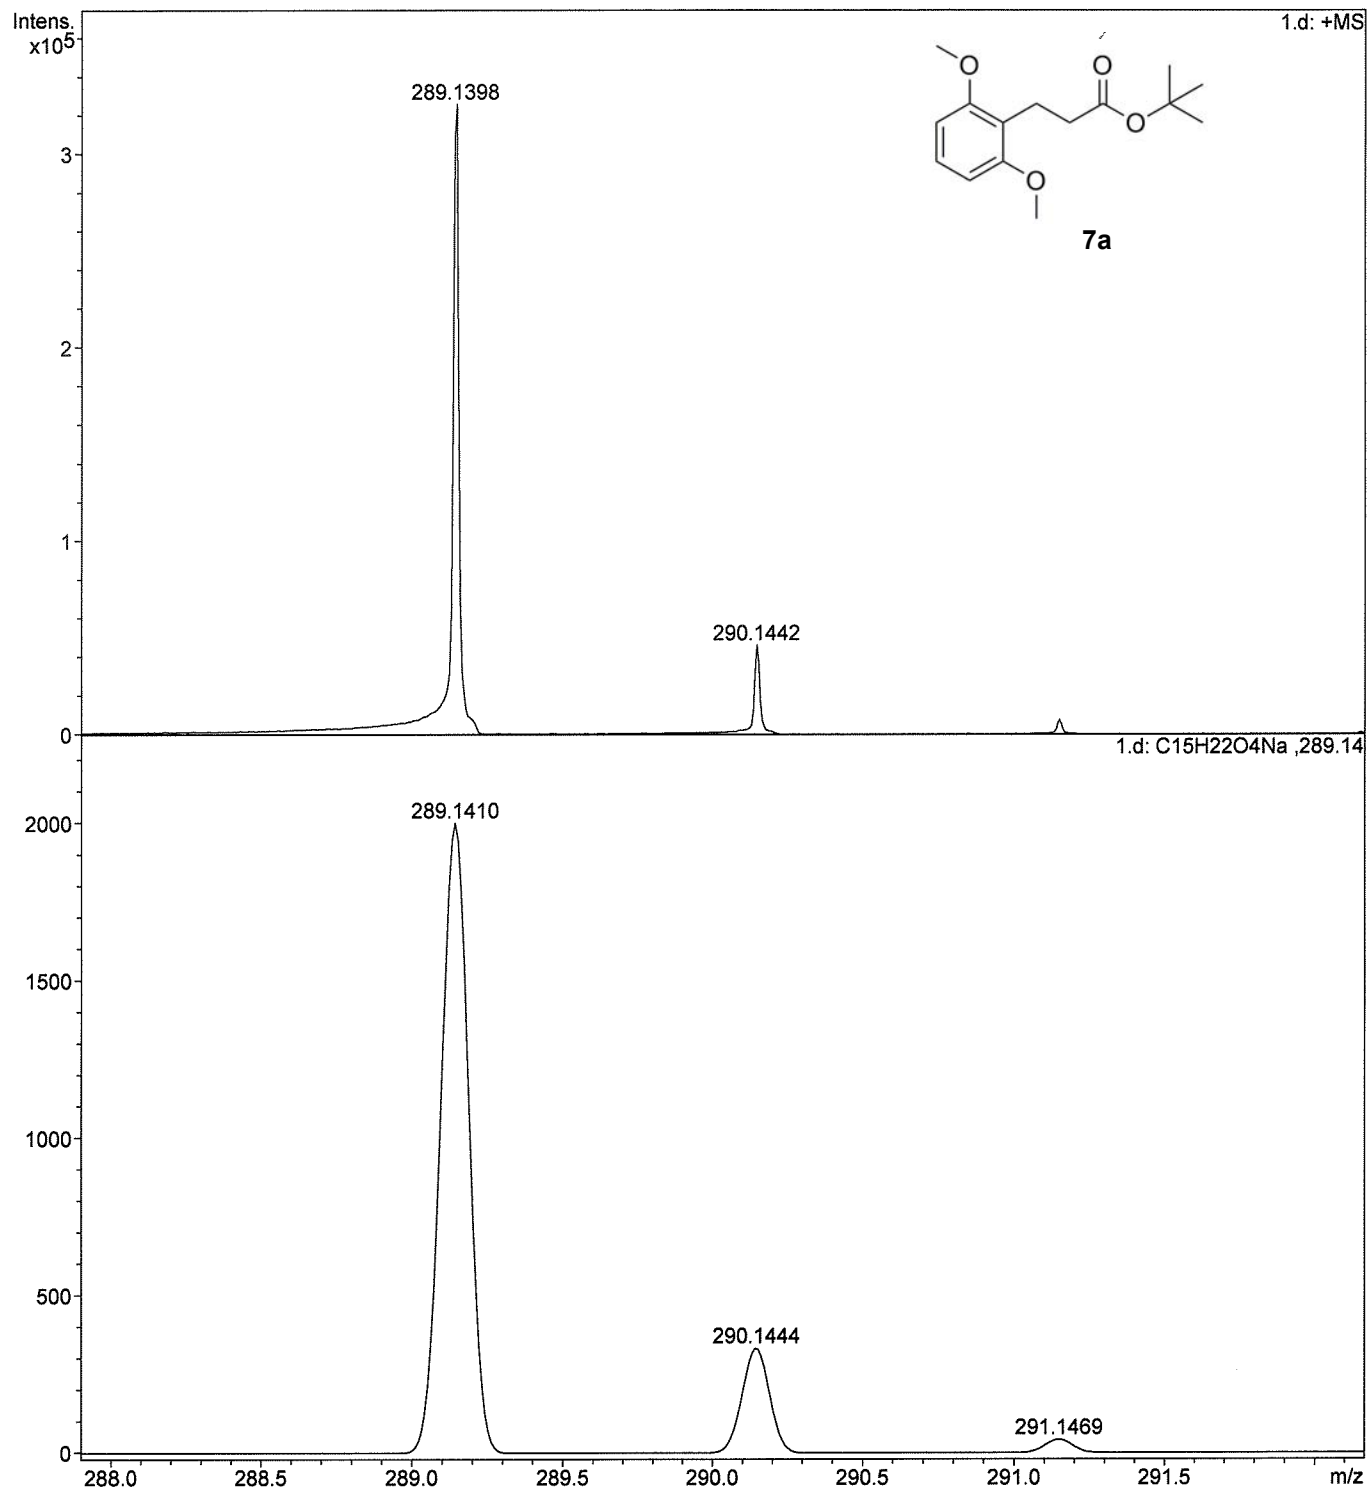

# Generic Display Report

## Analysis Info

Analysis Name D:\Bruker\data\zhosun\I-201b\1.d  
Method user-1pass\_pos\_mid.tofpar  
Sample Name I-201b  
Comment Free format commentsFree format commentsFree format comments

Acquisition Date 12/9/2009 2:00:50 PM

Operator operator name  
Instrument BioTOF II

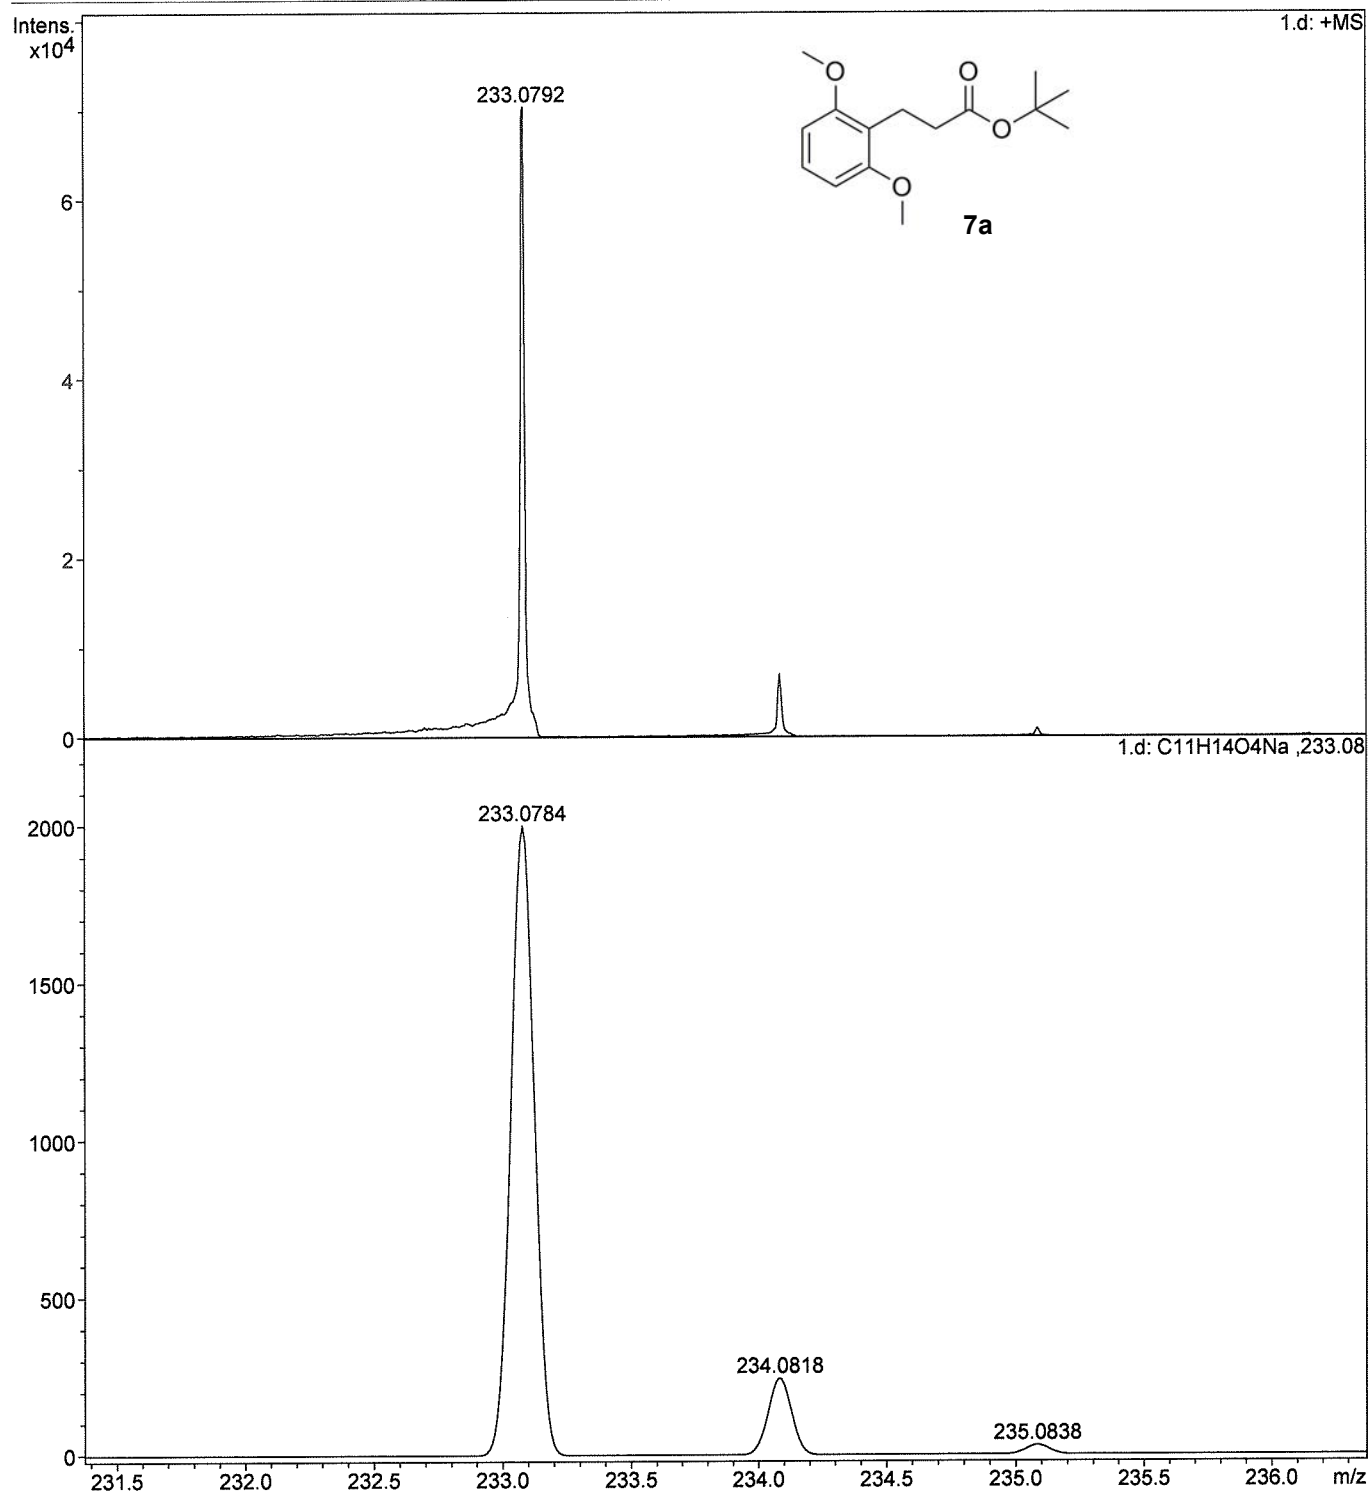

zsun-II-56-H1

Pulse Sequence: s2pu1

Solvent: cdcl3  
Temp. 25.0 C / 298.1 K  
File: zsun-II-56-H1  
INOVA-400 "vnmr400"

Relax. delay 0.300 sec  
Pulse 45.0 degrees  
Acq. time 3.334 sec  
Width 4662.0 Hz  
60 repetitions  
OBSERVE H1, 399.9356399 MHz  
DATA PROCESSING  
FT size 262144  
Total time 3 min, 38 sec

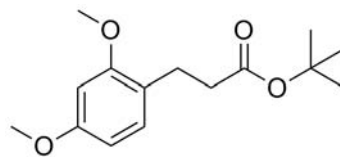

8a

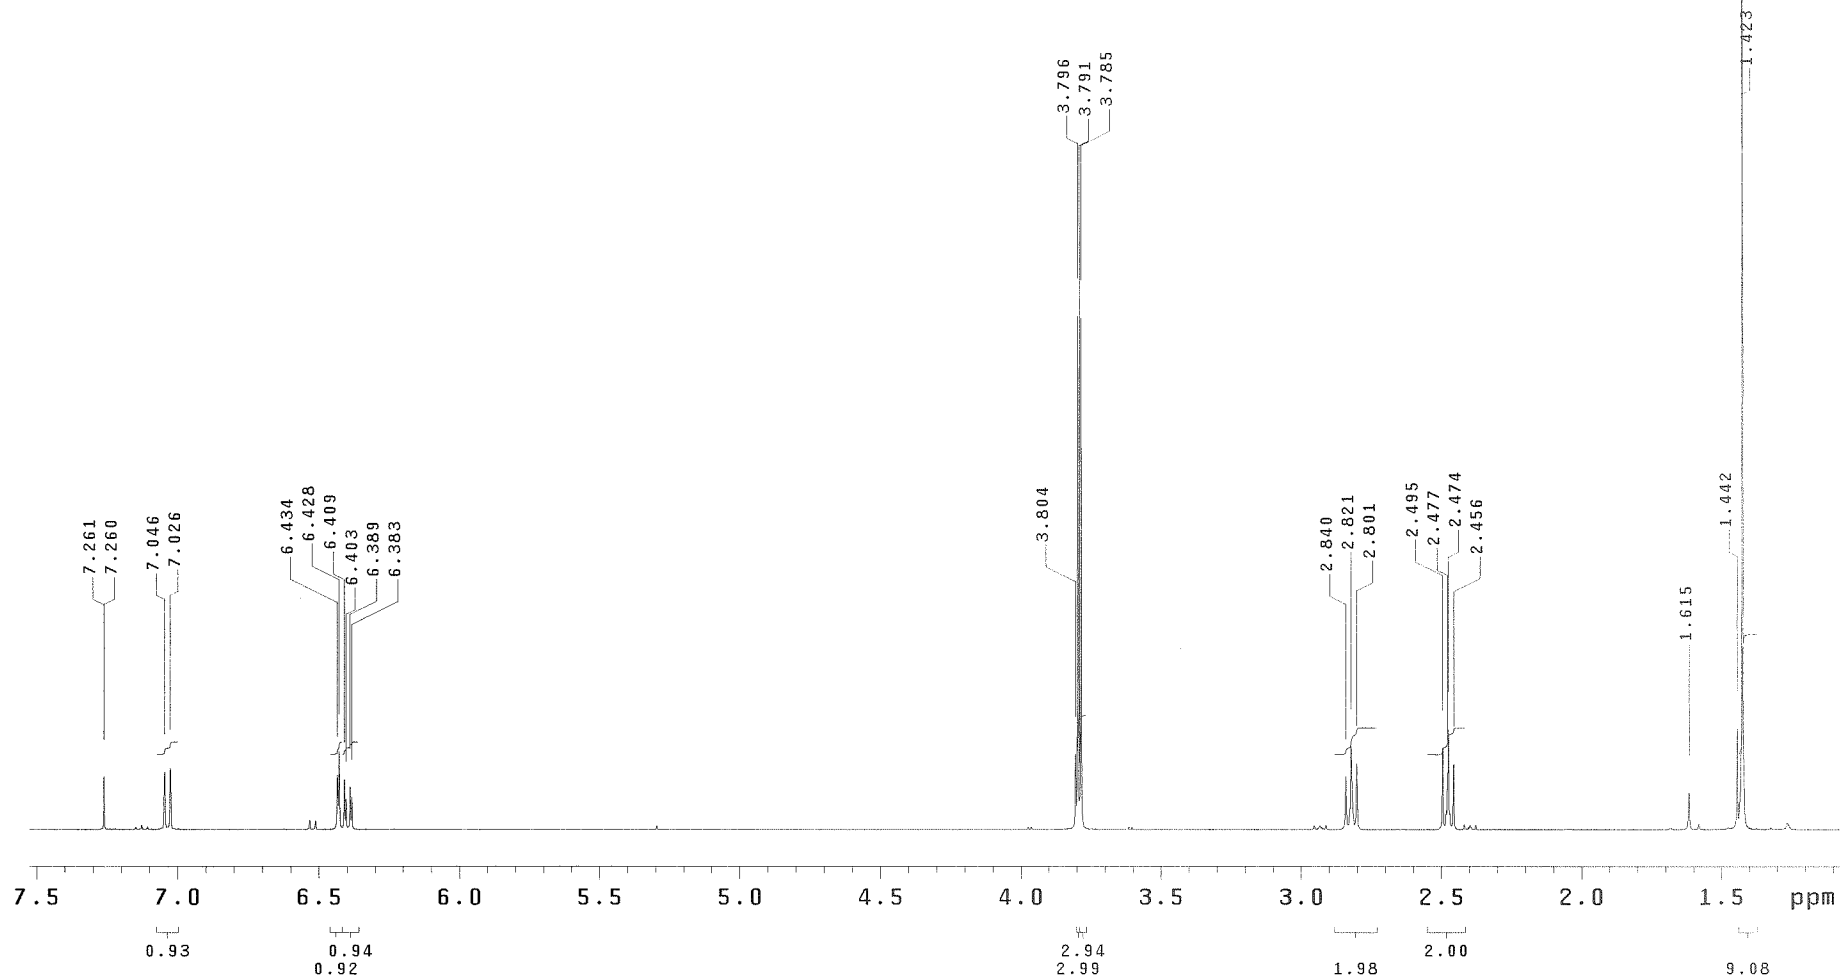

zsun-II-56-H1

Pulse Sequence: s2pu1

Solvent: cdcl3

Temp. 25.0 C / 298.1 K

File: zsun-II-56-H1

INOVA-400 "vnmr400"

Relax. delay 0.300 sec

Pulse 45.0 degrees

Acq. time 3.334 sec

Width 4662.0 Hz

60 repetitions

OBSERVE H1, 399.9356399 MHz

DATA PROCESSING

FT size 262144

Total time 3 min, 38 sec

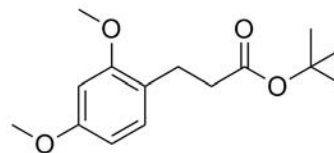

8a

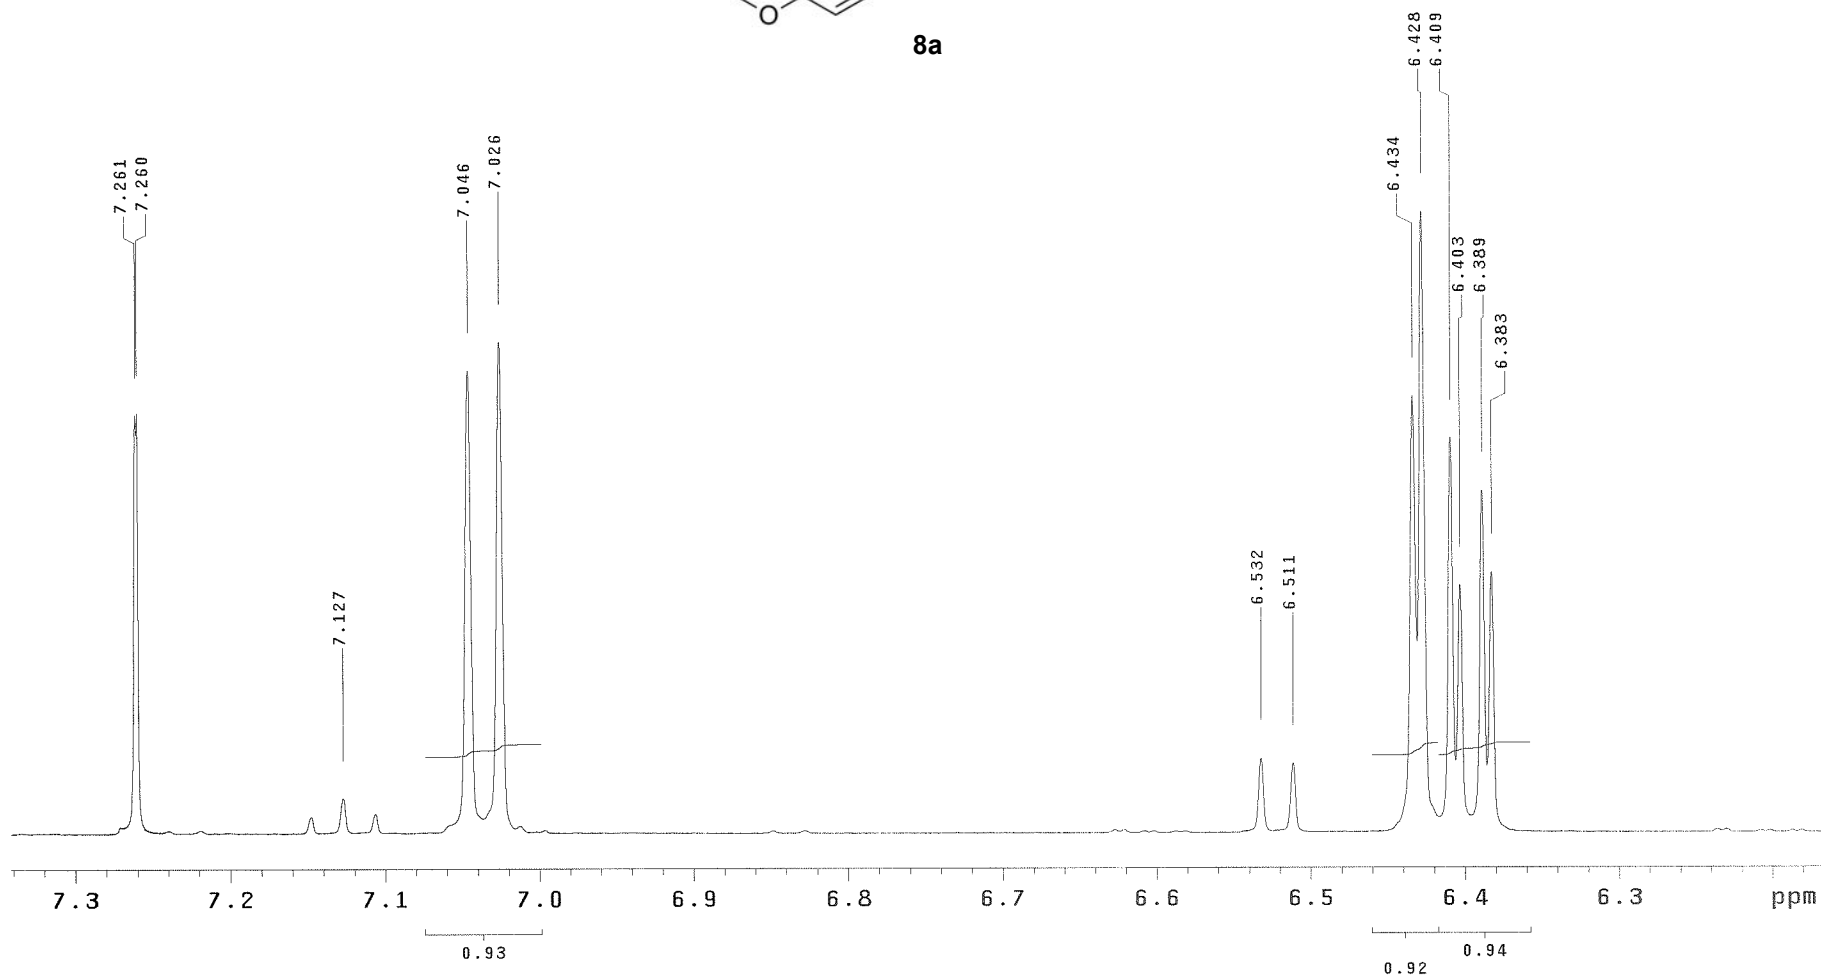

zsun-II-56-H1

Pulse Sequence: s2pu1

Solvent: cdcl3  
Temp. 25.0 C / 298.1 K  
File: zsun-II-56-H1  
INOVA-400 "vnmr400"

Relax. delay 0.300 sec  
Pulse 45.0 degrees  
Acq. time 3.334 sec  
Width 4662.0 Hz  
60 repetitions  
OBSERVE H1, 399.9356399 MHz  
DATA PROCESSING  
FT size 262144  
Total time 3 min, 38 sec

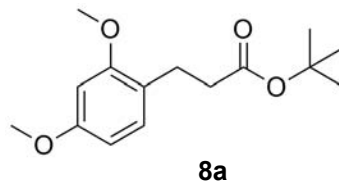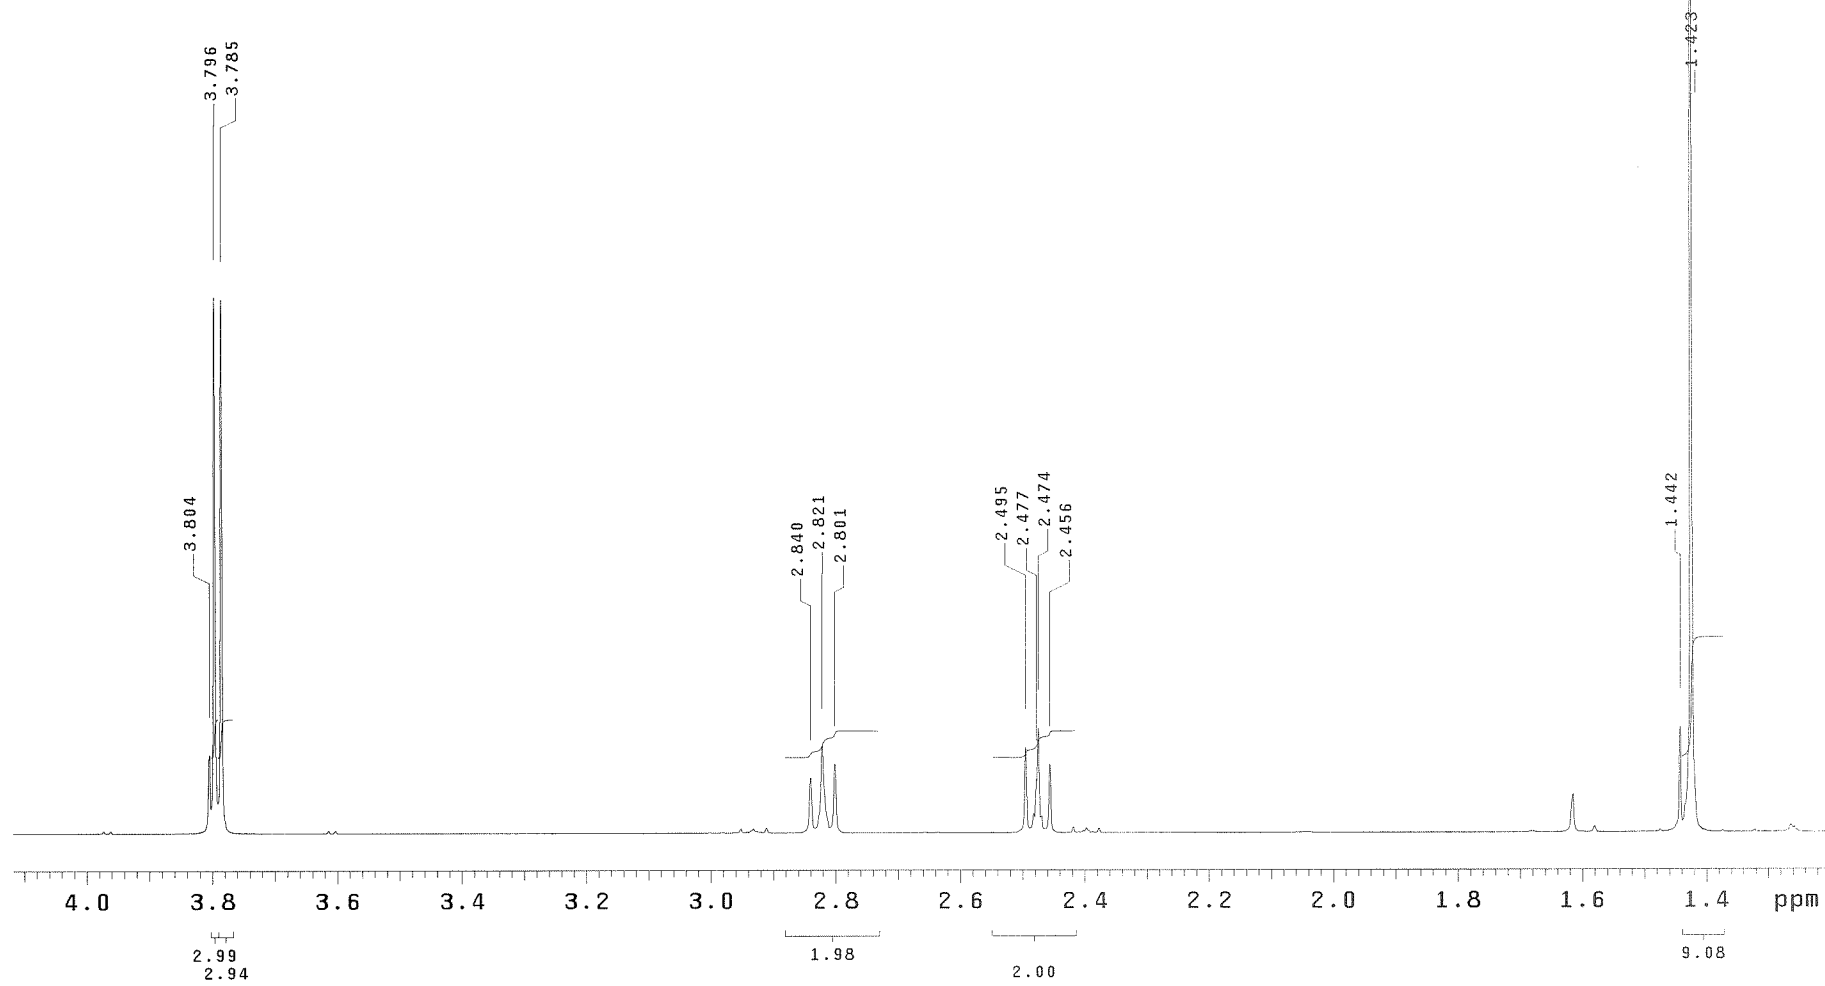



zsun-II-56-C13

Pulse Sequence: s2pu1

Solvent: cdcl3  
Temp. 25.0 C / 298.1 K  
INOVA-400 "vnmr400"

Relax. delay 0.300 sec  
Pulse 45.0 degrees  
Acq. time 0.720 sec  
Width 22222.2 Hz  
568 repetitions  
OBSERVE C13, 100.5638752 MHz  
DECOUPLE H1, 399.9376499 MHz  
Power 35 dB  
on during acquisition  
off during delay  
WALTZ-16 modulated  
DATA PROCESSING  
Line broadening 1.0 Hz  
FT size 32768  
Total time 51 min, 28 sec

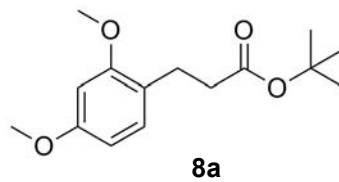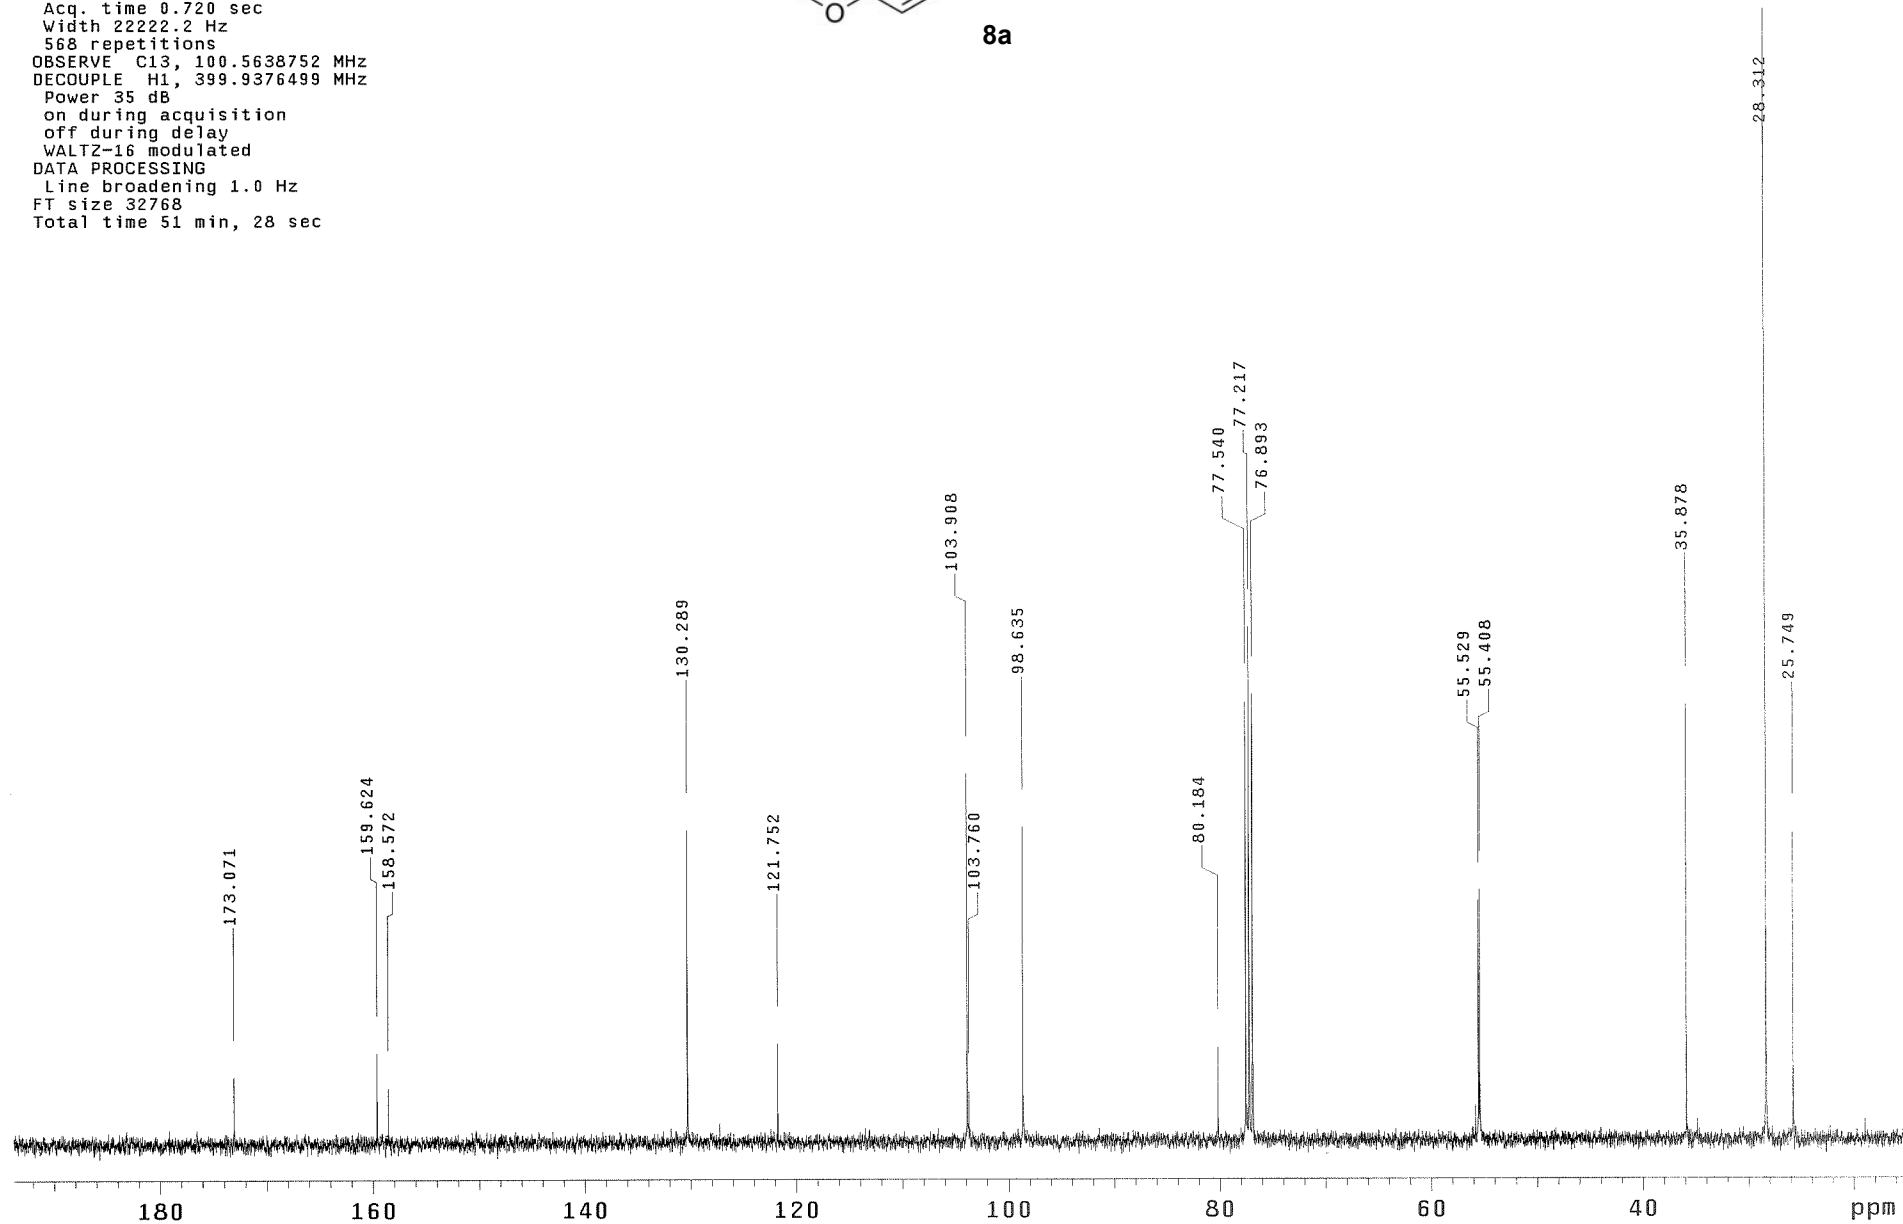

# Generic Display Report

## Analysis Info

Analysis Name D:\Bruker\data\zhosun\II-56-standard\2.d  
Method user-1pass\_pos\_mid.tofpar  
Sample Name II-56-standard  
Comment Free format commentsFree format commentsFree format comments

Acquisition Date 8/27/2009 5:02:58 PM

Operator operator name  
Instrument BioTOF II

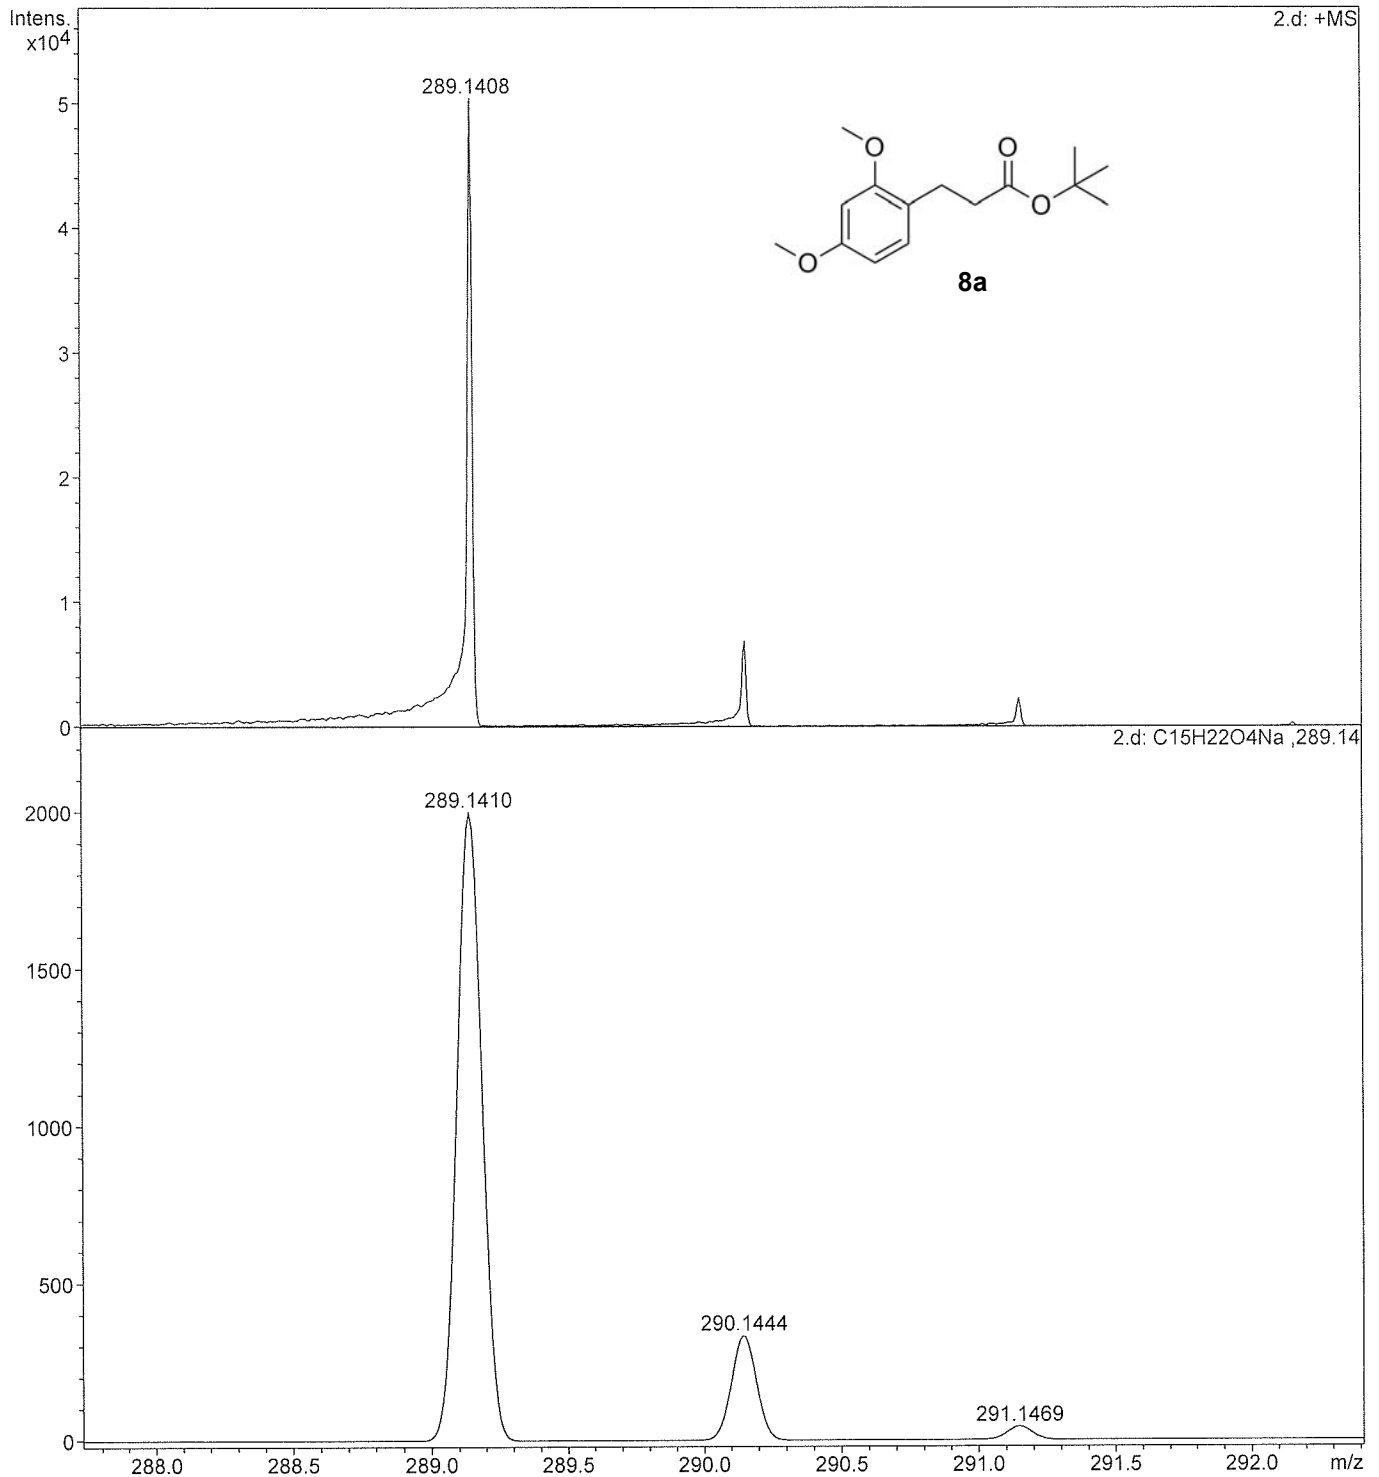

# Generic Display Report

## Analysis Info

Analysis Name D:\Bruker\data\zhosun\II-56-standard\2.d  
Method user-1pass\_pos\_mid.tofpar  
Sample Name II-56-standard  
Comment Free format commentsFree format commentsFree format comments

Acquisition Date 8/27/2009 5:02:58 PM

Operator operator name  
Instrument BioTOF II

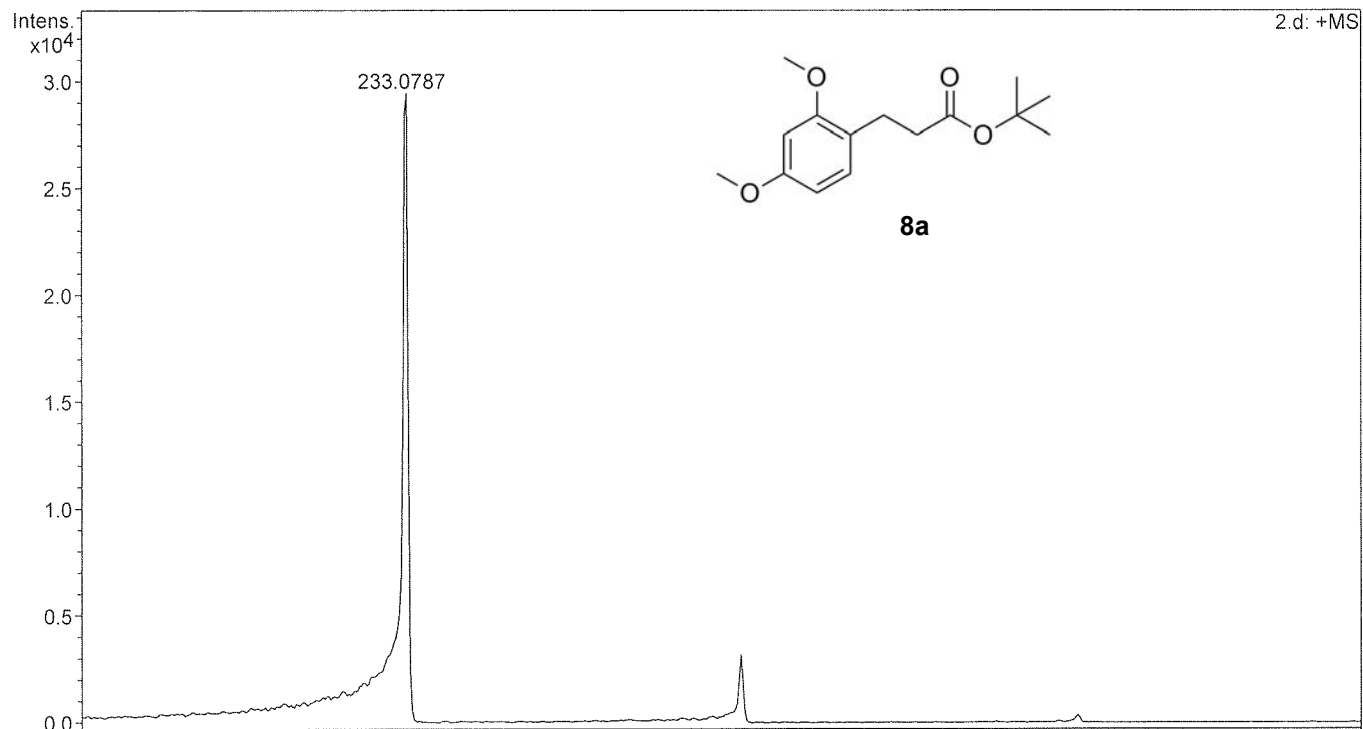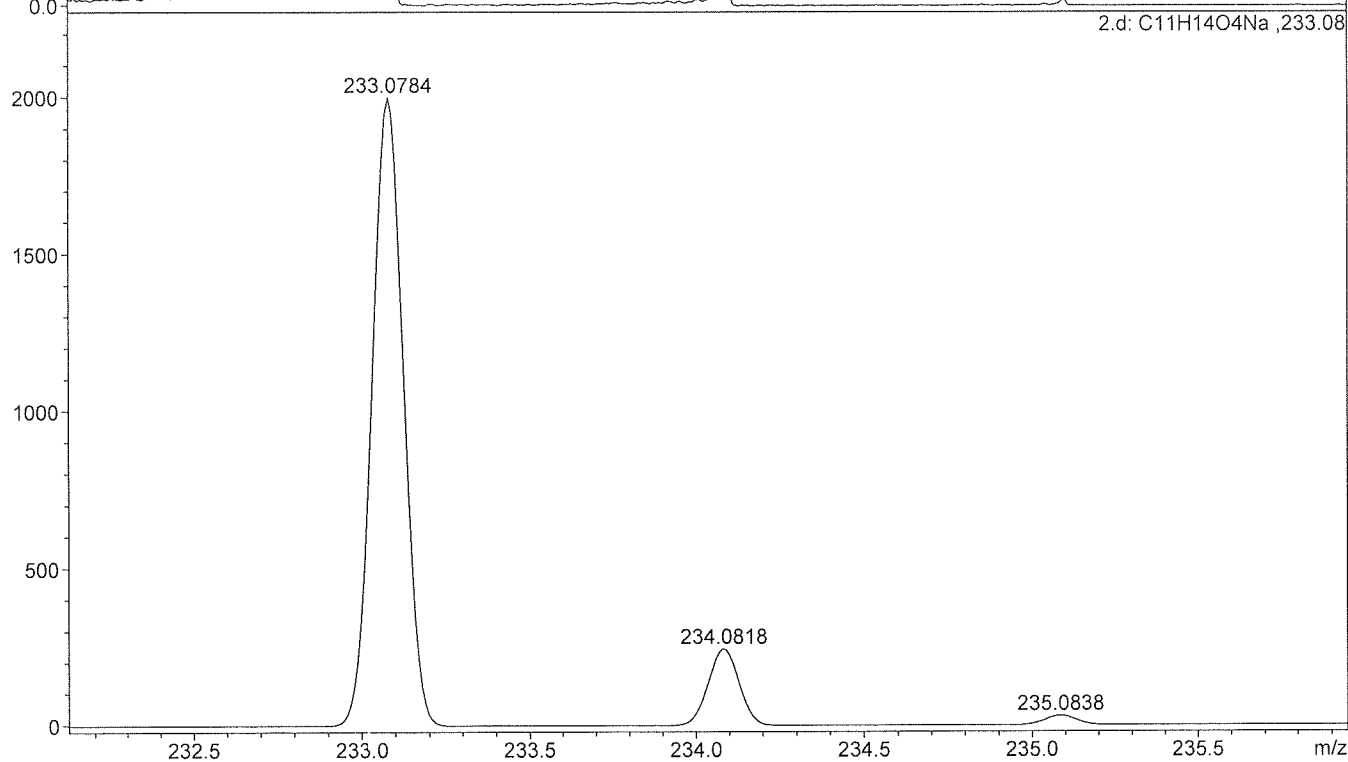

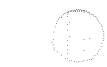

zsun-II-155a-31P

Sample directory: P-31-1903\_13Mar2003

Pulse Sequence: s2pul

Solvent: CDCl3

Ambient temperature

Operator: zsun

File: zsun-II-155a-31P

Mercury-300BB "vnmr300"

Relax. delay 1.000 sec  
Pulse 35.0 degrees  
Acq. time 1.600 sec  
Width 18214.9 Hz  
120 repetitions  
OBSERVE P31, 121.4927885 MHz  
DECOUPLE H1, 300.1391844 MHz  
Power 43 dB  
continuously on  
WALTZ-16 modulated  
DATA PROCESSING  
Line broadening 1.0 Hz  
FT size 65536  
Total time 23 min, 38 sec

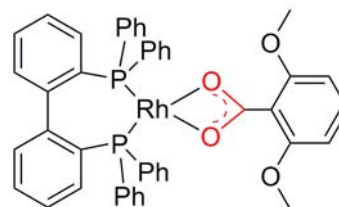

**2b**

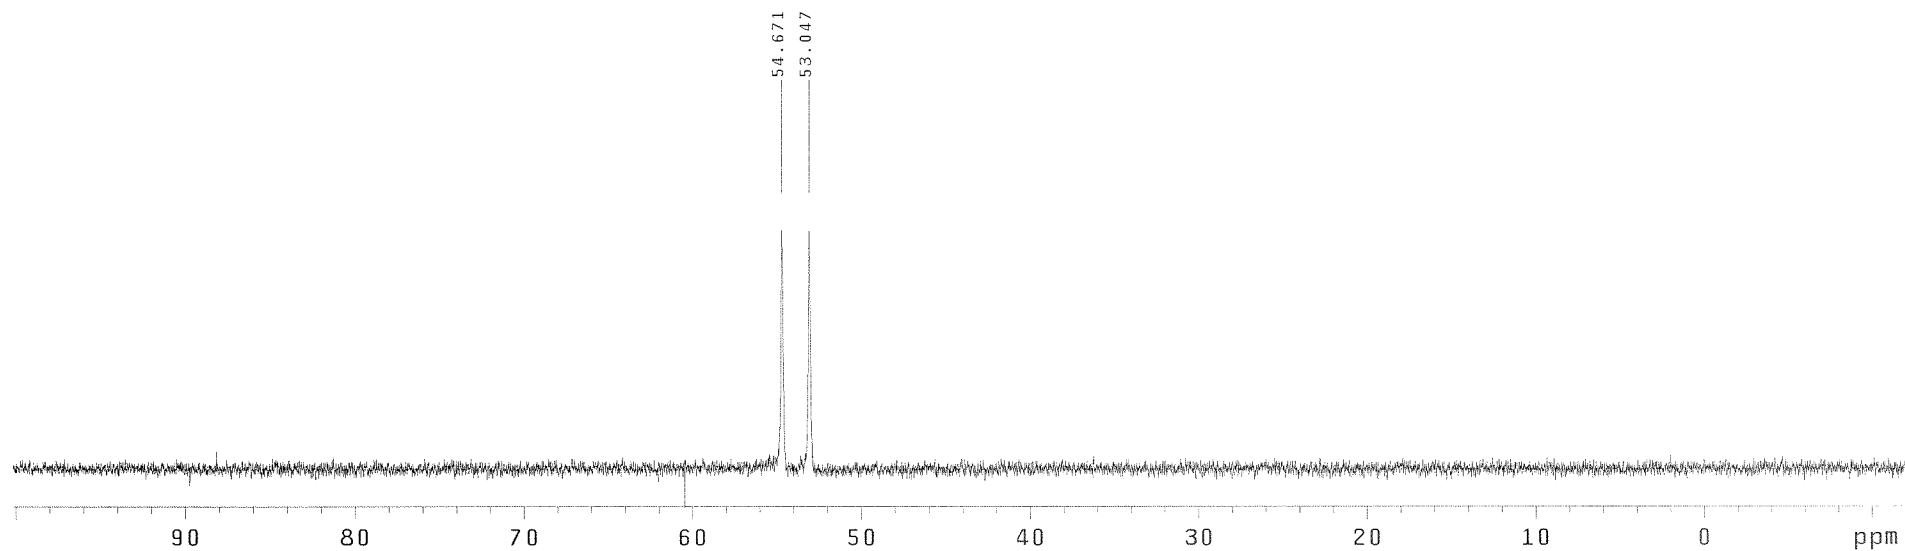

S52

zsun-IV-95-1-P31-10Cbelow

Pulse Sequence: s2pu1

Solvent: toluene

Temp. -10.0 C / 263.1 K

Operator: zsun

INOVA-500 "vnmr500"

Pulse 128.6 degrees

Acq. time 1.600 sec

Width 40000.0 Hz

340 repetitions

OBSERVE P31, 202.2639508 MHz

DECOUPLE H1, 499.6592816 MHz

Power 40 dB

continuously on

WALTZ-16 modulated

DATA PROCESSING

Line broadening 1.0 Hz

FT size 131072

Total time 16 min, 5 sec

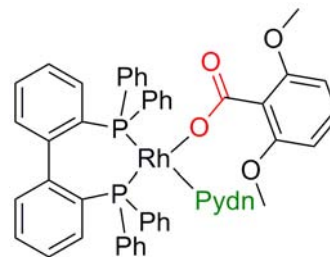

Pydn = Pyridine

**3b**

**-10°C**

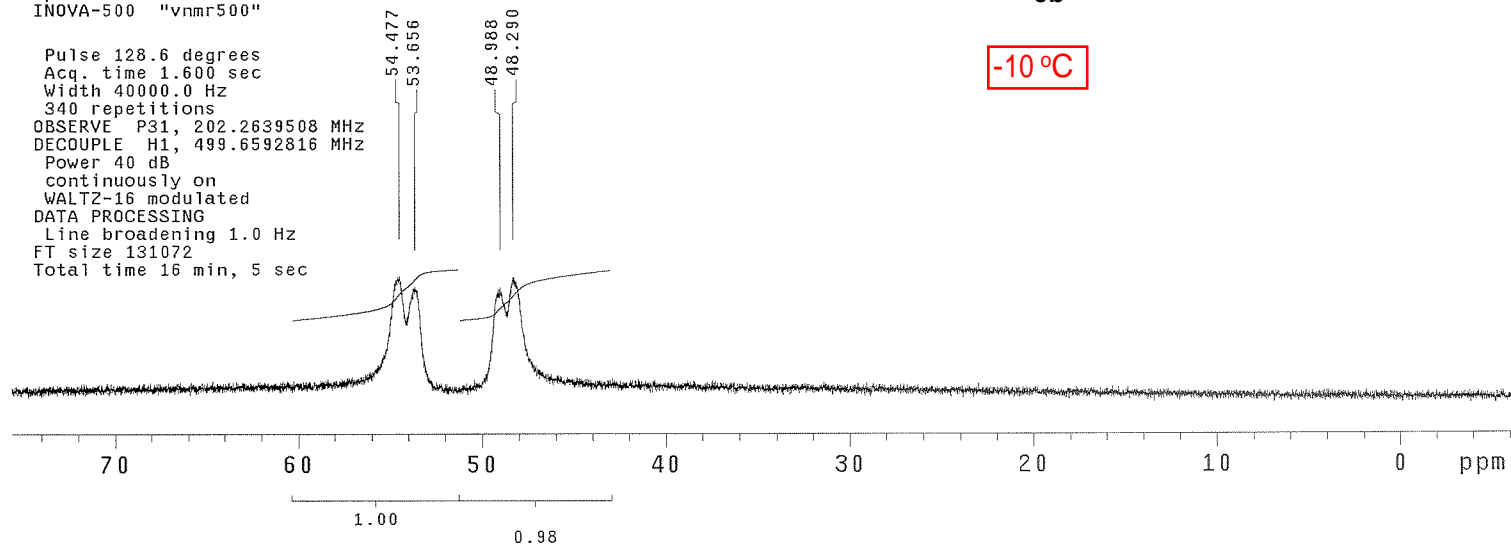

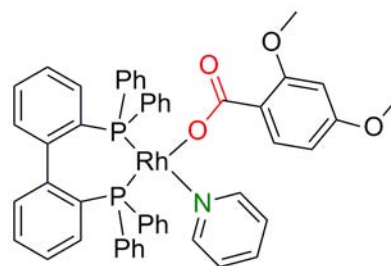

**4b**

-10 °C

zsun-IV-95-2-P31-below10C

Pulse Sequence: s2pu1

Solvent: toluene  
 Temp. -10.0 C / 263.1 K  
 Operator: zsun  
 INOVA-500 "vnmr500"

Pulse 128.6 degrees  
 Acq. time 1.600 sec  
 Width 40000.0 Hz  
 520 repetitions  
 OBSERVE P31, 202.2637320 MHz  
 DECOUPLE H1, 499.6592816 MHz  
 Power 40 dB  
 continuously on  
 WALTZ-16 modulated  
 DATA PROCESSING  
 Line broadening 1.0 Hz  
 FT size 131072  
 Total time 2 hr, 40 min, 53 sec

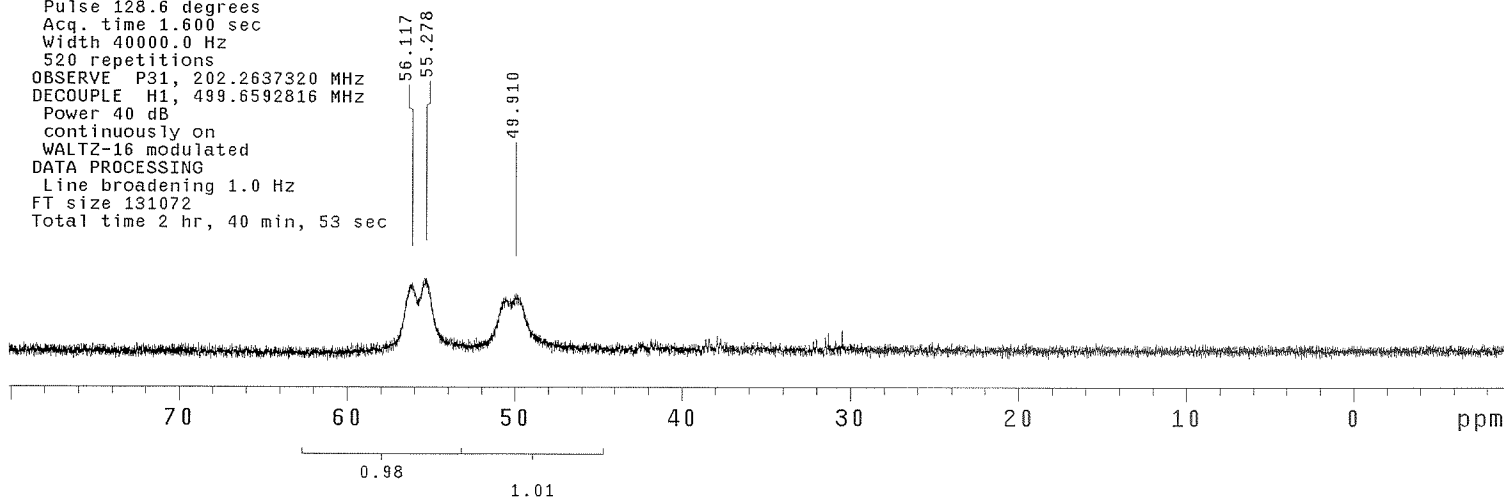

Supplement: NIHMS539058-supplement-2_si_001.pdf [file NIHMS539058-supplement-2_si_001.pdf]
